# Supplementary material for: A justice-based framework to determine countries’ fair warming contributions to Paris Agreement
Source: Research Square preprint supplement (doi:10.21203/rs.3.rs-4129114/v1), 2024-03-29
Supplement: Supplementary file 1 [file a5707df0af194407f65ebcb1.xlsx]

## Sheet: Sheet1
	ISO3	Country	Country group	Warming target (℃)	Adjustment extent	Start year of historical contributions	Aerosol masking effect percentile	Indicator of equity interpretation	Total CO2-we budgets per capita (1850-2050)(tCO2-we)	Remaining CO2-we budgets per capita (2021-2050)(tCO2-we)	Historical CO2-we per capita emissions until 2021(tCO2-we)
0	ABW	Aruba	developing	1.5	0%	1850	0.5	Equal per capita	409.013	-3865.59	4274.6
1	AFG	Afghanistan	ldc	1.5	0%	1850	0.5	Equal per capita	409.013	370.457	38.5556
2	AGO	Angola	ldc	1.5	0%	1850	0.5	Equal per capita	409.013	286.224	122.789
3	AIA	Anguilla	developing	1.5	0%	1850	0.5	Equal per capita	409.013	-70.3078	479.32
4	ALB	Albania	developed	1.5	0%	1850	0.5	Equal per capita	409.013	104.54	304.473
5	AND	Andorra	developed	1.5	0%	1850	0.5	Equal per capita	409.013	-98.4973	507.51
6	ARE	United Arab Emirates	developing	1.5	0%	1850	0.5	Equal per capita	409.013	-522.765	931.777
7	ARG	Argentina	developing	1.5	0%	1850	0.5	Equal per capita	409.013	-137.933	546.946
8	ARM	Armenia	developing	1.5	0%	1850	0.5	Equal per capita	409.013	-164.122	573.135
9	ATG	Antigua and Barbuda	developing	1.5	0%	1850	0.5	Equal per capita	409.013	-92.0565	501.069
10	AUS	Australia	developed	1.5	0%	1850	0.5	Equal per capita	409.013	-912.557	1321.57
11	AUT	Austria	developed	1.5	0%	1850	0.5	Equal per capita	409.013	-652.655	1061.67
12	AZE	Azerbaijan	developing	1.5	0%	1850	0.5	Equal per capita	409.013	-269.986	678.999
13	BDI	Burundi	ldc	1.5	0%	1850	0.5	Equal per capita	409.013	388.875	20.1378
14	BEL	Belgium	developed	1.5	0%	1850	0.5	Equal per capita	409.013	-1205.38	1614.39
15	BEN	Benin	ldc	1.5	0%	1850	0.5	Equal per capita	409.013	364.292	44.7201
16	BFA	Burkina Faso	ldc	1.5	0%	1850	0.5	Equal per capita	409.013	361.164	47.849
17	BGD	Bangladesh	ldc	1.5	0%	1850	0.5	Equal per capita	409.013	363.844	45.1684
18	BGR	Bulgaria	developed	1.5	0%	1850	0.5	Equal per capita	409.013	-1033.09	1442.1
19	BHR	Bahrain	developing	1.5	0%	1850	0.5	Equal per capita	409.013	-1756.09	2165.1
20	BHS	Bahamas	developing	1.5	0%	1850	0.5	Equal per capita	409.013	-278.072	687.084
21	BIH	Bosnia and Herzegovina	developed	1.5	0%	1850	0.5	Equal per capita	409.013	-593.821	1002.83
22	BLR	Belarus	developed	1.5	0%	1850	0.5	Equal per capita	409.013	-841.196	1250.21
23	BLZ	Belize	developing	1.5	0%	1850	0.5	Equal per capita	409.013	134.681	274.331
24	BOL	Bolivia	developing	1.5	0%	1850	0.5	Equal per capita	409.013	228.042	180.97
25	BRA	Brazil	developing	1.5	0%	1850	0.5	Equal per capita	409.013	34.4622	374.55
26	BRB	Barbados	developing	1.5	0%	1850	0.5	Equal per capita	409.013	-1372.32	1781.33
27	BRN	Brunei Darussalam	developing	1.5	0%	1850	0.5	Equal per capita	409.013	-1863.41	2272.43
28	BTN	Bhutan	ldc	1.5	0%	1850	0.5	Equal per capita	409.013	77.0142	331.998
29	BWA	Botswana	developing	1.5	0%	1850	0.5	Equal per capita	409.013	-40.1103	449.123
30	CAF	Central African Republic	ldc	1.5	0%	1850	0.5	Equal per capita	409.013	159.329	249.683
31	CAN	Canada	developed	1.5	0%	1850	0.5	Equal per capita	409.013	-981.58	1390.59
32	CHE	Switzerland	developed	1.5	0%	1850	0.5	Equal per capita	409.013	-199.129	608.142
33	CHL	Chile	developing	1.5	0%	1850	0.5	Equal per capita	409.013	92.6856	316.327
34	CHN	China	developing	1.5	0%	1850	0.5	Equal per capita	409.013	-7.80622	416.819
35	CIV	Cote d'Ivoire	developing	1.5	0%	1850	0.5	Equal per capita	409.013	361.947	47.0658
36	CMR	Cameroon	developing	1.5	0%	1850	0.5	Equal per capita	409.013	337.305	71.7074
37	COD	DR Congo	ldc	1.5	0%	1850	0.5	Equal per capita	409.013	374.854	34.1587
38	COG	Congo Republic	developing	1.5	0%	1850	0.5	Equal per capita	409.013	197.876	211.136
39	COK	Cook Islands	developing	1.5	0%	1850	0.5	Equal per capita	409.013	40.3241	368.688
40	COL	Colombia	developing	1.5	0%	1850	0.5	Equal per capita	409.013	199.989	209.023
41	COM	Comoros	ldc	1.5	0%	1850	0.5	Equal per capita	409.013	337.195	71.8179
42	CPV	Cabo Verde	developing	1.5	0%	1850	0.5	Equal per capita	409.013	334.307	74.7056
43	CRI	Costa Rica	developing	1.5	0%	1850	0.5	Equal per capita	409.013	198.404	210.609
44	CUB	Cuba	developing	1.5	0%	1850	0.5	Equal per capita	409.013	-57.2447	466.257
45	CYP	Cyprus	developed	1.5	0%	1850	0.5	Equal per capita	409.013	-49.0647	458.077
46	CZE	Czech Republic	developed	1.5	0%	1850	0.5	Equal per capita	409.013	-1276.47	1685.48
47	DEU	Germany	developed	1.5	0%	1850	0.5	Equal per capita	409.013	-1480.16	1889.17
48	DJI	Djibouti	ldc	1.5	0%	1850	0.5	Equal per capita	409.013	279.367	129.645
49	DMA	Dominica	developing	1.5	0%	1850	0.5	Equal per capita	409.013	146.755	262.258
50	DNK	Denmark	developed	1.5	0%	1850	0.5	Equal per capita	409.013	-816.418	1225.43
51	DOM	Dominican Republic	developing	1.5	0%	1850	0.5	Equal per capita	409.013	223.692	185.321
52	DZA	Algeria	developing	1.5	0%	1850	0.5	Equal per capita	409.013	158.017	250.995
53	ECU	Ecuador	developing	1.5	0%	1850	0.5	Equal per capita	409.013	181.654	227.358
54	EGY	Egypt	developing	1.5	0%	1850	0.5	Equal per capita	409.013	306.461	102.552
55	ERI	Eritrea	ldc	1.5	0%	1850	0.5	Equal per capita	409.013	285.07	123.943
56	ESP	Spain	developed	1.5	0%	1850	0.5	Equal per capita	409.013	-239.793	648.806
57	EST	Estonia	developed	1.5	0%	1850	0.5	Equal per capita	409.013	-2347.19	2756.2
58	ETH	Ethiopia	ldc	1.5	0%	1850	0.5	Equal per capita	409.013	361.643	47.3696
59	FIN	Finland	developed	1.5	0%	1850	0.5	Equal per capita	409.013	-789.63	1198.64
60	FJI	Fiji	developing	1.5	0%	1850	0.5	Equal per capita	409.013	158.262	250.75
61	FRA	France	developed	1.5	0%	1850	0.5	Equal per capita	409.013	-635.88	1044.89
62	FSM	Micronesia, Fed. Sts.	developing	1.5	0%	1850	0.5	Equal per capita	409.013	299.092	109.921
63	GAB	Gabon	developing	1.5	0%	1850	0.5	Equal per capita	409.013	-145.464	554.476
64	GBR	United Kingdom	developed	1.5	0%	1850	0.5	Equal per capita	409.013	-1324.57	1733.58
65	GEO	Georgia	developing	1.5	0%	1850	0.5	Equal per capita	409.013	-639.864	1048.88
66	GHA	Ghana	developing	1.5	0%	1850	0.5	Equal per capita	409.013	360.033	48.9796
67	GIN	Guinea	ldc	1.5	0%	1850	0.5	Equal per capita	409.013	309.29	99.7229
68	GMB	Gambia	ldc	1.5	0%	1850	0.5	Equal per capita	409.013	357.162	51.8508
69	GNB	Guinea-Bissau	ldc	1.5	0%	1850	0.5	Equal per capita	409.013	309.661	99.3519
70	GNQ	Equatorial Guinea	developing	1.5	0%	1850	0.5	Equal per capita	409.013	-37.4254	446.438
71	GRC	Greece	developed	1.5	0%	1850	0.5	Equal per capita	409.013	-497.596	906.608
72	GRD	Grenada	developing	1.5	0%	1850	0.5	Equal per capita	409.013	233.019	175.993
73	GTM	Guatemala	developing	1.5	0%	1850	0.5	Equal per capita	409.013	308.808	100.205
74	GUY	Guyana	developing	1.5	0%	1850	0.5	Equal per capita	409.013	-132.381	541.394
75	HND	Honduras	developing	1.5	0%	1850	0.5	Equal per capita	409.013	321.935	87.0776
76	HRV	Croatia	developed	1.5	0%	1850	0.5	Equal per capita	409.013	-388.285	797.297
77	HTI	Haiti	ldc	1.5	0%	1850	0.5	Equal per capita	409.013	325.618	83.3943
78	HUN	Hungary	developed	1.5	0%	1850	0.5	Equal per capita	409.013	-595.625	1004.64
79	IDN	Indonesia	developing	1.5	0%	1850	0.5	Equal per capita	409.013	252.339	156.673
80	IND	India	developing	1.5	0%	1850	0.5	Equal per capita	409.013	314.287	94.7255
81	IRL	Ireland	developed	1.5	0%	1850	0.5	Equal per capita	409.013	-715.962	1124.97
82	IRN	Iran	developing	1.5	0%	1850	0.5	Equal per capita	409.013	-69.5188	478.531
83	IRQ	Iraq	developing	1.5	0%	1850	0.5	Equal per capita	409.013	182.843	226.17
84	ISL	Iceland	developed	1.5	0%	1850	0.5	Equal per capita	409.013	-743.246	1152.26
85	ISR	Israel	developed	1.5	0%	1850	0.5	Equal per capita	409.013	2.21992	406.793
86	ITA	Italy	developed	1.5	0%	1850	0.5	Equal per capita	409.013	-457.783	866.796
87	JAM	Jamaica	developing	1.5	0%	1850	0.5	Equal per capita	409.013	-207.34	616.352
88	JOR	Jordan	developing	1.5	0%	1850	0.5	Equal per capita	409.013	284.522	124.49
89	JPN	Japan	developed	1.5	0%	1850	0.5	Equal per capita	409.013	-577.069	986.081
90	KAZ	Kazakhstan	developing	1.5	0%	1850	0.5	Equal per capita	409.013	-827.793	1236.81
91	KEN	Kenya	developing	1.5	0%	1850	0.5	Equal per capita	409.013	336.062	72.9507
92	KGZ	Kyrgyz Republic	developing	1.5	0%	1850	0.5	Equal per capita	409.013	139.26	269.752
93	KHM	Cambodia	ldc	1.5	0%	1850	0.5	Equal per capita	409.013	248.112	160.901
94	KIR	Kiribati	ldc	1.5	0%	1850	0.5	Equal per capita	409.013	376.012	33.0009
95	KNA	St. Kitts and Nevis	developing	1.5	0%	1850	0.5	Equal per capita	409.013	-182.396	591.409
96	KOR	South Korea	developed	1.5	0%	1850	0.5	Equal per capita	409.013	-283.032	692.044
97	KWT	Kuwait	developing	1.5	0%	1850	0.5	Equal per capita	409.013	-1267.67	1676.68
98	LAO	Laos	ldc	1.5	0%	1850	0.5	Equal per capita	409.013	261.255	147.758
99	LBN	Lebanon	developing	1.5	0%	1850	0.5	Equal per capita	409.013	18.2249	390.788
100	LBR	Liberia	ldc	1.5	0%	1850	0.5	Equal per capita	409.013	366.708	42.3043
101	LBY	Libya	developing	1.5	0%	1850	0.5	Equal per capita	409.013	-395.428	804.44
102	LCA	St. Lucia	developing	1.5	0%	1850	0.5	Equal per capita	409.013	168.67	240.342
103	LIE	Liechtenstein	developed	1.5	0%	1850	0.5	Equal per capita	409.013	-272.856	681.869
104	LKA	Sri Lanka	developing	1.5	0%	1850	0.5	Equal per capita	409.013	287.201	121.811
105	LSO	Lesotho	ldc	1.5	0%	1850	0.5	Equal per capita	409.013	251.041	157.972
106	LTU	Lithuania	developed	1.5	0%	1850	0.5	Equal per capita	409.013	-1308.29	1717.3
107	LUX	Luxembourg	developed	1.5	0%	1850	0.5	Equal per capita	409.013	-1452.82	1861.83
108	LVA	Latvia	developed	1.5	0%	1850	0.5	Equal per capita	409.013	-1048.23	1457.24
109	MAR	Morocco	developing	1.5	0%	1850	0.5	Equal per capita	409.013	295.198	113.815
110	MCO	Monaco	developed	1.5	0%	1850	0.5	Equal per capita	409.013	-13.1287	422.141
111	MDA	Moldova	developed	1.5	0%	1850	0.5	Equal per capita	409.013	-611.145	1020.16
112	MDG	Madagascar	ldc	1.5	0%	1850	0.5	Equal per capita	409.013	333.808	75.2042
113	MDV	Maldives	developing	1.5	0%	1850	0.5	Equal per capita	409.013	327.09	81.9229
114	MEX	Mexico	developing	1.5	0%	1850	0.5	Equal per capita	409.013	74.2788	334.734
115	MHL	Marshall Islands	developing	1.5	0%	1850	0.5	Equal per capita	409.013	147.53	261.483
116	MKD	North Macedonia	developed	1.5	0%	1850	0.5	Equal per capita	409.013	-344.495	753.508
117	MLI	Mali	ldc	1.5	0%	1850	0.5	Equal per capita	409.013	332.355	76.6577
118	MLT	Malta	developed	1.5	0%	1850	0.5	Equal per capita	409.013	18.3424	390.67
119	MMR	Myanmar	ldc	1.5	0%	1850	0.5	Equal per capita	409.013	316.024	92.9881
120	MNE	Montenegro	developed	1.5	0%	1850	0.5	Equal per capita	409.013	-226.9	635.912
121	MNG	Mongolia	developing	1.5	0%	1850	0.5	Equal per capita	409.013	-322.45	731.463
122	MOZ	Mozambique	ldc	1.5	0%	1850	0.5	Equal per capita	409.013	345.775	63.2375
123	MRT	Mauritania	ldc	1.5	0%	1850	0.5	Equal per capita	409.013	300.338	108.674
124	MUS	Mauritius	developing	1.5	0%	1850	0.5	Equal per capita	409.013	37.0333	371.979
125	MWI	Malawi	ldc	1.5	0%	1850	0.5	Equal per capita	409.013	381.445	27.5672
126	MYS	Malaysia	developing	1.5	0%	1850	0.5	Equal per capita	409.013	51.8187	357.194
127	NAM	Namibia	developing	1.5	0%	1850	0.5	Equal per capita	409.013	-5.83535	414.848
128	NER	Niger	ldc	1.5	0%	1850	0.5	Equal per capita	409.013	376.433	32.5799
129	NGA	Nigeria	developing	1.5	0%	1850	0.5	Equal per capita	409.013	313.309	95.7035
130	NIC	Nicaragua	developing	1.5	0%	1850	0.5	Equal per capita	409.013	228.167	180.845
131	NIU	Niue	developing	1.5	0%	1850	0.5	Equal per capita	409.013	35.9476	373.065
132	NLD	Netherlands	developed	1.5	0%	1850	0.5	Equal per capita	409.013	-1000.66	1409.67
133	NOR	Norway	developed	1.5	0%	1850	0.5	Equal per capita	409.013	-648.106	1057.12
134	NPL	Nepal	ldc	1.5	0%	1850	0.5	Equal per capita	409.013	296.094	112.919
135	NRU	Nauru	developing	1.5	0%	1850	0.5	Equal per capita	409.013	162.909	246.104
136	NZL	New Zealand	developed	1.5	0%	1850	0.5	Equal per capita	409.013	-887.952	1296.96
137	OMN	Oman	developing	1.5	0%	1850	0.5	Equal per capita	409.013	-416.892	825.905
138	PAK	Pakistan	developing	1.5	0%	1850	0.5	Equal per capita	409.013	324.963	84.0497
139	PAN	Panama	developing	1.5	0%	1850	0.5	Equal per capita	409.013	203.693	205.32
140	PER	Peru	developing	1.5	0%	1850	0.5	Equal per capita	409.013	222.393	186.619
141	PHL	Philippines	developing	1.5	0%	1850	0.5	Equal per capita	409.013	321.536	87.4769
142	PLW	Palau	developing	1.5	0%	1850	0.5	Equal per capita	409.013	-2636.49	3045.5
143	PNG	Papua New Guinea	developing	1.5	0%	1850	0.5	Equal per capita	409.013	319.151	89.861
144	POL	Poland	developed	1.5	0%	1850	0.5	Equal per capita	409.013	-976.886	1385.9
145	PRK	North Korea	developing	1.5	0%	1850	0.5	Equal per capita	409.013	-54.9643	463.977
146	PRT	Portugal	developed	1.5	0%	1850	0.5	Equal per capita	409.013	-246.709	655.722
147	PRY	Paraguay	developing	1.5	0%	1850	0.5	Equal per capita	409.013	-69.8795	478.892
148	QAT	Qatar	developing	1.5	0%	1850	0.5	Equal per capita	409.013	-2283.06	2692.07
149	ROU	Romania	developed	1.5	0%	1850	0.5	Equal per capita	409.013	-563.133	972.146
150	RUS	Russia	developed	1.5	0%	1850	0.5	Equal per capita	409.013	-1353.88	1762.89
151	RWA	Rwanda	ldc	1.5	0%	1850	0.5	Equal per capita	409.013	379.591	29.4219
152	SAU	Saudi Arabia	developing	1.5	0%	1850	0.5	Equal per capita	409.013	-231.464	640.477
153	SDN	Sudan	ldc	1.5	0%	1850	0.5	Equal per capita	409.013	300.904	108.109
154	SEN	Senegal	ldc	1.5	0%	1850	0.5	Equal per capita	409.013	339.288	69.7248
155	SGP	Singapore	developing	1.5	0%	1850	0.5	Equal per capita	409.013	-16.9103	425.923
156	SLB	Solomon Islands	ldc	1.5	0%	1850	0.5	Equal per capita	409.013	372.109	36.904
157	SLE	Sierra Leone	ldc	1.5	0%	1850	0.5	Equal per capita	409.013	356.744	52.2685
158	SLV	El Salvador	developing	1.5	0%	1850	0.5	Equal per capita	409.013	242.952	166.06
159	SMR	San Marino	developed	1.5	0%	1850	0.5	Equal per capita	409.013	-247.813	656.826
160	SOM	Somalia	ldc	1.5	0%	1850	0.5	Equal per capita	409.013	301.541	107.471
161	SRB	Serbia	developed	1.5	0%	1850	0.5	Equal per capita	409.013	-676.792	1085.8
162	SSD	South Sudan	ldc	1.5	0%	1850	0.5	Equal per capita	409.013	62.5138	346.499
163	STP	Sao Tome and Principe	ldc	1.5	0%	1850	0.5	Equal per capita	409.013	367.338	41.6745
164	SUR	Suriname	developing	1.5	0%	1850	0.5	Equal per capita	409.013	-75.7154	484.728
165	SVK	Slovakia	developed	1.5	0%	1850	0.5	Equal per capita	409.013	-878.702	1287.71
166	SVN	Slovenia	developed	1.5	0%	1850	0.5	Equal per capita	409.013	-511.107	920.12
167	SWE	Sweden	developed	1.5	0%	1850	0.5	Equal per capita	409.013	-406.493	815.505
168	SWZ	Eswatini	developing	1.5	0%	1850	0.5	Equal per capita	409.013	219.112	189.901
169	SYC	Seychelles	developing	1.5	0%	1850	0.5	Equal per capita	409.013	110.419	298.593
170	SYR	Syria	developing	1.5	0%	1850	0.5	Equal per capita	409.013	265.379	143.634
171	TCA	Turks and Caicos Islands	developing	1.5	0%	1850	0.5	Equal per capita	409.013	251.238	157.774
172	TCD	Chad	ldc	1.5	0%	1850	0.5	Equal per capita	409.013	333.293	75.7196
173	TGO	Togo	ldc	1.5	0%	1850	0.5	Equal per capita	409.013	337.887	71.1256
174	THA	Thailand	developing	1.5	0%	1850	0.5	Equal per capita	409.013	47.4253	361.587
175	TJK	Tajikistan	developing	1.5	0%	1850	0.5	Equal per capita	409.013	277.955	131.057
176	TKM	Turkmenistan	developing	1.5	0%	1850	0.5	Equal per capita	409.013	-420.298	829.31
177	TLS	Timor-Leste	ldc	1.5	0%	1850	0.5	Equal per capita	409.013	231.977	177.036
178	TON	Tonga	developing	1.5	0%	1850	0.5	Equal per capita	409.013	210.882	198.13
179	TTO	Trinidad and Tobago	developing	1.5	0%	1850	0.5	Equal per capita	409.013	-2794.31	3203.32
180	TUN	Tunisia	developing	1.5	0%	1850	0.5	Equal per capita	409.013	200.321	208.691
181	TUR	Türkiye	developing	1.5	0%	1850	0.5	Equal per capita	409.013	153.416	255.596
182	TUV	Tuvalu	ldc	1.5	0%	1850	0.5	Equal per capita	409.013	251.176	157.837
183	TZA	Tanzania	ldc	1.5	0%	1850	0.5	Equal per capita	409.013	350.87	58.1426
184	UGA	Uganda	ldc	1.5	0%	1850	0.5	Equal per capita	409.013	363.608	45.4045
185	UKR	Ukraine	developed	1.5	0%	1850	0.5	Equal per capita	409.013	-1659.89	2068.91
186	URY	Uruguay	developing	1.5	0%	1850	0.5	Equal per capita	409.013	-911.804	1320.82
187	USA	United States	developed	1.5	0%	1850	0.5	Equal per capita	409.013	-1674.51	2083.52
188	UZB	Uzbekistan	developing	1.5	0%	1850	0.5	Equal per capita	409.013	-24.9087	433.921
189	VCT	St. Vincent and the Grenadines	developing	1.5	0%	1850	0.5	Equal per capita	409.013	127.067	281.945
190	VEN	Venezuela	developing	1.5	0%	1850	0.5	Equal per capita	409.013	-120.59	529.603
191	VGB	British Virgin Islands	developing	1.5	0%	1850	0.5	Equal per capita	409.013	129.758	279.255
192	VNM	Vietnam	developing	1.5	0%	1850	0.5	Equal per capita	409.013	250.247	158.765
193	VUT	Vanuatu	developing	1.5	0%	1850	0.5	Equal per capita	409.013	259.557	149.455
194	WSM	Samoa	developing	1.5	0%	1850	0.5	Equal per capita	409.013	265.867	143.146
195	YEM	Yemen	ldc	1.5	0%	1850	0.5	Equal per capita	409.013	354.891	54.1216
196	ZAF	South Africa	developing	1.5	0%	1850	0.5	Equal per capita	409.013	-104.855	513.867
197	ZMB	Zambia	ldc	1.5	0%	1850	0.5	Equal per capita	409.013	295.128	113.884
198	ZWE	Zimbabwe	developing	1.5	0%	1850	0.5	Equal per capita	409.013	276.472	132.541
199	ABW	Aruba	developing	1.5	50%	1850	0.5	10-year bond yield	421.37	-3853.23	4274.6
200	AFG	Afghanistan	ldc	1.5	50%	1850	0.5	10-year bond yield	538.352	499.796	38.5556
201	AGO	Angola	ldc	1.5	50%	1850	0.5	10-year bond yield	436.435	313.646	122.789
202	AIA	Anguilla	developing	1.5	50%	1850	0.5	10-year bond yield	421.37	-57.9503	479.32
203	ALB	Albania	developed	1.5	50%	1850	0.5	10-year bond yield	344.536	40.0632	304.473
204	AND	Andorra	developed	1.5	50%	1850	0.5	10-year bond yield	310.928	-196.582	507.51
205	ARE	United Arab Emirates	developing	1.5	50%	1850	0.5	10-year bond yield	421.37	-510.407	931.777
206	ARG	Argentina	developing	1.5	50%	1850	0.5	10-year bond yield	421.37	-125.576	546.946
207	ARM	Armenia	developing	1.5	50%	1850	0.5	10-year bond yield	421.37	-151.765	573.135
208	ATG	Antigua and Barbuda	developing	1.5	50%	1850	0.5	10-year bond yield	421.37	-79.6989	501.069
209	AUS	Australia	developed	1.5	50%	1850	0.5	10-year bond yield	292.712	-1028.86	1321.57
210	AUT	Austria	developed	1.5	50%	1850	0.5	10-year bond yield	274.701	-786.966	1061.67
211	AZE	Azerbaijan	developing	1.5	50%	1850	0.5	10-year bond yield	421.37	-257.629	678.999
212	BDI	Burundi	ldc	1.5	50%	1850	0.5	10-year bond yield	538.352	518.214	20.1378
213	BEL	Belgium	developed	1.5	50%	1850	0.5	10-year bond yield	275.303	-1339.09	1614.39
214	BEN	Benin	ldc	1.5	50%	1850	0.5	10-year bond yield	538.352	493.631	44.7201
215	BFA	Burkina Faso	ldc	1.5	50%	1850	0.5	10-year bond yield	538.352	490.503	47.849
216	BGD	Bangladesh	ldc	1.5	50%	1850	0.5	10-year bond yield	410.632	365.463	45.1684
217	BGR	Bulgaria	developed	1.5	50%	1850	0.5	10-year bond yield	321.834	-1120.26	1442.1
218	BHR	Bahrain	developing	1.5	50%	1850	0.5	10-year bond yield	344.25	-1820.85	2165.1
219	BHS	Bahamas	developing	1.5	50%	1850	0.5	10-year bond yield	421.37	-265.714	687.084
220	BIH	Bosnia and Herzegovina	developed	1.5	50%	1850	0.5	10-year bond yield	310.928	-691.905	1002.83
221	BLR	Belarus	developed	1.5	50%	1850	0.5	10-year bond yield	310.928	-939.281	1250.21
222	BLZ	Belize	developing	1.5	50%	1850	0.5	10-year bond yield	421.37	147.039	274.331
223	BOL	Bolivia	developing	1.5	50%	1850	0.5	10-year bond yield	421.37	240.4	180.97
224	BRA	Brazil	developing	1.5	50%	1850	0.5	10-year bond yield	527.023	152.473	374.55
225	BRB	Barbados	developing	1.5	50%	1850	0.5	10-year bond yield	421.37	-1359.96	1781.33
226	BRN	Brunei Darussalam	developing	1.5	50%	1850	0.5	10-year bond yield	421.37	-1851.06	2272.43
227	BTN	Bhutan	ldc	1.5	50%	1850	0.5	10-year bond yield	538.352	206.353	331.998
228	BWA	Botswana	developing	1.5	50%	1850	0.5	10-year bond yield	379.636	-69.4867	449.123
229	CAF	Central African Republic	ldc	1.5	50%	1850	0.5	10-year bond yield	538.352	288.668	249.683
230	CAN	Canada	developed	1.5	50%	1850	0.5	10-year bond yield	278.775	-1111.82	1390.59
231	CHE	Switzerland	developed	1.5	50%	1850	0.5	10-year bond yield	224.085	-384.057	608.142
232	CHL	Chile	developing	1.5	50%	1850	0.5	10-year bond yield	344.276	27.9488	316.327
233	CHN	China	developing	1.5	50%	1850	0.5	10-year bond yield	266.118	-150.701	416.819
234	CIV	Cote d'Ivoire	developing	1.5	50%	1850	0.5	10-year bond yield	421.37	374.304	47.0658
235	CMR	Cameroon	developing	1.5	50%	1850	0.5	10-year bond yield	421.37	349.663	71.7074
236	COD	DR Congo	ldc	1.5	50%	1850	0.5	10-year bond yield	538.352	504.193	34.1587
237	COG	Congo Republic	developing	1.5	50%	1850	0.5	10-year bond yield	421.37	210.234	211.136
238	COK	Cook Islands	developing	1.5	50%	1850	0.5	10-year bond yield	421.37	52.6816	368.688
239	COL	Colombia	developing	1.5	50%	1850	0.5	10-year bond yield	522.518	313.495	209.023
240	COM	Comoros	ldc	1.5	50%	1850	0.5	10-year bond yield	538.352	466.534	71.8179
241	CPV	Cabo Verde	developing	1.5	50%	1850	0.5	10-year bond yield	421.37	346.664	74.7056
242	CRI	Costa Rica	developing	1.5	50%	1850	0.5	10-year bond yield	421.37	210.761	210.609
243	CUB	Cuba	developing	1.5	50%	1850	0.5	10-year bond yield	421.37	-44.8871	466.257
244	CYP	Cyprus	developed	1.5	50%	1850	0.5	10-year bond yield	299.374	-158.703	458.077
245	CZE	Czech Republic	developed	1.5	50%	1850	0.5	10-year bond yield	318.932	-1366.55	1685.48
246	DEU	Germany	developed	1.5	50%	1850	0.5	10-year bond yield	257.386	-1631.79	1889.17
247	DJI	Djibouti	ldc	1.5	50%	1850	0.5	10-year bond yield	538.352	408.706	129.645
248	DMA	Dominica	developing	1.5	50%	1850	0.5	10-year bond yield	421.37	159.112	262.258
249	DNK	Denmark	developed	1.5	50%	1850	0.5	10-year bond yield	263.857	-961.573	1225.43
250	DOM	Dominican Republic	developing	1.5	50%	1850	0.5	10-year bond yield	421.37	236.049	185.321
251	DZA	Algeria	developing	1.5	50%	1850	0.5	10-year bond yield	421.37	170.375	250.995
252	ECU	Ecuador	developing	1.5	50%	1850	0.5	10-year bond yield	421.37	194.012	227.358
253	EGY	Egypt	developing	1.5	50%	1850	0.5	10-year bond yield	627.397	524.846	102.552
254	ERI	Eritrea	ldc	1.5	50%	1850	0.5	10-year bond yield	538.352	414.409	123.943
255	ESP	Spain	developed	1.5	50%	1850	0.5	10-year bond yield	285.584	-363.221	648.806
256	EST	Estonia	developed	1.5	50%	1850	0.5	10-year bond yield	310.928	-2445.27	2756.2
257	ETH	Ethiopia	ldc	1.5	50%	1850	0.5	10-year bond yield	364.575	317.205	47.3696
258	FIN	Finland	developed	1.5	50%	1850	0.5	10-year bond yield	272.139	-926.504	1198.64
259	FJI	Fiji	developing	1.5	50%	1850	0.5	10-year bond yield	421.37	170.62	250.75
260	FRA	France	developed	1.5	50%	1850	0.5	10-year bond yield	270.162	-774.73	1044.89
261	FSM	Micronesia, Fed. Sts.	developing	1.5	50%	1850	0.5	10-year bond yield	421.37	311.449	109.921
262	GAB	Gabon	developing	1.5	50%	1850	0.5	10-year bond yield	421.37	-133.106	554.476
263	GBR	United Kingdom	developed	1.5	50%	1850	0.5	10-year bond yield	290.805	-1442.77	1733.58
264	GEO	Georgia	developing	1.5	50%	1850	0.5	10-year bond yield	421.37	-627.507	1048.88
265	GHA	Ghana	developing	1.5	50%	1850	0.5	10-year bond yield	421.37	372.39	48.9796
266	GIN	Guinea	ldc	1.5	50%	1850	0.5	10-year bond yield	538.352	438.629	99.7229
267	GMB	Gambia	ldc	1.5	50%	1850	0.5	10-year bond yield	538.352	486.501	51.8508
268	GNB	Guinea-Bissau	ldc	1.5	50%	1850	0.5	10-year bond yield	538.352	439	99.3519
269	GNQ	Equatorial Guinea	developing	1.5	50%	1850	0.5	10-year bond yield	421.37	-25.0678	446.438
270	GRC	Greece	developed	1.5	50%	1850	0.5	10-year bond yield	305.897	-600.711	906.608
271	GRD	Grenada	developing	1.5	50%	1850	0.5	10-year bond yield	421.37	245.377	175.993
272	GTM	Guatemala	developing	1.5	50%	1850	0.5	10-year bond yield	421.37	321.165	100.205
273	GUY	Guyana	developing	1.5	50%	1850	0.5	10-year bond yield	421.37	-120.024	541.394
274	HND	Honduras	developing	1.5	50%	1850	0.5	10-year bond yield	421.37	334.292	87.0776
275	HRV	Croatia	developed	1.5	50%	1850	0.5	10-year bond yield	294.928	-502.369	797.297
276	HTI	Haiti	ldc	1.5	50%	1850	0.5	10-year bond yield	538.352	454.957	83.3943
277	HUN	Hungary	developed	1.5	50%	1850	0.5	10-year bond yield	416.45	-588.187	1004.64
278	IDN	Indonesia	developing	1.5	50%	1850	0.5	10-year bond yield	372.075	215.402	156.673
279	IND	India	developing	1.5	50%	1850	0.5	10-year bond yield	385.715	290.99	94.7255
280	IRL	Ireland	developed	1.5	50%	1850	0.5	10-year bond yield	270.656	-854.318	1124.97
281	IRN	Iran	developing	1.5	50%	1850	0.5	10-year bond yield	585.77	107.238	478.531
282	IRQ	Iraq	developing	1.5	50%	1850	0.5	10-year bond yield	366.499	140.329	226.17
283	ISL	Iceland	developed	1.5	50%	1850	0.5	10-year bond yield	384.034	-768.224	1152.26
284	ISR	Israel	developed	1.5	50%	1850	0.5	10-year bond yield	296.95	-109.842	406.793
285	ITA	Italy	developed	1.5	50%	1850	0.5	10-year bond yield	307.423	-559.373	866.796
286	JAM	Jamaica	developing	1.5	50%	1850	0.5	10-year bond yield	421.37	-194.982	616.352
287	JOR	Jordan	developing	1.5	50%	1850	0.5	10-year bond yield	275.303	150.813	124.49
288	JPN	Japan	developed	1.5	50%	1850	0.5	10-year bond yield	209.132	-776.949	986.081
289	KAZ	Kazakhstan	developing	1.5	50%	1850	0.5	10-year bond yield	522.906	-713.9	1236.81
290	KEN	Kenya	developing	1.5	50%	1850	0.5	10-year bond yield	552.523	479.572	72.9507
291	KGZ	Kyrgyz Republic	developing	1.5	50%	1850	0.5	10-year bond yield	421.37	151.618	269.752
292	KHM	Cambodia	ldc	1.5	50%	1850	0.5	10-year bond yield	538.352	377.451	160.901
293	KIR	Kiribati	ldc	1.5	50%	1850	0.5	10-year bond yield	538.352	505.351	33.0009
294	KNA	St. Kitts and Nevis	developing	1.5	50%	1850	0.5	10-year bond yield	421.37	-170.039	591.409
295	KOR	South Korea	developed	1.5	50%	1850	0.5	10-year bond yield	286.712	-405.333	692.044
296	KWT	Kuwait	developing	1.5	50%	1850	0.5	10-year bond yield	292.118	-1384.56	1676.68
297	LAO	Laos	ldc	1.5	50%	1850	0.5	10-year bond yield	538.352	390.594	147.758
298	LBN	Lebanon	developing	1.5	50%	1850	0.5	10-year bond yield	421.37	30.5825	390.788
299	LBR	Liberia	ldc	1.5	50%	1850	0.5	10-year bond yield	538.352	496.047	42.3043
300	LBY	Libya	developing	1.5	50%	1850	0.5	10-year bond yield	421.37	-383.07	804.44
301	LCA	St. Lucia	developing	1.5	50%	1850	0.5	10-year bond yield	421.37	181.028	240.342
302	LIE	Liechtenstein	developed	1.5	50%	1850	0.5	10-year bond yield	310.928	-370.941	681.869
303	LKA	Sri Lanka	developing	1.5	50%	1850	0.5	10-year bond yield	627.397	505.586	121.811
304	LSO	Lesotho	ldc	1.5	50%	1850	0.5	10-year bond yield	538.352	380.38	157.972
305	LTU	Lithuania	developed	1.5	50%	1850	0.5	10-year bond yield	312.923	-1404.38	1717.3
306	LUX	Luxembourg	developed	1.5	50%	1850	0.5	10-year bond yield	310.928	-1550.9	1861.83
307	LVA	Latvia	developed	1.5	50%	1850	0.5	10-year bond yield	256.499	-1200.74	1457.24
308	MAR	Morocco	developing	1.5	50%	1850	0.5	10-year bond yield	304.665	190.85	113.815
309	MCO	Monaco	developed	1.5	50%	1850	0.5	10-year bond yield	310.928	-111.214	422.141
310	MDA	Moldova	developed	1.5	50%	1850	0.5	10-year bond yield	310.928	-709.23	1020.16
311	MDG	Madagascar	ldc	1.5	50%	1850	0.5	10-year bond yield	538.352	463.147	75.2042
312	MDV	Maldives	developing	1.5	50%	1850	0.5	10-year bond yield	421.37	339.447	81.9229
313	MEX	Mexico	developing	1.5	50%	1850	0.5	10-year bond yield	435.68	100.946	334.734
314	MHL	Marshall Islands	developing	1.5	50%	1850	0.5	10-year bond yield	421.37	159.887	261.483
315	MKD	North Macedonia	developed	1.5	50%	1850	0.5	10-year bond yield	310.928	-442.58	753.508
316	MLI	Mali	ldc	1.5	50%	1850	0.5	10-year bond yield	538.352	461.694	76.6577
317	MLT	Malta	developed	1.5	50%	1850	0.5	10-year bond yield	284.959	-105.711	390.67
318	MMR	Myanmar	ldc	1.5	50%	1850	0.5	10-year bond yield	538.352	445.364	92.9881
319	MNE	Montenegro	developed	1.5	50%	1850	0.5	10-year bond yield	310.928	-324.985	635.912
320	MNG	Mongolia	developing	1.5	50%	1850	0.5	10-year bond yield	421.37	-310.093	731.463
321	MOZ	Mozambique	ldc	1.5	50%	1850	0.5	10-year bond yield	538.352	475.114	63.2375
322	MRT	Mauritania	ldc	1.5	50%	1850	0.5	10-year bond yield	538.352	429.677	108.674
323	MUS	Mauritius	developing	1.5	50%	1850	0.5	10-year bond yield	335.967	-36.0126	371.979
324	MWI	Malawi	ldc	1.5	50%	1850	0.5	10-year bond yield	538.352	510.784	27.5672
325	MYS	Malaysia	developing	1.5	50%	1850	0.5	10-year bond yield	294.158	-63.0357	357.194
326	NAM	Namibia	developing	1.5	50%	1850	0.5	10-year bond yield	359.818	-55.0298	414.848
327	NER	Niger	ldc	1.5	50%	1850	0.5	10-year bond yield	538.352	505.772	32.5799
328	NGA	Nigeria	developing	1.5	50%	1850	0.5	10-year bond yield	544.718	449.014	95.7035
329	NIC	Nicaragua	developing	1.5	50%	1850	0.5	10-year bond yield	421.37	240.525	180.845
330	NIU	Niue	developing	1.5	50%	1850	0.5	10-year bond yield	421.37	48.3052	373.065
331	NLD	Netherlands	developed	1.5	50%	1850	0.5	10-year bond yield	265.636	-1144.03	1409.67
332	NOR	Norway	developed	1.5	50%	1850	0.5	10-year bond yield	282.497	-774.622	1057.12
333	NPL	Nepal	ldc	1.5	50%	1850	0.5	10-year bond yield	538.352	425.433	112.919
334	NRU	Nauru	developing	1.5	50%	1850	0.5	10-year bond yield	421.37	175.267	246.104
335	NZL	New Zealand	developed	1.5	50%	1850	0.5	10-year bond yield	313.682	-983.283	1296.96
336	OMN	Oman	developing	1.5	50%	1850	0.5	10-year bond yield	421.37	-404.535	825.905
337	PAK	Pakistan	developing	1.5	50%	1850	0.5	10-year bond yield	581.816	497.767	84.0497
338	PAN	Panama	developing	1.5	50%	1850	0.5	10-year bond yield	421.37	216.05	205.32
339	PER	Peru	developing	1.5	50%	1850	0.5	10-year bond yield	400.27	213.651	186.619
340	PHL	Philippines	developing	1.5	50%	1850	0.5	10-year bond yield	357.962	270.485	87.4769
341	PLW	Palau	developing	1.5	50%	1850	0.5	10-year bond yield	421.37	-2624.13	3045.5
342	PNG	Papua New Guinea	developing	1.5	50%	1850	0.5	10-year bond yield	421.37	331.509	89.861
343	POL	Poland	developed	1.5	50%	1850	0.5	10-year bond yield	363.06	-1022.84	1385.9
344	PRK	North Korea	developing	1.5	50%	1850	0.5	10-year bond yield	421.37	-42.6067	463.977
345	PRT	Portugal	developed	1.5	50%	1850	0.5	10-year bond yield	281.162	-374.559	655.722
346	PRY	Paraguay	developing	1.5	50%	1850	0.5	10-year bond yield	421.37	-57.5219	478.892
347	QAT	Qatar	developing	1.5	50%	1850	0.5	10-year bond yield	296.303	-2395.77	2692.07
348	ROU	Romania	developed	1.5	50%	1850	0.5	10-year bond yield	394.407	-577.739	972.146
349	RUS	Russia	developed	1.5	50%	1850	0.5	10-year bond yield	472.271	-1290.62	1762.89
350	RWA	Rwanda	ldc	1.5	50%	1850	0.5	10-year bond yield	538.352	508.93	29.4219
351	SAU	Saudi Arabia	developing	1.5	50%	1850	0.5	10-year bond yield	303.833	-336.643	640.477
352	SDN	Sudan	ldc	1.5	50%	1850	0.5	10-year bond yield	538.352	430.243	108.109
353	SEN	Senegal	ldc	1.5	50%	1850	0.5	10-year bond yield	538.352	468.627	69.7248
354	SGP	Singapore	developing	1.5	50%	1850	0.5	10-year bond yield	278.461	-147.462	425.923
355	SLB	Solomon Islands	ldc	1.5	50%	1850	0.5	10-year bond yield	538.352	501.448	36.904
356	SLE	Sierra Leone	ldc	1.5	50%	1850	0.5	10-year bond yield	538.352	486.083	52.2685
357	SLV	El Salvador	developing	1.5	50%	1850	0.5	10-year bond yield	421.37	255.31	166.06
358	SMR	San Marino	developed	1.5	50%	1850	0.5	10-year bond yield	310.928	-345.898	656.826
359	SOM	Somalia	ldc	1.5	50%	1850	0.5	10-year bond yield	538.352	430.88	107.471
360	SRB	Serbia	developed	1.5	50%	1850	0.5	10-year bond yield	379.915	-705.889	1085.8
361	SSD	South Sudan	ldc	1.5	50%	1850	0.5	10-year bond yield	538.352	191.853	346.499
362	STP	Sao Tome and Principe	ldc	1.5	50%	1850	0.5	10-year bond yield	538.352	496.677	41.6745
363	SUR	Suriname	developing	1.5	50%	1850	0.5	10-year bond yield	421.37	-63.3578	484.728
364	SVK	Slovakia	developed	1.5	50%	1850	0.5	10-year bond yield	283.123	-1004.59	1287.71
365	SVN	Slovenia	developed	1.5	50%	1850	0.5	10-year bond yield	289.451	-630.669	920.12
366	SWE	Sweden	developed	1.5	50%	1850	0.5	10-year bond yield	259.948	-555.558	815.505
367	SWZ	Eswatini	developing	1.5	50%	1850	0.5	10-year bond yield	421.37	231.469	189.901
368	SYC	Seychelles	developing	1.5	50%	1850	0.5	10-year bond yield	421.37	122.777	298.593
369	SYR	Syria	developing	1.5	50%	1850	0.5	10-year bond yield	421.37	277.736	143.634
370	TCA	Turks and Caicos Islands	developing	1.5	50%	1850	0.5	10-year bond yield	421.37	263.596	157.774
371	TCD	Chad	ldc	1.5	50%	1850	0.5	10-year bond yield	538.352	462.632	75.7196
372	TGO	Togo	ldc	1.5	50%	1850	0.5	10-year bond yield	538.352	467.226	71.1256
373	THA	Thailand	developing	1.5	50%	1850	0.5	10-year bond yield	255.625	-105.962	361.587
374	TJK	Tajikistan	developing	1.5	50%	1850	0.5	10-year bond yield	421.37	290.313	131.057
375	TKM	Turkmenistan	developing	1.5	50%	1850	0.5	10-year bond yield	421.37	-407.94	829.31
376	TLS	Timor-Leste	ldc	1.5	50%	1850	0.5	10-year bond yield	538.352	361.316	177.036
377	TON	Tonga	developing	1.5	50%	1850	0.5	10-year bond yield	421.37	223.24	198.13
378	TTO	Trinidad and Tobago	developing	1.5	50%	1850	0.5	10-year bond yield	421.37	-2781.95	3203.32
379	TUN	Tunisia	developing	1.5	50%	1850	0.5	10-year bond yield	421.37	212.679	208.691
380	TUR	Türkiye	developing	1.5	50%	1850	0.5	10-year bond yield	454.804	199.208	255.596
381	TUV	Tuvalu	ldc	1.5	50%	1850	0.5	10-year bond yield	538.352	380.515	157.837
382	TZA	Tanzania	ldc	1.5	50%	1850	0.5	10-year bond yield	513.484	455.341	58.1426
383	UGA	Uganda	ldc	1.5	50%	1850	0.5	10-year bond yield	579.9	534.496	45.4045
384	UKR	Ukraine	developed	1.5	50%	1850	0.5	10-year bond yield	600.367	-1468.54	2068.91
385	URY	Uruguay	developing	1.5	50%	1850	0.5	10-year bond yield	421.37	-899.446	1320.82
386	USA	United States	developed	1.5	50%	1850	0.5	10-year bond yield	294.149	-1789.38	2083.52
387	UZB	Uzbekistan	developing	1.5	50%	1850	0.5	10-year bond yield	421.37	-12.5512	433.921
388	VCT	St. Vincent and the Grenadines	developing	1.5	50%	1850	0.5	10-year bond yield	421.37	139.425	281.945
389	VEN	Venezuela	developing	1.5	50%	1850	0.5	10-year bond yield	458.855	-70.748	529.603
390	VGB	British Virgin Islands	developing	1.5	50%	1850	0.5	10-year bond yield	421.37	142.115	279.255
391	VNM	Vietnam	developing	1.5	50%	1850	0.5	10-year bond yield	309.281	150.515	158.765
392	VUT	Vanuatu	developing	1.5	50%	1850	0.5	10-year bond yield	421.37	271.915	149.455
393	WSM	Samoa	developing	1.5	50%	1850	0.5	10-year bond yield	421.37	278.224	143.146
394	YEM	Yemen	ldc	1.5	50%	1850	0.5	10-year bond yield	538.352	484.23	54.1216
395	ZAF	South Africa	developing	1.5	50%	1850	0.5	10-year bond yield	451.018	-62.8491	513.867
396	ZMB	Zambia	ldc	1.5	50%	1850	0.5	10-year bond yield	627.397	513.513	113.884
397	ZWE	Zimbabwe	developing	1.5	50%	1850	0.5	10-year bond yield	421.37	288.83	132.541
398	ABW	Aruba	developing	1.5	50%	1850	0.5	Historical fossil fuel sales (not considering colonies)	423.502	-3851.1	4274.6
399	AFG	Afghanistan	ldc	1.5	50%	1850	0.5	Historical fossil fuel sales (not considering colonies)	423.298	384.743	38.5556
400	AGO	Angola	ldc	1.5	50%	1850	0.5	Historical fossil fuel sales (not considering colonies)	405.114	282.325	122.789
401	AIA	Anguilla	developing	1.5	50%	1850	0.5	Historical fossil fuel sales (not considering colonies)	423.502	-55.818	479.32
402	ALB	Albania	developed	1.5	50%	1850	0.5	Historical fossil fuel sales (not considering colonies)	405.472	100.999	304.473
403	AND	Andorra	developed	1.5	50%	1850	0.5	Historical fossil fuel sales (not considering colonies)	423.502	-84.0075	507.51
404	ARE	United Arab Emirates	developing	1.5	50%	1850	0.5	Historical fossil fuel sales (not considering colonies)	197.251	-734.526	931.777
405	ARG	Argentina	developing	1.5	50%	1850	0.5	Historical fossil fuel sales (not considering colonies)	399.552	-147.394	546.946
406	ARM	Armenia	developing	1.5	50%	1850	0.5	Historical fossil fuel sales (not considering colonies)	423.502	-149.632	573.135
407	ATG	Antigua and Barbuda	developing	1.5	50%	1850	0.5	Historical fossil fuel sales (not considering colonies)	423.502	-77.5667	501.069
408	AUS	Australia	developed	1.5	50%	1850	0.5	Historical fossil fuel sales (not considering colonies)	356.637	-964.932	1321.57
409	AUT	Austria	developed	1.5	50%	1850	0.5	Historical fossil fuel sales (not considering colonies)	412.569	-649.099	1061.67
410	AZE	Azerbaijan	developing	1.5	50%	1850	0.5	Historical fossil fuel sales (not considering colonies)	356.131	-322.867	678.999
411	BDI	Burundi	ldc	1.5	50%	1850	0.5	Historical fossil fuel sales (not considering colonies)	423.502	403.364	20.1378
412	BEL	Belgium	developed	1.5	50%	1850	0.5	Historical fossil fuel sales (not considering colonies)	415.148	-1199.24	1614.39
413	BEN	Benin	ldc	1.5	50%	1850	0.5	Historical fossil fuel sales (not considering colonies)	423.431	378.71	44.7201
414	BFA	Burkina Faso	ldc	1.5	50%	1850	0.5	Historical fossil fuel sales (not considering colonies)	423.502	375.653	47.849
415	BGD	Bangladesh	ldc	1.5	50%	1850	0.5	Historical fossil fuel sales (not considering colonies)	422.891	377.722	45.1684
416	BGR	Bulgaria	developed	1.5	50%	1850	0.5	Historical fossil fuel sales (not considering colonies)	411.53	-1030.57	1442.1
417	BHR	Bahrain	developing	1.5	50%	1850	0.5	Historical fossil fuel sales (not considering colonies)	325.416	-1839.69	2165.1
418	BHS	Bahamas	developing	1.5	50%	1850	0.5	Historical fossil fuel sales (not considering colonies)	423.502	-263.582	687.084
419	BIH	Bosnia and Herzegovina	developed	1.5	50%	1850	0.5	Historical fossil fuel sales (not considering colonies)	421.357	-581.476	1002.83
420	BLR	Belarus	developed	1.5	50%	1850	0.5	Historical fossil fuel sales (not considering colonies)	420.238	-829.971	1250.21
421	BLZ	Belize	developing	1.5	50%	1850	0.5	Historical fossil fuel sales (not considering colonies)	420.537	146.206	274.331
422	BOL	Bolivia	developing	1.5	50%	1850	0.5	Historical fossil fuel sales (not considering colonies)	414.817	233.847	180.97
423	BRA	Brazil	developing	1.5	50%	1850	0.5	Historical fossil fuel sales (not considering colonies)	414.345	39.7945	374.55
424	BRB	Barbados	developing	1.5	50%	1850	0.5	Historical fossil fuel sales (not considering colonies)	417.531	-1363.8	1781.33
425	BRN	Brunei Darussalam	developing	1.5	50%	1850	0.5	Historical fossil fuel sales (not considering colonies)	197.251	-2075.17	2272.43
426	BTN	Bhutan	ldc	1.5	50%	1850	0.5	Historical fossil fuel sales (not considering colonies)	423.394	91.3953	331.998
427	BWA	Botswana	developing	1.5	50%	1850	0.5	Historical fossil fuel sales (not considering colonies)	422.849	-26.2734	449.123
428	CAF	Central African Republic	ldc	1.5	50%	1850	0.5	Historical fossil fuel sales (not considering colonies)	423.502	173.819	249.683
429	CAN	Canada	developed	1.5	50%	1850	0.5	Historical fossil fuel sales (not considering colonies)	293.672	-1096.92	1390.59
430	CHE	Switzerland	developed	1.5	50%	1850	0.5	Historical fossil fuel sales (not considering colonies)	423.5	-184.642	608.142
431	CHL	Chile	developing	1.5	50%	1850	0.5	Historical fossil fuel sales (not considering colonies)	420.376	104.049	316.327
432	CHN	China	developing	1.5	50%	1850	0.5	Historical fossil fuel sales (not considering colonies)	415.231	-1.58769	416.819
433	CIV	Cote d'Ivoire	developing	1.5	50%	1850	0.5	Historical fossil fuel sales (not considering colonies)	422.676	375.61	47.0658
434	CMR	Cameroon	developing	1.5	50%	1850	0.5	Historical fossil fuel sales (not considering colonies)	421.252	349.544	71.7074
435	COD	DR Congo	ldc	1.5	50%	1850	0.5	Historical fossil fuel sales (not considering colonies)	423.361	389.203	34.1587
436	COG	Congo Republic	developing	1.5	50%	1850	0.5	Historical fossil fuel sales (not considering colonies)	396.647	185.511	211.136
437	COK	Cook Islands	developing	1.5	50%	1850	0.5	Historical fossil fuel sales (not considering colonies)	423.502	54.8139	368.688
438	COL	Colombia	developing	1.5	50%	1850	0.5	Historical fossil fuel sales (not considering colonies)	404.611	195.587	209.023
439	COM	Comoros	ldc	1.5	50%	1850	0.5	Historical fossil fuel sales (not considering colonies)	423.502	351.684	71.8179
440	CPV	Cabo Verde	developing	1.5	50%	1850	0.5	Historical fossil fuel sales (not considering colonies)	423.502	348.797	74.7056
441	CRI	Costa Rica	developing	1.5	50%	1850	0.5	Historical fossil fuel sales (not considering colonies)	423.502	212.894	210.609
442	CUB	Cuba	developing	1.5	50%	1850	0.5	Historical fossil fuel sales (not considering colonies)	418.328	-47.9295	466.257
443	CYP	Cyprus	developed	1.5	50%	1850	0.5	Historical fossil fuel sales (not considering colonies)	423.502	-34.5749	458.077
444	CZE	Czech Republic	developed	1.5	50%	1850	0.5	Historical fossil fuel sales (not considering colonies)	409.437	-1276.04	1685.48
445	DEU	Germany	developed	1.5	50%	1850	0.5	Historical fossil fuel sales (not considering colonies)	403.066	-1486.11	1889.17
446	DJI	Djibouti	ldc	1.5	50%	1850	0.5	Historical fossil fuel sales (not considering colonies)	423.502	293.857	129.645
447	DMA	Dominica	developing	1.5	50%	1850	0.5	Historical fossil fuel sales (not considering colonies)	423.502	161.245	262.258
448	DNK	Denmark	developed	1.5	50%	1850	0.5	Historical fossil fuel sales (not considering colonies)	381.195	-844.235	1225.43
449	DOM	Dominican Republic	developing	1.5	50%	1850	0.5	Historical fossil fuel sales (not considering colonies)	423.502	238.181	185.321
450	DZA	Algeria	developing	1.5	50%	1850	0.5	Historical fossil fuel sales (not considering colonies)	380.543	129.548	250.995
451	ECU	Ecuador	developing	1.5	50%	1850	0.5	Historical fossil fuel sales (not considering colonies)	397.017	169.659	227.358
452	EGY	Egypt	developing	1.5	50%	1850	0.5	Historical fossil fuel sales (not considering colonies)	415.48	312.928	102.552
453	ERI	Eritrea	ldc	1.5	50%	1850	0.5	Historical fossil fuel sales (not considering colonies)	423.502	299.559	123.943
454	ESP	Spain	developed	1.5	50%	1850	0.5	Historical fossil fuel sales (not considering colonies)	420.917	-227.889	648.806
455	EST	Estonia	developed	1.5	50%	1850	0.5	Historical fossil fuel sales (not considering colonies)	423.502	-2332.7	2756.2
456	ETH	Ethiopia	ldc	1.5	50%	1850	0.5	Historical fossil fuel sales (not considering colonies)	423.502	376.133	47.3696
457	FIN	Finland	developed	1.5	50%	1850	0.5	Historical fossil fuel sales (not considering colonies)	423.502	-775.14	1198.64
458	FJI	Fiji	developing	1.5	50%	1850	0.5	Historical fossil fuel sales (not considering colonies)	423.502	172.752	250.75
459	FRA	France	developed	1.5	50%	1850	0.5	Historical fossil fuel sales (not considering colonies)	418.751	-626.142	1044.89
460	FSM	Micronesia, Fed. Sts.	developing	1.5	50%	1850	0.5	Historical fossil fuel sales (not considering colonies)	423.502	313.582	109.921
461	GAB	Gabon	developing	1.5	50%	1850	0.5	Historical fossil fuel sales (not considering colonies)	338.031	-216.445	554.476
462	GBR	United Kingdom	developed	1.5	50%	1850	0.5	Historical fossil fuel sales (not considering colonies)	369.409	-1364.17	1733.58
463	GEO	Georgia	developing	1.5	50%	1850	0.5	Historical fossil fuel sales (not considering colonies)	423.113	-625.763	1048.88
464	GHA	Ghana	developing	1.5	50%	1850	0.5	Historical fossil fuel sales (not considering colonies)	422.914	373.934	48.9796
465	GIN	Guinea	ldc	1.5	50%	1850	0.5	Historical fossil fuel sales (not considering colonies)	423.502	323.779	99.7229
466	GMB	Gambia	ldc	1.5	50%	1850	0.5	Historical fossil fuel sales (not considering colonies)	423.502	371.651	51.8508
467	GNB	Guinea-Bissau	ldc	1.5	50%	1850	0.5	Historical fossil fuel sales (not considering colonies)	423.502	324.15	99.3519
468	GNQ	Equatorial Guinea	developing	1.5	50%	1850	0.5	Historical fossil fuel sales (not considering colonies)	343.898	-102.54	446.438
469	GRC	Greece	developed	1.5	50%	1850	0.5	Historical fossil fuel sales (not considering colonies)	418.17	-488.438	906.608
470	GRD	Grenada	developing	1.5	50%	1850	0.5	Historical fossil fuel sales (not considering colonies)	423.502	247.509	175.993
471	GTM	Guatemala	developing	1.5	50%	1850	0.5	Historical fossil fuel sales (not considering colonies)	422.977	322.772	100.205
472	GUY	Guyana	developing	1.5	50%	1850	0.5	Historical fossil fuel sales (not considering colonies)	423.502	-117.892	541.394
473	HND	Honduras	developing	1.5	50%	1850	0.5	Historical fossil fuel sales (not considering colonies)	423.502	336.425	87.0776
474	HRV	Croatia	developed	1.5	50%	1850	0.5	Historical fossil fuel sales (not considering colonies)	414.65	-382.647	797.297
475	HTI	Haiti	ldc	1.5	50%	1850	0.5	Historical fossil fuel sales (not considering colonies)	423.502	340.108	83.3943
476	HUN	Hungary	developed	1.5	50%	1850	0.5	Historical fossil fuel sales (not considering colonies)	404.802	-599.835	1004.64
477	IDN	Indonesia	developing	1.5	50%	1850	0.5	Historical fossil fuel sales (not considering colonies)	414.031	257.358	156.673
478	IND	India	developing	1.5	50%	1850	0.5	Historical fossil fuel sales (not considering colonies)	422.202	327.476	94.7255
479	IRL	Ireland	developed	1.5	50%	1850	0.5	Historical fossil fuel sales (not considering colonies)	420.954	-704.02	1124.97
480	IRN	Iran	developing	1.5	50%	1850	0.5	Historical fossil fuel sales (not considering colonies)	360.056	-118.476	478.531
481	IRQ	Iraq	developing	1.5	50%	1850	0.5	Historical fossil fuel sales (not considering colonies)	375.339	149.169	226.17
482	ISL	Iceland	developed	1.5	50%	1850	0.5	Historical fossil fuel sales (not considering colonies)	423.502	-728.756	1152.26
483	ISR	Israel	developed	1.5	50%	1850	0.5	Historical fossil fuel sales (not considering colonies)	422.318	15.5257	406.793
484	ITA	Italy	developed	1.5	50%	1850	0.5	Historical fossil fuel sales (not considering colonies)	418.074	-448.722	866.796
485	JAM	Jamaica	developing	1.5	50%	1850	0.5	Historical fossil fuel sales (not considering colonies)	423.502	-192.85	616.352
486	JOR	Jordan	developing	1.5	50%	1850	0.5	Historical fossil fuel sales (not considering colonies)	423.374	298.884	124.49
487	JPN	Japan	developed	1.5	50%	1850	0.5	Historical fossil fuel sales (not considering colonies)	421.185	-564.896	986.081
488	KAZ	Kazakhstan	developing	1.5	50%	1850	0.5	Historical fossil fuel sales (not considering colonies)	361.223	-875.583	1236.81
489	KEN	Kenya	developing	1.5	50%	1850	0.5	Historical fossil fuel sales (not considering colonies)	423.502	350.552	72.9507
490	KGZ	Kyrgyz Republic	developing	1.5	50%	1850	0.5	Historical fossil fuel sales (not considering colonies)	423.27	153.518	269.752
491	KHM	Cambodia	ldc	1.5	50%	1850	0.5	Historical fossil fuel sales (not considering colonies)	423.502	262.602	160.901
492	KIR	Kiribati	ldc	1.5	50%	1850	0.5	Historical fossil fuel sales (not considering colonies)	423.502	390.501	33.0009
493	KNA	St. Kitts and Nevis	developing	1.5	50%	1850	0.5	Historical fossil fuel sales (not considering colonies)	423.502	-167.907	591.409
494	KOR	South Korea	developed	1.5	50%	1850	0.5	Historical fossil fuel sales (not considering colonies)	422.458	-269.586	692.044
495	KWT	Kuwait	developing	1.5	50%	1850	0.5	Historical fossil fuel sales (not considering colonies)	197.251	-1479.43	1676.68
496	LAO	Laos	ldc	1.5	50%	1850	0.5	Historical fossil fuel sales (not considering colonies)	423.413	275.656	147.758
497	LBN	Lebanon	developing	1.5	50%	1850	0.5	Historical fossil fuel sales (not considering colonies)	423.502	32.7148	390.788
498	LBR	Liberia	ldc	1.5	50%	1850	0.5	Historical fossil fuel sales (not considering colonies)	423.502	381.198	42.3043
499	LBY	Libya	developing	1.5	50%	1850	0.5	Historical fossil fuel sales (not considering colonies)	197.251	-607.189	804.44
500	LCA	St. Lucia	developing	1.5	50%	1850	0.5	Historical fossil fuel sales (not considering colonies)	423.502	183.16	240.342
501	LIE	Liechtenstein	developed	1.5	50%	1850	0.5	Historical fossil fuel sales (not considering colonies)	423.502	-258.366	681.869
502	LKA	Sri Lanka	developing	1.5	50%	1850	0.5	Historical fossil fuel sales (not considering colonies)	423.502	301.691	121.811
503	LSO	Lesotho	ldc	1.5	50%	1850	0.5	Historical fossil fuel sales (not considering colonies)	423.502	265.53	157.972
504	LTU	Lithuania	developed	1.5	50%	1850	0.5	Historical fossil fuel sales (not considering colonies)	422.351	-1294.95	1717.3
505	LUX	Luxembourg	developed	1.5	50%	1850	0.5	Historical fossil fuel sales (not considering colonies)	423.502	-1438.33	1861.83
506	LVA	Latvia	developed	1.5	50%	1850	0.5	Historical fossil fuel sales (not considering colonies)	423.502	-1033.74	1457.24
507	MAR	Morocco	developing	1.5	50%	1850	0.5	Historical fossil fuel sales (not considering colonies)	423.398	309.583	113.815
508	MCO	Monaco	developed	1.5	50%	1850	0.5	Historical fossil fuel sales (not considering colonies)	423.502	1.36109	422.141
509	MDA	Moldova	developed	1.5	50%	1850	0.5	Historical fossil fuel sales (not considering colonies)	423.483	-596.674	1020.16
510	MDG	Madagascar	ldc	1.5	50%	1850	0.5	Historical fossil fuel sales (not considering colonies)	423.502	348.298	75.2042
511	MDV	Maldives	developing	1.5	50%	1850	0.5	Historical fossil fuel sales (not considering colonies)	423.502	341.579	81.9229
512	MEX	Mexico	developing	1.5	50%	1850	0.5	Historical fossil fuel sales (not considering colonies)	393.506	58.7718	334.734
513	MHL	Marshall Islands	developing	1.5	50%	1850	0.5	Historical fossil fuel sales (not considering colonies)	423.502	162.02	261.483
514	MKD	North Macedonia	developed	1.5	50%	1850	0.5	Historical fossil fuel sales (not considering colonies)	421.883	-331.625	753.508
515	MLI	Mali	ldc	1.5	50%	1850	0.5	Historical fossil fuel sales (not considering colonies)	423.502	346.845	76.6577
516	MLT	Malta	developed	1.5	50%	1850	0.5	Historical fossil fuel sales (not considering colonies)	423.502	32.8323	390.67
517	MMR	Myanmar	ldc	1.5	50%	1850	0.5	Historical fossil fuel sales (not considering colonies)	421.632	328.644	92.9881
518	MNE	Montenegro	developed	1.5	50%	1850	0.5	Historical fossil fuel sales (not considering colonies)	422.508	-213.405	635.912
519	MNG	Mongolia	developing	1.5	50%	1850	0.5	Historical fossil fuel sales (not considering colonies)	413.494	-317.969	731.463
520	MOZ	Mozambique	ldc	1.5	50%	1850	0.5	Historical fossil fuel sales (not considering colonies)	423.205	359.968	63.2375
521	MRT	Mauritania	ldc	1.5	50%	1850	0.5	Historical fossil fuel sales (not considering colonies)	422.892	314.218	108.674
522	MUS	Mauritius	developing	1.5	50%	1850	0.5	Historical fossil fuel sales (not considering colonies)	423.502	51.5231	371.979
523	MWI	Malawi	ldc	1.5	50%	1850	0.5	Historical fossil fuel sales (not considering colonies)	423.499	395.931	27.5672
524	MYS	Malaysia	developing	1.5	50%	1850	0.5	Historical fossil fuel sales (not considering colonies)	394.152	36.9587	357.194
525	NAM	Namibia	developing	1.5	50%	1850	0.5	Historical fossil fuel sales (not considering colonies)	423.502	8.65446	414.848
526	NER	Niger	ldc	1.5	50%	1850	0.5	Historical fossil fuel sales (not considering colonies)	423.425	390.845	32.5799
527	NGA	Nigeria	developing	1.5	50%	1850	0.5	Historical fossil fuel sales (not considering colonies)	415.507	319.804	95.7035
528	NIC	Nicaragua	developing	1.5	50%	1850	0.5	Historical fossil fuel sales (not considering colonies)	423.502	242.657	180.845
529	NIU	Niue	developing	1.5	50%	1850	0.5	Historical fossil fuel sales (not considering colonies)	423.502	50.4375	373.065
530	NLD	Netherlands	developed	1.5	50%	1850	0.5	Historical fossil fuel sales (not considering colonies)	373.584	-1036.09	1409.67
531	NOR	Norway	developed	1.5	50%	1850	0.5	Historical fossil fuel sales (not considering colonies)	197.251	-859.868	1057.12
532	NPL	Nepal	ldc	1.5	50%	1850	0.5	Historical fossil fuel sales (not considering colonies)	423.502	310.583	112.919
533	NRU	Nauru	developing	1.5	50%	1850	0.5	Historical fossil fuel sales (not considering colonies)	423.502	177.399	246.104
534	NZL	New Zealand	developed	1.5	50%	1850	0.5	Historical fossil fuel sales (not considering colonies)	404.978	-891.987	1296.96
535	OMN	Oman	developing	1.5	50%	1850	0.5	Historical fossil fuel sales (not considering colonies)	245.997	-579.907	825.905
536	PAK	Pakistan	developing	1.5	50%	1850	0.5	Historical fossil fuel sales (not considering colonies)	422.635	338.586	84.0497
537	PAN	Panama	developing	1.5	50%	1850	0.5	Historical fossil fuel sales (not considering colonies)	423.502	218.183	205.32
538	PER	Peru	developing	1.5	50%	1850	0.5	Historical fossil fuel sales (not considering colonies)	417.556	230.937	186.619
539	PHL	Philippines	developing	1.5	50%	1850	0.5	Historical fossil fuel sales (not considering colonies)	423.224	335.748	87.4769
540	PLW	Palau	developing	1.5	50%	1850	0.5	Historical fossil fuel sales (not considering colonies)	423.502	-2622	3045.5
541	PNG	Papua New Guinea	developing	1.5	50%	1850	0.5	Historical fossil fuel sales (not considering colonies)	420.748	330.887	89.861
542	POL	Poland	developed	1.5	50%	1850	0.5	Historical fossil fuel sales (not considering colonies)	397.796	-988.102	1385.9
543	PRK	North Korea	developing	1.5	50%	1850	0.5	Historical fossil fuel sales (not considering colonies)	418.195	-45.7816	463.977
544	PRT	Portugal	developed	1.5	50%	1850	0.5	Historical fossil fuel sales (not considering colonies)	423.324	-232.398	655.722
545	PRY	Paraguay	developing	1.5	50%	1850	0.5	Historical fossil fuel sales (not considering colonies)	423.502	-55.3897	478.892
546	QAT	Qatar	developing	1.5	50%	1850	0.5	Historical fossil fuel sales (not considering colonies)	197.251	-2494.82	2692.07
547	ROU	Romania	developed	1.5	50%	1850	0.5	Historical fossil fuel sales (not considering colonies)	388.995	-583.15	972.146
548	RUS	Russia	developed	1.5	50%	1850	0.5	Historical fossil fuel sales (not considering colonies)	304.911	-1457.98	1762.89
549	RWA	Rwanda	ldc	1.5	50%	1850	0.5	Historical fossil fuel sales (not considering colonies)	423.502	394.08	29.4219
550	SAU	Saudi Arabia	developing	1.5	50%	1850	0.5	Historical fossil fuel sales (not considering colonies)	197.251	-443.226	640.477
551	SDN	Sudan	ldc	1.5	50%	1850	0.5	Historical fossil fuel sales (not considering colonies)	421.402	313.293	108.109
552	SEN	Senegal	ldc	1.5	50%	1850	0.5	Historical fossil fuel sales (not considering colonies)	423.493	353.768	69.7248
553	SGP	Singapore	developing	1.5	50%	1850	0.5	Historical fossil fuel sales (not considering colonies)	423.502	-2.42047	425.923
554	SLB	Solomon Islands	ldc	1.5	50%	1850	0.5	Historical fossil fuel sales (not considering colonies)	423.502	386.598	36.904
555	SLE	Sierra Leone	ldc	1.5	50%	1850	0.5	Historical fossil fuel sales (not considering colonies)	423.502	371.234	52.2685
556	SLV	El Salvador	developing	1.5	50%	1850	0.5	Historical fossil fuel sales (not considering colonies)	423.502	257.442	166.06
557	SMR	San Marino	developed	1.5	50%	1850	0.5	Historical fossil fuel sales (not considering colonies)	423.502	-233.323	656.826
558	SOM	Somalia	ldc	1.5	50%	1850	0.5	Historical fossil fuel sales (not considering colonies)	423.502	316.031	107.471
559	SRB	Serbia	developed	1.5	50%	1850	0.5	Historical fossil fuel sales (not considering colonies)	416.034	-669.771	1085.8
560	SSD	South Sudan	ldc	1.5	50%	1850	0.5	Historical fossil fuel sales (not considering colonies)	421.054	74.5549	346.499
561	STP	Sao Tome and Principe	ldc	1.5	50%	1850	0.5	Historical fossil fuel sales (not considering colonies)	423.502	381.828	41.6745
562	SUR	Suriname	developing	1.5	50%	1850	0.5	Historical fossil fuel sales (not considering colonies)	407.751	-76.9772	484.728
563	SVK	Slovakia	developed	1.5	50%	1850	0.5	Historical fossil fuel sales (not considering colonies)	422.787	-864.928	1287.71
564	SVN	Slovenia	developed	1.5	50%	1850	0.5	Historical fossil fuel sales (not considering colonies)	421.685	-498.435	920.12
565	SWE	Sweden	developed	1.5	50%	1850	0.5	Historical fossil fuel sales (not considering colonies)	423.369	-392.137	815.505
566	SWZ	Eswatini	developing	1.5	50%	1850	0.5	Historical fossil fuel sales (not considering colonies)	423.054	233.153	189.901
567	SYC	Seychelles	developing	1.5	50%	1850	0.5	Historical fossil fuel sales (not considering colonies)	423.502	124.909	298.593
568	SYR	Syria	developing	1.5	50%	1850	0.5	Historical fossil fuel sales (not considering colonies)	412.914	269.28	143.634
569	TCA	Turks and Caicos Islands	developing	1.5	50%	1850	0.5	Historical fossil fuel sales (not considering colonies)	423.502	265.728	157.774
570	TCD	Chad	ldc	1.5	50%	1850	0.5	Historical fossil fuel sales (not considering colonies)	421.13	345.41	75.7196
571	TGO	Togo	ldc	1.5	50%	1850	0.5	Historical fossil fuel sales (not considering colonies)	423.502	352.377	71.1256
572	THA	Thailand	developing	1.5	50%	1850	0.5	Historical fossil fuel sales (not considering colonies)	416.69	55.1027	361.587
573	TJK	Tajikistan	developing	1.5	50%	1850	0.5	Historical fossil fuel sales (not considering colonies)	423.439	292.382	131.057
574	TKM	Turkmenistan	developing	1.5	50%	1850	0.5	Historical fossil fuel sales (not considering colonies)	338.14	-491.17	829.31
575	TLS	Timor-Leste	ldc	1.5	50%	1850	0.5	Historical fossil fuel sales (not considering colonies)	387.366	210.33	177.036
576	TON	Tonga	developing	1.5	50%	1850	0.5	Historical fossil fuel sales (not considering colonies)	423.502	225.372	198.13
577	TTO	Trinidad and Tobago	developing	1.5	50%	1850	0.5	Historical fossil fuel sales (not considering colonies)	197.251	-3006.07	3203.32
578	TUN	Tunisia	developing	1.5	50%	1850	0.5	Historical fossil fuel sales (not considering colonies)	414.12	205.429	208.691
579	TUR	Türkiye	developing	1.5	50%	1850	0.5	Historical fossil fuel sales (not considering colonies)	421.713	166.117	255.596
580	TUV	Tuvalu	ldc	1.5	50%	1850	0.5	Historical fossil fuel sales (not considering colonies)	423.502	265.665	157.837
581	TZA	Tanzania	ldc	1.5	50%	1850	0.5	Historical fossil fuel sales (not considering colonies)	423.482	365.339	58.1426
582	UGA	Uganda	ldc	1.5	50%	1850	0.5	Historical fossil fuel sales (not considering colonies)	423.502	378.098	45.4045
583	UKR	Ukraine	developed	1.5	50%	1850	0.5	Historical fossil fuel sales (not considering colonies)	409.865	-1659.04	2068.91
584	URY	Uruguay	developing	1.5	50%	1850	0.5	Historical fossil fuel sales (not considering colonies)	423.502	-897.314	1320.82
585	USA	United States	developed	1.5	50%	1850	0.5	Historical fossil fuel sales (not considering colonies)	352.368	-1731.16	2083.52
586	UZB	Uzbekistan	developing	1.5	50%	1850	0.5	Historical fossil fuel sales (not considering colonies)	411.434	-22.4874	433.921
587	VCT	St. Vincent and the Grenadines	developing	1.5	50%	1850	0.5	Historical fossil fuel sales (not considering colonies)	423.502	141.557	281.945
588	VEN	Venezuela	developing	1.5	50%	1850	0.5	Historical fossil fuel sales (not considering colonies)	295.111	-234.492	529.603
589	VGB	British Virgin Islands	developing	1.5	50%	1850	0.5	Historical fossil fuel sales (not considering colonies)	423.502	144.247	279.255
590	VNM	Vietnam	developing	1.5	50%	1850	0.5	Historical fossil fuel sales (not considering colonies)	419.988	261.222	158.765
591	VUT	Vanuatu	developing	1.5	50%	1850	0.5	Historical fossil fuel sales (not considering colonies)	423.502	274.047	149.455
592	WSM	Samoa	developing	1.5	50%	1850	0.5	Historical fossil fuel sales (not considering colonies)	423.502	280.357	143.146
593	YEM	Yemen	ldc	1.5	50%	1850	0.5	Historical fossil fuel sales (not considering colonies)	419.387	365.265	54.1216
594	ZAF	South Africa	developing	1.5	50%	1850	0.5	Historical fossil fuel sales (not considering colonies)	412.668	-101.199	513.867
595	ZMB	Zambia	ldc	1.5	50%	1850	0.5	Historical fossil fuel sales (not considering colonies)	423.457	309.573	113.884
596	ZWE	Zimbabwe	developing	1.5	50%	1850	0.5	Historical fossil fuel sales (not considering colonies)	422.675	290.135	132.541
597	ABW	Aruba	developing	1.5	50%	1850	0.5	Historical fossil fuel sales (considering colonies)	424.899	-3849.7	4274.6
598	AFG	Afghanistan	ldc	1.5	50%	1850	0.5	Historical fossil fuel sales (considering colonies)	424.673	386.117	38.5556
599	AGO	Angola	ldc	1.5	50%	1850	0.5	Historical fossil fuel sales (considering colonies)	404.675	281.886	122.789
600	AIA	Anguilla	developing	1.5	50%	1850	0.5	Historical fossil fuel sales (considering colonies)	424.899	-54.4215	479.32
601	ALB	Albania	developed	1.5	50%	1850	0.5	Historical fossil fuel sales (considering colonies)	404.924	100.451	304.473
602	AND	Andorra	developed	1.5	50%	1850	0.5	Historical fossil fuel sales (considering colonies)	424.899	-82.611	507.51
603	ARE	United Arab Emirates	developing	1.5	50%	1850	0.5	Historical fossil fuel sales (considering colonies)	197.211	-734.566	931.777
604	ARG	Argentina	developing	1.5	50%	1850	0.5	Historical fossil fuel sales (considering colonies)	398.365	-148.581	546.946
605	ARM	Armenia	developing	1.5	50%	1850	0.5	Historical fossil fuel sales (considering colonies)	424.899	-148.236	573.135
606	ATG	Antigua and Barbuda	developing	1.5	50%	1850	0.5	Historical fossil fuel sales (considering colonies)	424.899	-76.1702	501.069
607	AUS	Australia	developed	1.5	50%	1850	0.5	Historical fossil fuel sales (considering colonies)	350.874	-970.696	1321.57
608	AUT	Austria	developed	1.5	50%	1850	0.5	Historical fossil fuel sales (considering colonies)	412.786	-648.881	1061.67
609	AZE	Azerbaijan	developing	1.5	50%	1850	0.5	Historical fossil fuel sales (considering colonies)	350.262	-328.737	678.999
610	BDI	Burundi	ldc	1.5	50%	1850	0.5	Historical fossil fuel sales (considering colonies)	424.899	404.761	20.1378
611	BEL	Belgium	developed	1.5	50%	1850	0.5	Historical fossil fuel sales (considering colonies)	415.613	-1198.78	1614.39
612	BEN	Benin	ldc	1.5	50%	1850	0.5	Historical fossil fuel sales (considering colonies)	424.819	380.099	44.7201
613	BFA	Burkina Faso	ldc	1.5	50%	1850	0.5	Historical fossil fuel sales (considering colonies)	424.899	377.05	47.849
614	BGD	Bangladesh	ldc	1.5	50%	1850	0.5	Historical fossil fuel sales (considering colonies)	424.221	379.053	45.1684
615	BGR	Bulgaria	developed	1.5	50%	1850	0.5	Historical fossil fuel sales (considering colonies)	411.635	-1030.46	1442.1
616	BHR	Bahrain	developing	1.5	50%	1850	0.5	Historical fossil fuel sales (considering colonies)	322.585	-1842.52	2165.1
617	BHS	Bahamas	developing	1.5	50%	1850	0.5	Historical fossil fuel sales (considering colonies)	424.899	-262.185	687.084
618	BIH	Bosnia and Herzegovina	developed	1.5	50%	1850	0.5	Historical fossil fuel sales (considering colonies)	422.522	-580.311	1002.83
619	BLR	Belarus	developed	1.5	50%	1850	0.5	Historical fossil fuel sales (considering colonies)	421.282	-828.926	1250.21
620	BLZ	Belize	developing	1.5	50%	1850	0.5	Historical fossil fuel sales (considering colonies)	421.614	147.283	274.331
621	BOL	Bolivia	developing	1.5	50%	1850	0.5	Historical fossil fuel sales (considering colonies)	415.277	234.306	180.97
622	BRA	Brazil	developing	1.5	50%	1850	0.5	Historical fossil fuel sales (considering colonies)	414.754	40.2034	374.55
623	BRB	Barbados	developing	1.5	50%	1850	0.5	Historical fossil fuel sales (considering colonies)	418.307	-1363.02	1781.33
624	BRN	Brunei Darussalam	developing	1.5	50%	1850	0.5	Historical fossil fuel sales (considering colonies)	197.211	-2075.21	2272.43
625	BTN	Bhutan	ldc	1.5	50%	1850	0.5	Historical fossil fuel sales (considering colonies)	424.778	92.78	331.998
626	BWA	Botswana	developing	1.5	50%	1850	0.5	Historical fossil fuel sales (considering colonies)	424.176	-24.9473	449.123
627	CAF	Central African Republic	ldc	1.5	50%	1850	0.5	Historical fossil fuel sales (considering colonies)	424.899	175.215	249.683
628	CAN	Canada	developed	1.5	50%	1850	0.5	Historical fossil fuel sales (considering colonies)	281.067	-1109.53	1390.59
629	CHE	Switzerland	developed	1.5	50%	1850	0.5	Historical fossil fuel sales (considering colonies)	424.896	-183.246	608.142
630	CHL	Chile	developing	1.5	50%	1850	0.5	Historical fossil fuel sales (considering colonies)	421.436	105.109	316.327
631	CHN	China	developing	1.5	50%	1850	0.5	Historical fossil fuel sales (considering colonies)	415.736	-1.08322	416.819
632	CIV	Cote d'Ivoire	developing	1.5	50%	1850	0.5	Historical fossil fuel sales (considering colonies)	423.983	376.917	47.0658
633	CMR	Cameroon	developing	1.5	50%	1850	0.5	Historical fossil fuel sales (considering colonies)	422.406	350.698	71.7074
634	COD	DR Congo	ldc	1.5	50%	1850	0.5	Historical fossil fuel sales (considering colonies)	424.744	390.586	34.1587
635	COG	Congo Republic	developing	1.5	50%	1850	0.5	Historical fossil fuel sales (considering colonies)	395.148	184.012	211.136
636	COK	Cook Islands	developing	1.5	50%	1850	0.5	Historical fossil fuel sales (considering colonies)	424.899	56.2104	368.688
637	COL	Colombia	developing	1.5	50%	1850	0.5	Historical fossil fuel sales (considering colonies)	403.97	194.946	209.023
638	COM	Comoros	ldc	1.5	50%	1850	0.5	Historical fossil fuel sales (considering colonies)	424.899	353.081	71.8179
639	CPV	Cabo Verde	developing	1.5	50%	1850	0.5	Historical fossil fuel sales (considering colonies)	424.899	350.193	74.7056
640	CRI	Costa Rica	developing	1.5	50%	1850	0.5	Historical fossil fuel sales (considering colonies)	424.899	214.29	210.609
641	CUB	Cuba	developing	1.5	50%	1850	0.5	Historical fossil fuel sales (considering colonies)	419.166	-47.0911	466.257
642	CYP	Cyprus	developed	1.5	50%	1850	0.5	Historical fossil fuel sales (considering colonies)	424.899	-33.1784	458.077
643	CZE	Czech Republic	developed	1.5	50%	1850	0.5	Historical fossil fuel sales (considering colonies)	409.316	-1276.16	1685.48
644	DEU	Germany	developed	1.5	50%	1850	0.5	Historical fossil fuel sales (considering colonies)	402.258	-1486.92	1889.17
645	DJI	Djibouti	ldc	1.5	50%	1850	0.5	Historical fossil fuel sales (considering colonies)	424.899	295.254	129.645
646	DMA	Dominica	developing	1.5	50%	1850	0.5	Historical fossil fuel sales (considering colonies)	424.899	162.641	262.258
647	DNK	Denmark	developed	1.5	50%	1850	0.5	Historical fossil fuel sales (considering colonies)	378.029	-847.402	1225.43
648	DOM	Dominican Republic	developing	1.5	50%	1850	0.5	Historical fossil fuel sales (considering colonies)	424.899	239.578	185.321
649	DZA	Algeria	developing	1.5	50%	1850	0.5	Historical fossil fuel sales (considering colonies)	377.442	126.447	250.995
650	ECU	Ecuador	developing	1.5	50%	1850	0.5	Historical fossil fuel sales (considering colonies)	395.557	168.199	227.358
651	EGY	Egypt	developing	1.5	50%	1850	0.5	Historical fossil fuel sales (considering colonies)	416.015	313.463	102.552
652	ERI	Eritrea	ldc	1.5	50%	1850	0.5	Historical fossil fuel sales (considering colonies)	424.899	300.956	123.943
653	ESP	Spain	developed	1.5	50%	1850	0.5	Historical fossil fuel sales (considering colonies)	421.999	-226.807	648.806
654	EST	Estonia	developed	1.5	50%	1850	0.5	Historical fossil fuel sales (considering colonies)	424.899	-2331.3	2756.2
655	ETH	Ethiopia	ldc	1.5	50%	1850	0.5	Historical fossil fuel sales (considering colonies)	424.899	377.529	47.3696
656	FIN	Finland	developed	1.5	50%	1850	0.5	Historical fossil fuel sales (considering colonies)	424.899	-773.743	1198.64
657	FJI	Fiji	developing	1.5	50%	1850	0.5	Historical fossil fuel sales (considering colonies)	424.899	174.148	250.75
658	FRA	France	developed	1.5	50%	1850	0.5	Historical fossil fuel sales (considering colonies)	419.459	-625.433	1044.89
659	FSM	Micronesia, Fed. Sts.	developing	1.5	50%	1850	0.5	Historical fossil fuel sales (considering colonies)	424.899	314.978	109.921
660	GAB	Gabon	developing	1.5	50%	1850	0.5	Historical fossil fuel sales (considering colonies)	330.318	-224.158	554.476
661	GBR	United Kingdom	developed	1.5	50%	1850	0.5	Historical fossil fuel sales (considering colonies)	358.992	-1374.59	1733.58
662	GEO	Georgia	developing	1.5	50%	1850	0.5	Historical fossil fuel sales (considering colonies)	424.468	-624.409	1048.88
663	GHA	Ghana	developing	1.5	50%	1850	0.5	Historical fossil fuel sales (considering colonies)	424.247	375.267	48.9796
664	GIN	Guinea	ldc	1.5	50%	1850	0.5	Historical fossil fuel sales (considering colonies)	424.899	325.176	99.7229
665	GMB	Gambia	ldc	1.5	50%	1850	0.5	Historical fossil fuel sales (considering colonies)	424.899	373.048	51.8508
666	GNB	Guinea-Bissau	ldc	1.5	50%	1850	0.5	Historical fossil fuel sales (considering colonies)	424.899	325.547	99.3519
667	GNQ	Equatorial Guinea	developing	1.5	50%	1850	0.5	Historical fossil fuel sales (considering colonies)	336.71	-109.728	446.438
668	GRC	Greece	developed	1.5	50%	1850	0.5	Historical fossil fuel sales (considering colonies)	418.992	-487.616	906.608
669	GRD	Grenada	developing	1.5	50%	1850	0.5	Historical fossil fuel sales (considering colonies)	424.899	248.906	175.993
670	GTM	Guatemala	developing	1.5	50%	1850	0.5	Historical fossil fuel sales (considering colonies)	424.317	324.112	100.205
671	GUY	Guyana	developing	1.5	50%	1850	0.5	Historical fossil fuel sales (considering colonies)	424.899	-116.495	541.394
672	HND	Honduras	developing	1.5	50%	1850	0.5	Historical fossil fuel sales (considering colonies)	424.899	337.821	87.0776
673	HRV	Croatia	developed	1.5	50%	1850	0.5	Historical fossil fuel sales (considering colonies)	415.092	-382.205	797.297
674	HTI	Haiti	ldc	1.5	50%	1850	0.5	Historical fossil fuel sales (considering colonies)	424.899	341.505	83.3943
675	HUN	Hungary	developed	1.5	50%	1850	0.5	Historical fossil fuel sales (considering colonies)	404.182	-600.456	1004.64
676	IDN	Indonesia	developing	1.5	50%	1850	0.5	Historical fossil fuel sales (considering colonies)	414.536	257.863	156.673
677	IND	India	developing	1.5	50%	1850	0.5	Historical fossil fuel sales (considering colonies)	423.489	328.764	94.7255
678	IRL	Ireland	developed	1.5	50%	1850	0.5	Historical fossil fuel sales (considering colonies)	422.076	-702.898	1124.97
679	IRN	Iran	developing	1.5	50%	1850	0.5	Historical fossil fuel sales (considering colonies)	354.61	-123.922	478.531
680	IRQ	Iraq	developing	1.5	50%	1850	0.5	Historical fossil fuel sales (considering colonies)	371.543	145.373	226.17
681	ISL	Iceland	developed	1.5	50%	1850	0.5	Historical fossil fuel sales (considering colonies)	424.899	-727.359	1152.26
682	ISR	Israel	developed	1.5	50%	1850	0.5	Historical fossil fuel sales (considering colonies)	423.587	16.7945	406.793
683	ITA	Italy	developed	1.5	50%	1850	0.5	Historical fossil fuel sales (considering colonies)	418.885	-447.911	866.796
684	JAM	Jamaica	developing	1.5	50%	1850	0.5	Historical fossil fuel sales (considering colonies)	424.899	-191.454	616.352
685	JOR	Jordan	developing	1.5	50%	1850	0.5	Historical fossil fuel sales (considering colonies)	424.757	300.266	124.49
686	JPN	Japan	developed	1.5	50%	1850	0.5	Historical fossil fuel sales (considering colonies)	422.332	-563.749	986.081
687	KAZ	Kazakhstan	developing	1.5	50%	1850	0.5	Historical fossil fuel sales (considering colonies)	355.903	-880.903	1236.81
688	KEN	Kenya	developing	1.5	50%	1850	0.5	Historical fossil fuel sales (considering colonies)	424.899	351.948	72.9507
689	KGZ	Kyrgyz Republic	developing	1.5	50%	1850	0.5	Historical fossil fuel sales (considering colonies)	424.641	154.889	269.752
690	KHM	Cambodia	ldc	1.5	50%	1850	0.5	Historical fossil fuel sales (considering colonies)	424.899	263.998	160.901
691	KIR	Kiribati	ldc	1.5	50%	1850	0.5	Historical fossil fuel sales (considering colonies)	424.899	391.898	33.0009
692	KNA	St. Kitts and Nevis	developing	1.5	50%	1850	0.5	Historical fossil fuel sales (considering colonies)	424.899	-166.51	591.409
693	KOR	South Korea	developed	1.5	50%	1850	0.5	Historical fossil fuel sales (considering colonies)	423.742	-268.302	692.044
694	KWT	Kuwait	developing	1.5	50%	1850	0.5	Historical fossil fuel sales (considering colonies)	197.211	-1479.47	1676.68
695	LAO	Laos	ldc	1.5	50%	1850	0.5	Historical fossil fuel sales (considering colonies)	424.8	277.042	147.758
696	LBN	Lebanon	developing	1.5	50%	1850	0.5	Historical fossil fuel sales (considering colonies)	424.899	34.1112	390.788
697	LBR	Liberia	ldc	1.5	50%	1850	0.5	Historical fossil fuel sales (considering colonies)	424.899	382.594	42.3043
698	LBY	Libya	developing	1.5	50%	1850	0.5	Historical fossil fuel sales (considering colonies)	197.211	-607.229	804.44
699	LCA	St. Lucia	developing	1.5	50%	1850	0.5	Historical fossil fuel sales (considering colonies)	424.899	184.557	240.342
700	LIE	Liechtenstein	developed	1.5	50%	1850	0.5	Historical fossil fuel sales (considering colonies)	424.899	-256.97	681.869
701	LKA	Sri Lanka	developing	1.5	50%	1850	0.5	Historical fossil fuel sales (considering colonies)	424.899	303.088	121.811
702	LSO	Lesotho	ldc	1.5	50%	1850	0.5	Historical fossil fuel sales (considering colonies)	424.899	266.927	157.972
703	LTU	Lithuania	developed	1.5	50%	1850	0.5	Historical fossil fuel sales (considering colonies)	423.623	-1293.68	1717.3
704	LUX	Luxembourg	developed	1.5	50%	1850	0.5	Historical fossil fuel sales (considering colonies)	424.899	-1436.93	1861.83
705	LVA	Latvia	developed	1.5	50%	1850	0.5	Historical fossil fuel sales (considering colonies)	424.899	-1032.34	1457.24
706	MAR	Morocco	developing	1.5	50%	1850	0.5	Historical fossil fuel sales (considering colonies)	424.83	311.016	113.815
707	MCO	Monaco	developed	1.5	50%	1850	0.5	Historical fossil fuel sales (considering colonies)	424.899	2.75758	422.141
708	MDA	Moldova	developed	1.5	50%	1850	0.5	Historical fossil fuel sales (considering colonies)	424.877	-595.28	1020.16
709	MDG	Madagascar	ldc	1.5	50%	1850	0.5	Historical fossil fuel sales (considering colonies)	424.899	349.695	75.2042
710	MDV	Maldives	developing	1.5	50%	1850	0.5	Historical fossil fuel sales (considering colonies)	424.899	342.976	81.9229
711	MEX	Mexico	developing	1.5	50%	1850	0.5	Historical fossil fuel sales (considering colonies)	391.667	56.9333	334.734
712	MHL	Marshall Islands	developing	1.5	50%	1850	0.5	Historical fossil fuel sales (considering colonies)	424.899	163.416	261.483
713	MKD	North Macedonia	developed	1.5	50%	1850	0.5	Historical fossil fuel sales (considering colonies)	423.105	-330.403	753.508
714	MLI	Mali	ldc	1.5	50%	1850	0.5	Historical fossil fuel sales (considering colonies)	424.899	348.241	76.6577
715	MLT	Malta	developed	1.5	50%	1850	0.5	Historical fossil fuel sales (considering colonies)	424.899	34.2287	390.67
716	MMR	Myanmar	ldc	1.5	50%	1850	0.5	Historical fossil fuel sales (considering colonies)	422.873	329.885	92.9881
717	MNE	Montenegro	developed	1.5	50%	1850	0.5	Historical fossil fuel sales (considering colonies)	423.797	-212.116	635.912
718	MNG	Mongolia	developing	1.5	50%	1850	0.5	Historical fossil fuel sales (considering colonies)	413.811	-317.652	731.463
719	MOZ	Mozambique	ldc	1.5	50%	1850	0.5	Historical fossil fuel sales (considering colonies)	424.578	361.34	63.2375
720	MRT	Mauritania	ldc	1.5	50%	1850	0.5	Historical fossil fuel sales (considering colonies)	424.223	315.549	108.674
721	MUS	Mauritius	developing	1.5	50%	1850	0.5	Historical fossil fuel sales (considering colonies)	424.899	52.9196	371.979
722	MWI	Malawi	ldc	1.5	50%	1850	0.5	Historical fossil fuel sales (considering colonies)	424.895	397.328	27.5672
723	MYS	Malaysia	developing	1.5	50%	1850	0.5	Historical fossil fuel sales (considering colonies)	392.461	35.2668	357.194
724	NAM	Namibia	developing	1.5	50%	1850	0.5	Historical fossil fuel sales (considering colonies)	424.899	10.051	414.848
725	NER	Niger	ldc	1.5	50%	1850	0.5	Historical fossil fuel sales (considering colonies)	424.813	392.233	32.5799
726	NGA	Nigeria	developing	1.5	50%	1850	0.5	Historical fossil fuel sales (considering colonies)	416.046	320.342	95.7035
727	NIC	Nicaragua	developing	1.5	50%	1850	0.5	Historical fossil fuel sales (considering colonies)	424.899	244.054	180.845
728	NIU	Niue	developing	1.5	50%	1850	0.5	Historical fossil fuel sales (considering colonies)	424.899	51.8339	373.065
729	NLD	Netherlands	developed	1.5	50%	1850	0.5	Historical fossil fuel sales (considering colonies)	367.328	-1042.34	1409.67
730	NOR	Norway	developed	1.5	50%	1850	0.5	Historical fossil fuel sales (considering colonies)	197.211	-859.908	1057.12
731	NPL	Nepal	ldc	1.5	50%	1850	0.5	Historical fossil fuel sales (considering colonies)	424.898	311.98	112.919
732	NRU	Nauru	developing	1.5	50%	1850	0.5	Historical fossil fuel sales (considering colonies)	424.899	178.795	246.104
733	NZL	New Zealand	developed	1.5	50%	1850	0.5	Historical fossil fuel sales (considering colonies)	404.501	-892.464	1296.96
734	OMN	Oman	developing	1.5	50%	1850	0.5	Historical fossil fuel sales (considering colonies)	228.251	-597.654	825.905
735	PAK	Pakistan	developing	1.5	50%	1850	0.5	Historical fossil fuel sales (considering colonies)	423.939	339.889	84.0497
736	PAN	Panama	developing	1.5	50%	1850	0.5	Historical fossil fuel sales (considering colonies)	424.899	219.579	205.32
737	PER	Peru	developing	1.5	50%	1850	0.5	Historical fossil fuel sales (considering colonies)	418.311	231.692	186.619
738	PHL	Philippines	developing	1.5	50%	1850	0.5	Historical fossil fuel sales (considering colonies)	424.591	337.114	87.4769
739	PLW	Palau	developing	1.5	50%	1850	0.5	Historical fossil fuel sales (considering colonies)	424.899	-2620.6	3045.5
740	PNG	Papua New Guinea	developing	1.5	50%	1850	0.5	Historical fossil fuel sales (considering colonies)	421.848	331.987	89.861
741	POL	Poland	developed	1.5	50%	1850	0.5	Historical fossil fuel sales (considering colonies)	396.42	-989.478	1385.9
742	PRK	North Korea	developing	1.5	50%	1850	0.5	Historical fossil fuel sales (considering colonies)	419.019	-44.9575	463.977
743	PRT	Portugal	developed	1.5	50%	1850	0.5	Historical fossil fuel sales (considering colonies)	423.495	-232.226	655.722
744	PRY	Paraguay	developing	1.5	50%	1850	0.5	Historical fossil fuel sales (considering colonies)	424.899	-53.9932	478.892
745	QAT	Qatar	developing	1.5	50%	1850	0.5	Historical fossil fuel sales (considering colonies)	197.211	-2494.86	2692.07
746	ROU	Romania	developed	1.5	50%	1850	0.5	Historical fossil fuel sales (considering colonies)	386.67	-585.475	972.146
747	RUS	Russia	developed	1.5	50%	1850	0.5	Historical fossil fuel sales (considering colonies)	293.518	-1469.37	1762.89
748	RWA	Rwanda	ldc	1.5	50%	1850	0.5	Historical fossil fuel sales (considering colonies)	424.899	395.477	29.4219
749	SAU	Saudi Arabia	developing	1.5	50%	1850	0.5	Historical fossil fuel sales (considering colonies)	197.211	-443.266	640.477
750	SDN	Sudan	ldc	1.5	50%	1850	0.5	Historical fossil fuel sales (considering colonies)	422.571	314.463	108.109
751	SEN	Senegal	ldc	1.5	50%	1850	0.5	Historical fossil fuel sales (considering colonies)	424.888	355.163	69.7248
752	SGP	Singapore	developing	1.5	50%	1850	0.5	Historical fossil fuel sales (considering colonies)	424.899	-1.02398	425.923
753	SLB	Solomon Islands	ldc	1.5	50%	1850	0.5	Historical fossil fuel sales (considering colonies)	424.899	387.995	36.904
754	SLE	Sierra Leone	ldc	1.5	50%	1850	0.5	Historical fossil fuel sales (considering colonies)	424.899	372.63	52.2685
755	SLV	El Salvador	developing	1.5	50%	1850	0.5	Historical fossil fuel sales (considering colonies)	424.899	258.839	166.06
756	SMR	San Marino	developed	1.5	50%	1850	0.5	Historical fossil fuel sales (considering colonies)	424.899	-231.927	656.826
757	SOM	Somalia	ldc	1.5	50%	1850	0.5	Historical fossil fuel sales (considering colonies)	424.899	317.427	107.471
758	SRB	Serbia	developed	1.5	50%	1850	0.5	Historical fossil fuel sales (considering colonies)	416.625	-669.18	1085.8
759	SSD	South Sudan	ldc	1.5	50%	1850	0.5	Historical fossil fuel sales (considering colonies)	422.186	75.6873	346.499
760	STP	Sao Tome and Principe	ldc	1.5	50%	1850	0.5	Historical fossil fuel sales (considering colonies)	424.899	383.224	41.6745
761	SUR	Suriname	developing	1.5	50%	1850	0.5	Historical fossil fuel sales (considering colonies)	407.449	-77.2794	484.728
762	SVK	Slovakia	developed	1.5	50%	1850	0.5	Historical fossil fuel sales (considering colonies)	424.106	-863.609	1287.71
763	SVN	Slovenia	developed	1.5	50%	1850	0.5	Historical fossil fuel sales (considering colonies)	422.885	-497.234	920.12
764	SWE	Sweden	developed	1.5	50%	1850	0.5	Historical fossil fuel sales (considering colonies)	424.751	-390.755	815.505
765	SWZ	Eswatini	developing	1.5	50%	1850	0.5	Historical fossil fuel sales (considering colonies)	424.412	234.511	189.901
766	SYC	Seychelles	developing	1.5	50%	1850	0.5	Historical fossil fuel sales (considering colonies)	424.899	126.306	298.593
767	SYR	Syria	developing	1.5	50%	1850	0.5	Historical fossil fuel sales (considering colonies)	413.169	269.535	143.634
768	TCA	Turks and Caicos Islands	developing	1.5	50%	1850	0.5	Historical fossil fuel sales (considering colonies)	424.899	267.125	157.774
769	TCD	Chad	ldc	1.5	50%	1850	0.5	Historical fossil fuel sales (considering colonies)	422.271	346.551	75.7196
770	TGO	Togo	ldc	1.5	50%	1850	0.5	Historical fossil fuel sales (considering colonies)	424.899	353.773	71.1256
771	THA	Thailand	developing	1.5	50%	1850	0.5	Historical fossil fuel sales (considering colonies)	417.352	55.7645	361.587
772	TJK	Tajikistan	developing	1.5	50%	1850	0.5	Historical fossil fuel sales (considering colonies)	424.828	293.771	131.057
773	TKM	Turkmenistan	developing	1.5	50%	1850	0.5	Historical fossil fuel sales (considering colonies)	330.33	-498.98	829.31
774	TLS	Timor-Leste	ldc	1.5	50%	1850	0.5	Historical fossil fuel sales (considering colonies)	384.865	207.829	177.036
775	TON	Tonga	developing	1.5	50%	1850	0.5	Historical fossil fuel sales (considering colonies)	424.899	226.769	198.13
776	TTO	Trinidad and Tobago	developing	1.5	50%	1850	0.5	Historical fossil fuel sales (considering colonies)	197.211	-3006.11	3203.32
777	TUN	Tunisia	developing	1.5	50%	1850	0.5	Historical fossil fuel sales (considering colonies)	414.507	205.815	208.691
778	TUR	Türkiye	developing	1.5	50%	1850	0.5	Historical fossil fuel sales (considering colonies)	422.917	167.32	255.596
779	TUV	Tuvalu	ldc	1.5	50%	1850	0.5	Historical fossil fuel sales (considering colonies)	424.899	267.062	157.837
780	TZA	Tanzania	ldc	1.5	50%	1850	0.5	Historical fossil fuel sales (considering colonies)	424.876	366.733	58.1426
781	UGA	Uganda	ldc	1.5	50%	1850	0.5	Historical fossil fuel sales (considering colonies)	424.899	379.494	45.4045
782	UKR	Ukraine	developed	1.5	50%	1850	0.5	Historical fossil fuel sales (considering colonies)	409.79	-1659.12	2068.91
783	URY	Uruguay	developing	1.5	50%	1850	0.5	Historical fossil fuel sales (considering colonies)	424.899	-895.918	1320.82
784	USA	United States	developed	1.5	50%	1850	0.5	Historical fossil fuel sales (considering colonies)	346.093	-1737.43	2083.52
785	UZB	Uzbekistan	developing	1.5	50%	1850	0.5	Historical fossil fuel sales (considering colonies)	411.529	-22.3924	433.921
786	VCT	St. Vincent and the Grenadines	developing	1.5	50%	1850	0.5	Historical fossil fuel sales (considering colonies)	424.899	142.954	281.945
787	VEN	Venezuela	developing	1.5	50%	1850	0.5	Historical fossil fuel sales (considering colonies)	282.661	-246.942	529.603
788	VGB	British Virgin Islands	developing	1.5	50%	1850	0.5	Historical fossil fuel sales (considering colonies)	424.899	145.644	279.255
789	VNM	Vietnam	developing	1.5	50%	1850	0.5	Historical fossil fuel sales (considering colonies)	421.034	262.268	158.765
790	VUT	Vanuatu	developing	1.5	50%	1850	0.5	Historical fossil fuel sales (considering colonies)	424.899	275.443	149.455
791	WSM	Samoa	developing	1.5	50%	1850	0.5	Historical fossil fuel sales (considering colonies)	424.899	281.753	143.146
792	YEM	Yemen	ldc	1.5	50%	1850	0.5	Historical fossil fuel sales (considering colonies)	420.34	366.218	54.1216
793	ZAF	South Africa	developing	1.5	50%	1850	0.5	Historical fossil fuel sales (considering colonies)	412.934	-100.933	513.867
794	ZMB	Zambia	ldc	1.5	50%	1850	0.5	Historical fossil fuel sales (considering colonies)	424.849	310.964	113.884
795	ZWE	Zimbabwe	developing	1.5	50%	1850	0.5	Historical fossil fuel sales (considering colonies)	424.307	291.767	132.541
796	ABW	Aruba	developing	1.5	50%	1850	0.5	GDP per capita (MER)	292.451	-3982.15	4274.6
797	AFG	Afghanistan	ldc	1.5	50%	1850	0.5	GDP per capita (MER)	448.76	410.204	38.5556
798	AGO	Angola	ldc	1.5	50%	1850	0.5	GDP per capita (MER)	444.778	321.989	122.789
799	AIA	Anguilla	developing	1.5	50%	1850	0.5	GDP per capita (MER)	412.263	-67.0571	479.32
800	ALB	Albania	developed	1.5	50%	1850	0.5	GDP per capita (MER)	424.409	119.936	304.473
801	AND	Andorra	developed	1.5	50%	1850	0.5	GDP per capita (MER)	283.602	-223.907	507.51
802	ARE	United Arab Emirates	developing	1.5	50%	1850	0.5	GDP per capita (MER)	289.92	-641.857	931.777
803	ARG	Argentina	developing	1.5	50%	1850	0.5	GDP per capita (MER)	399.238	-147.707	546.946
804	ARM	Armenia	developing	1.5	50%	1850	0.5	GDP per capita (MER)	427.279	-145.855	573.135
805	ATG	Antigua and Barbuda	developing	1.5	50%	1850	0.5	GDP per capita (MER)	386.258	-114.811	501.069
806	AUS	Australia	developed	1.5	50%	1850	0.5	GDP per capita (MER)	232.204	-1089.37	1321.57
807	AUT	Austria	developed	1.5	50%	1850	0.5	GDP per capita (MER)	241.176	-820.491	1061.67
808	AZE	Azerbaijan	developing	1.5	50%	1850	0.5	GDP per capita (MER)	426.907	-252.092	678.999
809	BDI	Burundi	ldc	1.5	50%	1850	0.5	GDP per capita (MER)	449.198	429.06	20.1378
810	BEL	Belgium	developed	1.5	50%	1850	0.5	GDP per capita (MER)	260.769	-1353.62	1614.39
811	BEN	Benin	ldc	1.5	50%	1850	0.5	GDP per capita (MER)	446.949	402.229	44.7201
812	BFA	Burkina Faso	ldc	1.5	50%	1850	0.5	GDP per capita (MER)	447.967	400.118	47.849
813	BGD	Bangladesh	ldc	1.5	50%	1850	0.5	GDP per capita (MER)	443.39	398.222	45.1684
814	BGR	Bulgaria	developed	1.5	50%	1850	0.5	GDP per capita (MER)	397.21	-1044.89	1442.1
815	BHR	Bahrain	developing	1.5	50%	1850	0.5	GDP per capita (MER)	363.457	-1801.64	2165.1
816	BHS	Bahamas	developing	1.5	50%	1850	0.5	GDP per capita (MER)	338.721	-348.363	687.084
817	BIH	Bosnia and Herzegovina	developed	1.5	50%	1850	0.5	GDP per capita (MER)	417.645	-585.188	1002.83
818	BLR	Belarus	developed	1.5	50%	1850	0.5	GDP per capita (MER)	417.058	-833.15	1250.21
819	BLZ	Belize	developing	1.5	50%	1850	0.5	GDP per capita (MER)	430.258	155.927	274.331
820	BOL	Bolivia	developing	1.5	50%	1850	0.5	GDP per capita (MER)	439.587	258.616	180.97
821	BRA	Brazil	developing	1.5	50%	1850	0.5	GDP per capita (MER)	413.395	38.845	374.55
822	BRB	Barbados	developing	1.5	50%	1850	0.5	GDP per capita (MER)	378.391	-1402.94	1781.33
823	BRN	Brunei Darussalam	developing	1.5	50%	1850	0.5	GDP per capita (MER)	327.949	-1944.48	2272.43
824	BTN	Bhutan	ldc	1.5	50%	1850	0.5	GDP per capita (MER)	437.653	105.655	331.998
825	BWA	Botswana	developing	1.5	50%	1850	0.5	GDP per capita (MER)	429.236	-19.8873	449.123
826	CAF	Central African Republic	ldc	1.5	50%	1850	0.5	GDP per capita (MER)	449.014	199.33	249.683
827	CAN	Canada	developed	1.5	50%	1850	0.5	GDP per capita (MER)	281.534	-1109.06	1390.59
828	CHE	Switzerland	developed	1.5	50%	1850	0.5	GDP per capita (MER)	194.351	-413.791	608.142
829	CHL	Chile	developing	1.5	50%	1850	0.5	GDP per capita (MER)	388.655	72.328	316.327
830	CHN	China	developing	1.5	50%	1850	0.5	GDP per capita (MER)	394.519	-22.3001	416.819
831	CIV	Cote d'Ivoire	developing	1.5	50%	1850	0.5	GDP per capita (MER)	443.973	396.907	47.0658
832	CMR	Cameroon	developing	1.5	50%	1850	0.5	GDP per capita (MER)	446.327	374.62	71.7074
833	COD	DR Congo	ldc	1.5	50%	1850	0.5	GDP per capita (MER)	448.804	414.645	34.1587
834	COG	Congo Republic	developing	1.5	50%	1850	0.5	GDP per capita (MER)	445.903	234.766	211.136
835	COK	Cook Islands	developing	1.5	50%	1850	0.5	GDP per capita (MER)	412.263	43.5747	368.688
836	COL	Colombia	developing	1.5	50%	1850	0.5	GDP per capita (MER)	423.155	214.132	209.023
837	COM	Comoros	ldc	1.5	50%	1850	0.5	GDP per capita (MER)	445.712	373.895	71.8179
838	CPV	Cabo Verde	developing	1.5	50%	1850	0.5	GDP per capita (MER)	438.793	364.087	74.7056
839	CRI	Costa Rica	developing	1.5	50%	1850	0.5	GDP per capita (MER)	396.261	185.652	210.609
840	CUB	Cuba	developing	1.5	50%	1850	0.5	GDP per capita (MER)	412.207	-54.05	466.257
841	CYP	Cyprus	developed	1.5	50%	1850	0.5	GDP per capita (MER)	365.595	-92.4819	458.077
842	CZE	Czech Republic	developed	1.5	50%	1850	0.5	GDP per capita (MER)	358.141	-1327.34	1685.48
843	DEU	Germany	developed	1.5	50%	1850	0.5	GDP per capita (MER)	242.85	-1646.32	1889.17
844	DJI	Djibouti	ldc	1.5	50%	1850	0.5	GDP per capita (MER)	439.994	310.348	129.645
845	DMA	Dominica	developing	1.5	50%	1850	0.5	GDP per capita (MER)	418.568	156.311	262.258
846	DNK	Denmark	developed	1.5	50%	1850	0.5	GDP per capita (MER)	210.311	-1015.12	1225.43
847	DOM	Dominican Republic	developing	1.5	50%	1850	0.5	GDP per capita (MER)	417.215	231.894	185.321
848	DZA	Algeria	developing	1.5	50%	1850	0.5	GDP per capita (MER)	436.477	185.482	250.995
849	ECU	Ecuador	developing	1.5	50%	1850	0.5	GDP per capita (MER)	429.646	202.288	227.358
850	EGY	Egypt	developing	1.5	50%	1850	0.5	GDP per capita (MER)	437.611	335.059	102.552
851	ERI	Eritrea	ldc	1.5	50%	1850	0.5	GDP per capita (MER)	446.14	322.197	123.943
852	ESP	Spain	developed	1.5	50%	1850	0.5	GDP per capita (MER)	321.072	-327.734	648.806
853	EST	Estonia	developed	1.5	50%	1850	0.5	GDP per capita (MER)	336.499	-2419.7	2756.2
854	ETH	Ethiopia	ldc	1.5	50%	1850	0.5	GDP per capita (MER)	447.671	400.302	47.3696
855	FIN	Finland	developed	1.5	50%	1850	0.5	GDP per capita (MER)	233.926	-964.717	1198.64
856	FJI	Fiji	developing	1.5	50%	1850	0.5	GDP per capita (MER)	432.565	181.815	250.75
857	FRA	France	developed	1.5	50%	1850	0.5	GDP per capita (MER)	279.34	-765.552	1044.89
858	FSM	Micronesia, Fed. Sts.	developing	1.5	50%	1850	0.5	GDP per capita (MER)	439.092	329.172	109.921
859	GAB	Gabon	developing	1.5	50%	1850	0.5	GDP per capita (MER)	430.984	-123.492	554.476
860	GBR	United Kingdom	developed	1.5	50%	1850	0.5	GDP per capita (MER)	255.544	-1478.04	1733.58
861	GEO	Georgia	developing	1.5	50%	1850	0.5	GDP per capita (MER)	424.985	-623.892	1048.88
862	GHA	Ghana	developing	1.5	50%	1850	0.5	GDP per capita (MER)	443.999	395.02	48.9796
863	GIN	Guinea	ldc	1.5	50%	1850	0.5	GDP per capita (MER)	447.268	347.546	99.7229
864	GMB	Gambia	ldc	1.5	50%	1850	0.5	GDP per capita (MER)	448.09	396.239	51.8508
865	GNB	Guinea-Bissau	ldc	1.5	50%	1850	0.5	GDP per capita (MER)	448.132	348.78	99.3519
866	GNQ	Equatorial Guinea	developing	1.5	50%	1850	0.5	GDP per capita (MER)	434.118	-12.3199	446.438
867	GRC	Greece	developed	1.5	50%	1850	0.5	GDP per capita (MER)	348.705	-557.903	906.608
868	GRD	Grenada	developing	1.5	50%	1850	0.5	GDP per capita (MER)	415.257	239.263	175.993
869	GTM	Guatemala	developing	1.5	50%	1850	0.5	GDP per capita (MER)	435.793	335.588	100.205
870	GUY	Guyana	developing	1.5	50%	1850	0.5	GDP per capita (MER)	404.134	-137.26	541.394
871	HND	Honduras	developing	1.5	50%	1850	0.5	GDP per capita (MER)	441.776	354.698	87.0776
872	HRV	Croatia	developed	1.5	50%	1850	0.5	GDP per capita (MER)	368.292	-429.005	797.297
873	HTI	Haiti	ldc	1.5	50%	1850	0.5	GDP per capita (MER)	445.346	361.951	83.3943
874	HUN	Hungary	developed	1.5	50%	1850	0.5	GDP per capita (MER)	371.279	-633.358	1004.64
875	IDN	Indonesia	developing	1.5	50%	1850	0.5	GDP per capita (MER)	434.382	277.709	156.673
876	IND	India	developing	1.5	50%	1850	0.5	GDP per capita (MER)	442.319	347.594	94.7255
877	IRL	Ireland	developed	1.5	50%	1850	0.5	GDP per capita (MER)	194.351	-930.623	1124.97
878	IRN	Iran	developing	1.5	50%	1850	0.5	GDP per capita (MER)	428.005	-50.526	478.531
879	IRQ	Iraq	developing	1.5	50%	1850	0.5	GDP per capita (MER)	438.478	212.308	226.17
880	ISL	Iceland	developed	1.5	50%	1850	0.5	GDP per capita (MER)	221.914	-930.344	1152.26
881	ISR	Israel	developed	1.5	50%	1850	0.5	GDP per capita (MER)	314.653	-92.1395	406.793
882	ITA	Italy	developed	1.5	50%	1850	0.5	GDP per capita (MER)	286.016	-580.779	866.796
883	JAM	Jamaica	developing	1.5	50%	1850	0.5	GDP per capita (MER)	423.911	-192.442	616.352
884	JOR	Jordan	developing	1.5	50%	1850	0.5	GDP per capita (MER)	436.908	312.418	124.49
885	JPN	Japan	developed	1.5	50%	1850	0.5	GDP per capita (MER)	253.409	-732.672	986.081
886	KAZ	Kazakhstan	developing	1.5	50%	1850	0.5	GDP per capita (MER)	411.295	-825.511	1236.81
887	KEN	Kenya	developing	1.5	50%	1850	0.5	GDP per capita (MER)	444.946	371.995	72.9507
888	KGZ	Kyrgyz Republic	developing	1.5	50%	1850	0.5	GDP per capita (MER)	446.155	176.403	269.752
889	KHM	Cambodia	ldc	1.5	50%	1850	0.5	GDP per capita (MER)	444.438	283.538	160.901
890	KIR	Kiribati	ldc	1.5	50%	1850	0.5	GDP per capita (MER)	445.465	412.464	33.0009
891	KNA	St. Kitts and Nevis	developing	1.5	50%	1850	0.5	GDP per capita (MER)	362.103	-229.306	591.409
892	KOR	South Korea	developed	1.5	50%	1850	0.5	GDP per capita (MER)	279.763	-412.282	692.044
893	KWT	Kuwait	developing	1.5	50%	1850	0.5	GDP per capita (MER)	412.263	-1264.41	1676.68
894	LAO	Laos	ldc	1.5	50%	1850	0.5	GDP per capita (MER)	440.862	293.104	147.758
895	LBN	Lebanon	developing	1.5	50%	1850	0.5	GDP per capita (MER)	418.089	27.3016	390.788
896	LBR	Liberia	ldc	1.5	50%	1850	0.5	GDP per capita (MER)	448.129	405.825	42.3043
897	LBY	Libya	developing	1.5	50%	1850	0.5	GDP per capita (MER)	417.04	-387.4	804.44
898	LCA	St. Lucia	developing	1.5	50%	1850	0.5	GDP per capita (MER)	406.358	166.016	240.342
899	LIE	Liechtenstein	developed	1.5	50%	1850	0.5	GDP per capita (MER)	289.77	-392.098	681.869
900	LKA	Sri Lanka	developing	1.5	50%	1850	0.5	GDP per capita (MER)	429.394	307.583	121.811
901	LSO	Lesotho	ldc	1.5	50%	1850	0.5	GDP per capita (MER)	446.297	288.325	157.972
902	LTU	Lithuania	developed	1.5	50%	1850	0.5	GDP per capita (MER)	342.528	-1374.78	1717.3
903	LUX	Luxembourg	developed	1.5	50%	1850	0.5	GDP per capita (MER)	194.351	-1667.48	1861.83
904	LVA	Latvia	developed	1.5	50%	1850	0.5	GDP per capita (MER)	349.485	-1107.76	1457.24
905	MAR	Morocco	developing	1.5	50%	1850	0.5	GDP per capita (MER)	437.416	323.602	113.815
906	MCO	Monaco	developed	1.5	50%	1850	0.5	GDP per capita (MER)	194.351	-227.791	422.141
907	MDA	Moldova	developed	1.5	50%	1850	0.5	GDP per capita (MER)	435.006	-585.152	1020.16
908	MDG	Madagascar	ldc	1.5	50%	1850	0.5	GDP per capita (MER)	448.681	373.477	75.2042
909	MDV	Maldives	developing	1.5	50%	1850	0.5	GDP per capita (MER)	408.578	326.655	81.9229
910	MEX	Mexico	developing	1.5	50%	1850	0.5	GDP per capita (MER)	411.24	76.5059	334.734
911	MHL	Marshall Islands	developing	1.5	50%	1850	0.5	GDP per capita (MER)	429.961	168.478	261.483
912	MKD	North Macedonia	developed	1.5	50%	1850	0.5	GDP per capita (MER)	423.539	-329.969	753.508
913	MLI	Mali	ldc	1.5	50%	1850	0.5	GDP per capita (MER)	448.239	371.582	76.6577
914	MLT	Malta	developed	1.5	50%	1850	0.5	GDP per capita (MER)	322.668	-68.0024	390.67
915	MMR	Myanmar	ldc	1.5	50%	1850	0.5	GDP per capita (MER)	444.384	351.396	92.9881
916	MNE	Montenegro	developed	1.5	50%	1850	0.5	GDP per capita (MER)	414.147	-221.765	635.912
917	MNG	Mongolia	developing	1.5	50%	1850	0.5	GDP per capita (MER)	435.836	-295.627	731.463
918	MOZ	Mozambique	ldc	1.5	50%	1850	0.5	GDP per capita (MER)	448.48	385.242	63.2375
919	MRT	Mauritania	ldc	1.5	50%	1850	0.5	GDP per capita (MER)	445.989	337.315	108.674
920	MUS	Mauritius	developing	1.5	50%	1850	0.5	GDP per capita (MER)	403.776	31.7966	371.979
921	MWI	Malawi	ldc	1.5	50%	1850	0.5	GDP per capita (MER)	448.862	421.295	27.5672
922	MYS	Malaysia	developing	1.5	50%	1850	0.5	GDP per capita (MER)	410.05	52.8563	357.194
923	NAM	Namibia	developing	1.5	50%	1850	0.5	GDP per capita (MER)	436.911	22.063	414.848
924	NER	Niger	ldc	1.5	50%	1850	0.5	GDP per capita (MER)	448.941	416.361	32.5799
925	NGA	Nigeria	developing	1.5	50%	1850	0.5	GDP per capita (MER)	443.507	347.803	95.7035
926	NIC	Nicaragua	developing	1.5	50%	1850	0.5	GDP per capita (MER)	442.713	261.868	180.845
927	NIU	Niue	developing	1.5	50%	1850	0.5	GDP per capita (MER)	412.263	39.1983	373.065
928	NLD	Netherlands	developed	1.5	50%	1850	0.5	GDP per capita (MER)	235	-1174.67	1409.67
929	NOR	Norway	developed	1.5	50%	1850	0.5	GDP per capita (MER)	194.351	-862.768	1057.12
930	NPL	Nepal	ldc	1.5	50%	1850	0.5	GDP per capita (MER)	445.992	333.074	112.919
931	NRU	Nauru	developing	1.5	50%	1850	0.5	GDP per capita (MER)	421.044	174.941	246.104
932	NZL	New Zealand	developed	1.5	50%	1850	0.5	GDP per capita (MER)	289.946	-1007.02	1296.96
933	OMN	Oman	developing	1.5	50%	1850	0.5	GDP per capita (MER)	389.747	-436.158	825.905
934	PAK	Pakistan	developing	1.5	50%	1850	0.5	GDP per capita (MER)	445.558	361.509	84.0497
935	PAN	Panama	developing	1.5	50%	1850	0.5	GDP per capita (MER)	401.287	195.967	205.32
936	PER	Peru	developing	1.5	50%	1850	0.5	GDP per capita (MER)	426.084	239.465	186.619
937	PHL	Philippines	developing	1.5	50%	1850	0.5	GDP per capita (MER)	438.789	351.312	87.4769
938	PLW	Palau	developing	1.5	50%	1850	0.5	GDP per capita (MER)	391.217	-2654.28	3045.5
939	PNG	Papua New Guinea	developing	1.5	50%	1850	0.5	GDP per capita (MER)	442.42	352.559	89.861
940	POL	Poland	developed	1.5	50%	1850	0.5	GDP per capita (MER)	371.105	-1014.79	1385.9
941	PRK	North Korea	developing	1.5	50%	1850	0.5	GDP per capita (MER)	412.263	-51.7136	463.977
942	PRT	Portugal	developed	1.5	50%	1850	0.5	GDP per capita (MER)	343.087	-312.635	655.722
943	PRY	Paraguay	developing	1.5	50%	1850	0.5	GDP per capita (MER)	427.354	-51.5383	478.892
944	QAT	Qatar	developing	1.5	50%	1850	0.5	GDP per capita (MER)	225.418	-2466.65	2692.07
945	ROU	Romania	developed	1.5	50%	1850	0.5	GDP per capita (MER)	391.724	-580.422	972.146
946	RUS	Russia	developed	1.5	50%	1850	0.5	GDP per capita (MER)	398.378	-1364.51	1762.89
947	RWA	Rwanda	ldc	1.5	50%	1850	0.5	GDP per capita (MER)	447.428	418.006	29.4219
948	SAU	Saudi Arabia	developing	1.5	50%	1850	0.5	GDP per capita (MER)	385.965	-254.512	640.477
949	SDN	Sudan	ldc	1.5	50%	1850	0.5	GDP per capita (MER)	445.483	337.375	108.109
950	SEN	Senegal	ldc	1.5	50%	1850	0.5	GDP per capita (MER)	446.398	376.673	69.7248
951	SGP	Singapore	developing	1.5	50%	1850	0.5	GDP per capita (MER)	194.351	-231.572	425.923
952	SLB	Solomon Islands	ldc	1.5	50%	1850	0.5	GDP per capita (MER)	444.44	407.536	36.904
953	SLE	Sierra Leone	ldc	1.5	50%	1850	0.5	GDP per capita (MER)	448.068	395.8	52.2685
954	SLV	El Salvador	developing	1.5	50%	1850	0.5	GDP per capita (MER)	431.743	265.683	166.06
955	SMR	San Marino	developed	1.5	50%	1850	0.5	GDP per capita (MER)	289.77	-367.055	656.826
956	SOM	Somalia	ldc	1.5	50%	1850	0.5	GDP per capita (MER)	448.899	341.428	107.471
957	SRB	Serbia	developed	1.5	50%	1850	0.5	GDP per capita (MER)	411.149	-674.656	1085.8
958	SSD	South Sudan	ldc	1.5	50%	1850	0.5	GDP per capita (MER)	446.14	99.6415	346.499
959	STP	Sao Tome and Principe	ldc	1.5	50%	1850	0.5	GDP per capita (MER)	445.087	403.412	41.6745
960	SUR	Suriname	developing	1.5	50%	1850	0.5	GDP per capita (MER)	422.607	-62.1213	484.728
961	SVK	Slovakia	developed	1.5	50%	1850	0.5	GDP per capita (MER)	362.07	-925.645	1287.71
962	SVN	Slovenia	developed	1.5	50%	1850	0.5	GDP per capita (MER)	330.147	-589.973	920.12
963	SWE	Sweden	developed	1.5	50%	1850	0.5	GDP per capita (MER)	231.58	-583.925	815.505
964	SWZ	Eswatini	developing	1.5	50%	1850	0.5	GDP per capita (MER)	436.83	246.93	189.901
965	SYC	Seychelles	developing	1.5	50%	1850	0.5	GDP per capita (MER)	384.745	86.1523	298.593
966	SYR	Syria	developing	1.5	50%	1850	0.5	GDP per capita (MER)	412.263	268.63	143.634
967	TCA	Turks and Caicos Islands	developing	1.5	50%	1850	0.5	GDP per capita (MER)	378.599	220.825	157.774
968	TCD	Chad	ldc	1.5	50%	1850	0.5	GDP per capita (MER)	448.53	372.81	75.7196
969	TGO	Togo	ldc	1.5	50%	1850	0.5	GDP per capita (MER)	448.198	377.073	71.1256
970	THA	Thailand	developing	1.5	50%	1850	0.5	GDP per capita (MER)	420.132	58.5453	361.587
971	TJK	Tajikistan	developing	1.5	50%	1850	0.5	GDP per capita (MER)	446.048	314.991	131.057
972	TKM	Turkmenistan	developing	1.5	50%	1850	0.5	GDP per capita (MER)	412.263	-417.047	829.31
973	TLS	Timor-Leste	ldc	1.5	50%	1850	0.5	GDP per capita (MER)	442.895	265.859	177.036
974	TON	Tonga	developing	1.5	50%	1850	0.5	GDP per capita (MER)	433.18	235.05	198.13
975	TTO	Trinidad and Tobago	developing	1.5	50%	1850	0.5	GDP per capita (MER)	382.875	-2820.45	3203.32
976	TUN	Tunisia	developing	1.5	50%	1850	0.5	GDP per capita (MER)	434.736	226.045	208.691
977	TUR	Türkiye	developing	1.5	50%	1850	0.5	GDP per capita (MER)	395.577	139.981	255.596
978	TUV	Tuvalu	ldc	1.5	50%	1850	0.5	GDP per capita (MER)	433.148	275.311	157.837
979	TZA	Tanzania	ldc	1.5	50%	1850	0.5	GDP per capita (MER)	447.551	389.408	58.1426
980	UGA	Uganda	ldc	1.5	50%	1850	0.5	GDP per capita (MER)	447.606	402.201	45.4045
981	UKR	Ukraine	developed	1.5	50%	1850	0.5	GDP per capita (MER)	435.634	-1633.27	2068.91
982	URY	Uruguay	developing	1.5	50%	1850	0.5	GDP per capita (MER)	374.914	-945.902	1320.82
983	USA	United States	developed	1.5	50%	1850	0.5	GDP per capita (MER)	199.338	-1884.19	2083.52
984	UZB	Uzbekistan	developing	1.5	50%	1850	0.5	GDP per capita (MER)	438.108	4.18658	433.921
985	VCT	St. Vincent and the Grenadines	developing	1.5	50%	1850	0.5	GDP per capita (MER)	412.444	130.499	281.945
986	VEN	Venezuela	developing	1.5	50%	1850	0.5	GDP per capita (MER)	412.263	-117.34	529.603
987	VGB	British Virgin Islands	developing	1.5	50%	1850	0.5	GDP per capita (MER)	412.263	133.008	279.255
988	VNM	Vietnam	developing	1.5	50%	1850	0.5	GDP per capita (MER)	435.55	276.785	158.765
989	VUT	Vanuatu	developing	1.5	50%	1850	0.5	GDP per capita (MER)	443.296	293.841	149.455
990	WSM	Samoa	developing	1.5	50%	1850	0.5	GDP per capita (MER)	437.707	294.561	143.146
991	YEM	Yemen	ldc	1.5	50%	1850	0.5	GDP per capita (MER)	446.14	392.019	54.1216
992	ZAF	South Africa	developing	1.5	50%	1850	0.5	GDP per capita (MER)	427.74	-86.1272	513.867
993	ZMB	Zambia	ldc	1.5	50%	1850	0.5	GDP per capita (MER)	446.815	332.93	113.884
994	ZWE	Zimbabwe	developing	1.5	50%	1850	0.5	GDP per capita (MER)	446.236	313.695	132.541
995	ABW	Aruba	developing	1.5	50%	1850	0.5	GDP per capita (PPP)	257.459	-4017.14	4274.6
996	AFG	Afghanistan	ldc	1.5	50%	1850	0.5	GDP per capita (PPP)	473.258	434.703	38.5556
997	AGO	Angola	ldc	1.5	50%	1850	0.5	GDP per capita (PPP)	463.265	340.477	122.789
998	AIA	Anguilla	developing	1.5	50%	1850	0.5	GDP per capita (PPP)	403.16	-76.1603	479.32
999	ALB	Albania	developed	1.5	50%	1850	0.5	GDP per capita (PPP)	394.969	90.4961	304.473
1000	AND	Andorra	developed	1.5	50%	1850	0.5	GDP per capita (PPP)	269.609	-237.901	507.51
1001	ARE	United Arab Emirates	developing	1.5	50%	1850	0.5	GDP per capita (PPP)	192.055	-739.722	931.777
1002	ARG	Argentina	developing	1.5	50%	1850	0.5	GDP per capita (PPP)	381.81	-165.136	546.946
1003	ARM	Armenia	developing	1.5	50%	1850	0.5	GDP per capita (PPP)	400.37	-172.765	573.135
1004	ATG	Antigua and Barbuda	developing	1.5	50%	1850	0.5	GDP per capita (PPP)	387.317	-113.752	501.069
1005	AUS	Australia	developed	1.5	50%	1850	0.5	GDP per capita (PPP)	274.095	-1047.47	1321.57
1006	AUT	Austria	developed	1.5	50%	1850	0.5	GDP per capita (PPP)	205.324	-856.343	1061.67
1007	AZE	Azerbaijan	developing	1.5	50%	1850	0.5	GDP per capita (PPP)	410.023	-268.976	678.999
1008	BDI	Burundi	ldc	1.5	50%	1850	0.5	GDP per capita (PPP)	475.536	455.398	20.1378
1009	BEL	Belgium	developed	1.5	50%	1850	0.5	GDP per capita (PPP)	218.162	-1396.23	1614.39
1010	BEN	Benin	ldc	1.5	50%	1850	0.5	GDP per capita (PPP)	468.817	424.097	44.7201
1011	BFA	Burkina Faso	ldc	1.5	50%	1850	0.5	GDP per capita (PPP)	471.42	423.571	47.849
1012	BGD	Bangladesh	ldc	1.5	50%	1850	0.5	GDP per capita (PPP)	452.807	407.639	45.1684
1013	BGR	Bulgaria	developed	1.5	50%	1850	0.5	GDP per capita (PPP)	307.696	-1134.4	1442.1
1014	BHR	Bahrain	developing	1.5	50%	1850	0.5	GDP per capita (PPP)	277.568	-1887.53	2165.1
1015	BHS	Bahamas	developing	1.5	50%	1850	0.5	GDP per capita (PPP)	340.578	-346.506	687.084
1016	BIH	Bosnia and Herzegovina	developed	1.5	50%	1850	0.5	GDP per capita (PPP)	382.274	-620.56	1002.83
1017	BLR	Belarus	developed	1.5	50%	1850	0.5	GDP per capita (PPP)	367.635	-882.573	1250.21
1018	BLZ	Belize	developing	1.5	50%	1850	0.5	GDP per capita (PPP)	444.825	170.493	274.331
1019	BOL	Bolivia	developing	1.5	50%	1850	0.5	GDP per capita (PPP)	448.073	267.103	180.97
1020	BRA	Brazil	developing	1.5	50%	1850	0.5	GDP per capita (PPP)	409.608	35.058	374.55
1021	BRB	Barbados	developing	1.5	50%	1850	0.5	GDP per capita (PPP)	405.117	-1376.21	1781.33
1022	BRN	Brunei Darussalam	developing	1.5	50%	1850	0.5	GDP per capita (PPP)	208.593	-2063.83	2272.43
1023	BTN	Bhutan	ldc	1.5	50%	1850	0.5	GDP per capita (PPP)	428.845	96.8462	331.998
1024	BWA	Botswana	developing	1.5	50%	1850	0.5	GDP per capita (PPP)	425.14	-23.9826	449.123
1025	CAF	Central African Republic	ldc	1.5	50%	1850	0.5	GDP per capita (PPP)	475.382	225.699	249.683
1026	CAN	Canada	developed	1.5	50%	1850	0.5	GDP per capita (PPP)	277.048	-1113.54	1390.59
1027	CHE	Switzerland	developed	1.5	50%	1850	0.5	GDP per capita (PPP)	191.883	-416.259	608.142
1028	CHL	Chile	developing	1.5	50%	1850	0.5	GDP per capita (PPP)	355.57	39.2432	316.327
1029	CHN	China	developing	1.5	50%	1850	0.5	GDP per capita (PPP)	382.942	-33.8765	416.819
1030	CIV	Cote d'Ivoire	developing	1.5	50%	1850	0.5	GDP per capita (PPP)	463.113	416.047	47.0658
1031	CMR	Cameroon	developing	1.5	50%	1850	0.5	GDP per capita (PPP)	467.547	395.839	71.7074
1032	COD	DR Congo	ldc	1.5	50%	1850	0.5	GDP per capita (PPP)	474.996	440.838	34.1587
1033	COG	Congo Republic	developing	1.5	50%	1850	0.5	GDP per capita (PPP)	468.267	257.131	211.136
1034	COK	Cook Islands	developing	1.5	50%	1850	0.5	GDP per capita (PPP)	403.16	34.4715	368.688
1035	COL	Colombia	developing	1.5	50%	1850	0.5	GDP per capita (PPP)	407.789	198.765	209.023
1036	COM	Comoros	ldc	1.5	50%	1850	0.5	GDP per capita (PPP)	466.717	394.899	71.8179
1037	CPV	Cabo Verde	developing	1.5	50%	1850	0.5	GDP per capita (PPP)	452.647	377.942	74.7056
1038	CRI	Costa Rica	developing	1.5	50%	1850	0.5	GDP per capita (PPP)	384.306	173.697	210.609
1039	CUB	Cuba	developing	1.5	50%	1850	0.5	GDP per capita (PPP)	403.16	-63.0972	466.257
1040	CYP	Cyprus	developed	1.5	50%	1850	0.5	GDP per capita (PPP)	346.606	-111.472	458.077
1041	CZE	Czech Republic	developed	1.5	50%	1850	0.5	GDP per capita (PPP)	270.658	-1414.82	1685.48
1042	DEU	Germany	developed	1.5	50%	1850	0.5	GDP per capita (PPP)	197.695	-1691.48	1889.17
1043	DJI	Djibouti	ldc	1.5	50%	1850	0.5	GDP per capita (PPP)	459.282	329.636	129.645
1044	DMA	Dominica	developing	1.5	50%	1850	0.5	GDP per capita (PPP)	424.24	161.982	262.258
1045	DNK	Denmark	developed	1.5	50%	1850	0.5	GDP per capita (PPP)	214.415	-1011.02	1225.43
1046	DOM	Dominican Republic	developing	1.5	50%	1850	0.5	GDP per capita (PPP)	398.777	213.456	185.321
1047	DZA	Algeria	developing	1.5	50%	1850	0.5	GDP per capita (PPP)	436.706	185.711	250.995
1048	ECU	Ecuador	developing	1.5	50%	1850	0.5	GDP per capita (PPP)	434.715	207.357	227.358
1049	EGY	Egypt	developing	1.5	50%	1850	0.5	GDP per capita (PPP)	437.941	335.389	102.552
1050	ERI	Eritrea	ldc	1.5	50%	1850	0.5	GDP per capita (PPP)	467.327	343.384	123.943
1051	ESP	Spain	developed	1.5	50%	1850	0.5	GDP per capita (PPP)	279.188	-369.618	648.806
1052	EST	Estonia	developed	1.5	50%	1850	0.5	GDP per capita (PPP)	258.175	-2498.03	2756.2
1053	ETH	Ethiopia	ldc	1.5	50%	1850	0.5	GDP per capita (PPP)	470.869	423.499	47.3696
1054	FIN	Finland	developed	1.5	50%	1850	0.5	GDP per capita (PPP)	222.332	-976.31	1198.64
1055	FJI	Fiji	developing	1.5	50%	1850	0.5	GDP per capita (PPP)	433.578	182.827	250.75
1056	FRA	France	developed	1.5	50%	1850	0.5	GDP per capita (PPP)	251.45	-793.442	1044.89
1057	FSM	Micronesia, Fed. Sts.	developing	1.5	50%	1850	0.5	GDP per capita (PPP)	463.515	353.594	109.921
1058	GAB	Gabon	developing	1.5	50%	1850	0.5	GDP per capita (PPP)	434.307	-120.169	554.476
1059	GBR	United Kingdom	developed	1.5	50%	1850	0.5	GDP per capita (PPP)	260.71	-1472.87	1733.58
1060	GEO	Georgia	developing	1.5	50%	1850	0.5	GDP per capita (PPP)	392.486	-656.391	1048.88
1061	GHA	Ghana	developing	1.5	50%	1850	0.5	GDP per capita (PPP)	460.274	411.295	48.9796
1062	GIN	Guinea	ldc	1.5	50%	1850	0.5	GDP per capita (PPP)	469.827	370.104	99.7229
1063	GMB	Gambia	ldc	1.5	50%	1850	0.5	GDP per capita (PPP)	471.497	419.646	51.8508
1064	GNB	Guinea-Bissau	ldc	1.5	50%	1850	0.5	GDP per capita (PPP)	471.885	372.533	99.3519
1065	GNQ	Equatorial Guinea	developing	1.5	50%	1850	0.5	GDP per capita (PPP)	434.481	-11.9566	446.438
1066	GRC	Greece	developed	1.5	50%	1850	0.5	GDP per capita (PPP)	310.55	-596.058	906.608
1067	GRD	Grenada	developing	1.5	50%	1850	0.5	GDP per capita (PPP)	414.746	238.753	175.993
1068	GTM	Guatemala	developing	1.5	50%	1850	0.5	GDP per capita (PPP)	446.309	346.105	100.205
1069	GUY	Guyana	developing	1.5	50%	1850	0.5	GDP per capita (PPP)	376.952	-164.442	541.394
1070	HND	Honduras	developing	1.5	50%	1850	0.5	GDP per capita (PPP)	457.272	370.195	87.0776
1071	HRV	Croatia	developed	1.5	50%	1850	0.5	GDP per capita (PPP)	293.444	-503.853	797.297
1072	HTI	Haiti	ldc	1.5	50%	1850	0.5	GDP per capita (PPP)	466.471	383.077	83.3943
1073	HUN	Hungary	developed	1.5	50%	1850	0.5	GDP per capita (PPP)	293.026	-711.611	1004.64
1074	IDN	Indonesia	developing	1.5	50%	1850	0.5	GDP per capita (PPP)	426.178	269.505	156.673
1075	IND	India	developing	1.5	50%	1850	0.5	GDP per capita (PPP)	449.581	354.855	94.7255
1076	IRL	Ireland	developed	1.5	50%	1850	0.5	GDP per capita (PPP)	191.883	-933.091	1124.97
1077	IRN	Iran	developing	1.5	50%	1850	0.5	GDP per capita (PPP)	410.713	-67.8184	478.531
1078	IRQ	Iraq	developing	1.5	50%	1850	0.5	GDP per capita (PPP)	451.173	225.004	226.17
1079	ISL	Iceland	developed	1.5	50%	1850	0.5	GDP per capita (PPP)	236.847	-915.411	1152.26
1080	ISR	Israel	developed	1.5	50%	1850	0.5	GDP per capita (PPP)	334.773	-72.0199	406.793
1081	ITA	Italy	developed	1.5	50%	1850	0.5	GDP per capita (PPP)	238.504	-628.292	866.796
1082	JAM	Jamaica	developing	1.5	50%	1850	0.5	GDP per capita (PPP)	422.936	-193.417	616.352
1083	JOR	Jordan	developing	1.5	50%	1850	0.5	GDP per capita (PPP)	443.09	318.6	124.49
1084	JPN	Japan	developed	1.5	50%	1850	0.5	GDP per capita (PPP)	245.015	-741.066	986.081
1085	KAZ	Kazakhstan	developing	1.5	50%	1850	0.5	GDP per capita (PPP)	380.464	-856.342	1236.81
1086	KEN	Kenya	developing	1.5	50%	1850	0.5	GDP per capita (PPP)	462.605	389.654	72.9507
1087	KGZ	Kyrgyz Republic	developing	1.5	50%	1850	0.5	GDP per capita (PPP)	460.268	190.515	269.752
1088	KHM	Cambodia	ldc	1.5	50%	1850	0.5	GDP per capita (PPP)	459.528	298.627	160.901
1089	KIR	Kiribati	ldc	1.5	50%	1850	0.5	GDP per capita (PPP)	470.742	437.741	33.0009
1090	KNA	St. Kitts and Nevis	developing	1.5	50%	1850	0.5	GDP per capita (PPP)	342.836	-248.573	591.409
1091	KOR	South Korea	developed	1.5	50%	1850	0.5	GDP per capita (PPP)	236.011	-456.033	692.044
1092	KWT	Kuwait	developing	1.5	50%	1850	0.5	GDP per capita (PPP)	403.16	-1273.52	1676.68
1093	LAO	Laos	ldc	1.5	50%	1850	0.5	GDP per capita (PPP)	447.551	299.794	147.758
1094	LBN	Lebanon	developing	1.5	50%	1850	0.5	GDP per capita (PPP)	403.841	13.053	390.788
1095	LBR	Liberia	ldc	1.5	50%	1850	0.5	GDP per capita (PPP)	473.206	430.901	42.3043
1096	LBY	Libya	developing	1.5	50%	1850	0.5	GDP per capita (PPP)	390.712	-413.728	804.44
1097	LCA	St. Lucia	developing	1.5	50%	1850	0.5	GDP per capita (PPP)	411.45	171.108	240.342
1098	LIE	Liechtenstein	developed	1.5	50%	1850	0.5	GDP per capita (PPP)	269.609	-412.26	681.869
1099	LKA	Sri Lanka	developing	1.5	50%	1850	0.5	GDP per capita (PPP)	409.357	287.546	121.811
1100	LSO	Lesotho	ldc	1.5	50%	1850	0.5	GDP per capita (PPP)	468.327	310.355	157.972
1101	LTU	Lithuania	developed	1.5	50%	1850	0.5	GDP per capita (PPP)	225.614	-1491.69	1717.3
1102	LUX	Luxembourg	developed	1.5	50%	1850	0.5	GDP per capita (PPP)	191.883	-1669.95	1861.83
1103	LVA	Latvia	developed	1.5	50%	1850	0.5	GDP per capita (PPP)	272.345	-1184.9	1457.24
1104	MAR	Morocco	developing	1.5	50%	1850	0.5	GDP per capita (PPP)	444.305	330.49	113.815
1105	MCO	Monaco	developed	1.5	50%	1850	0.5	GDP per capita (PPP)	269.609	-152.533	422.141
1106	MDA	Moldova	developed	1.5	50%	1850	0.5	GDP per capita (PPP)	416.228	-603.93	1020.16
1107	MDG	Madagascar	ldc	1.5	50%	1850	0.5	GDP per capita (PPP)	473.261	398.057	75.2042
1108	MDV	Maldives	developing	1.5	50%	1850	0.5	GDP per capita (PPP)	391.481	309.558	81.9229
1109	MEX	Mexico	developing	1.5	50%	1850	0.5	GDP per capita (PPP)	398.779	64.0452	334.734
1110	MHL	Marshall Islands	developing	1.5	50%	1850	0.5	GDP per capita (PPP)	452.878	191.395	261.483
1111	MKD	North Macedonia	developed	1.5	50%	1850	0.5	GDP per capita (PPP)	387.049	-366.459	753.508
1112	MLI	Mali	ldc	1.5	50%	1850	0.5	GDP per capita (PPP)	472.466	395.809	76.6577
1113	MLT	Malta	developed	1.5	50%	1850	0.5	GDP per capita (PPP)	256.533	-134.137	390.67
1114	MMR	Myanmar	ldc	1.5	50%	1850	0.5	GDP per capita (PPP)	459.257	366.269	92.9881
1115	MNE	Montenegro	developed	1.5	50%	1850	0.5	GDP per capita (PPP)	364.692	-271.221	635.912
1116	MNG	Mongolia	developing	1.5	50%	1850	0.5	GDP per capita (PPP)	434.124	-297.338	731.463
1117	MOZ	Mozambique	ldc	1.5	50%	1850	0.5	GDP per capita (PPP)	474.242	411.005	63.2375
1118	MRT	Mauritania	ldc	1.5	50%	1850	0.5	GDP per capita (PPP)	463.621	354.946	108.674
1119	MUS	Mauritius	developing	1.5	50%	1850	0.5	GDP per capita (PPP)	369.076	-2.90303	371.979
1120	MWI	Malawi	ldc	1.5	50%	1850	0.5	GDP per capita (PPP)	473.372	445.805	27.5672
1121	MYS	Malaysia	developing	1.5	50%	1850	0.5	GDP per capita (PPP)	369.589	12.3947	357.194
1122	NAM	Namibia	developing	1.5	50%	1850	0.5	GDP per capita (PPP)	446.769	31.9214	414.848
1123	NER	Niger	ldc	1.5	50%	1850	0.5	GDP per capita (PPP)	475.129	442.549	32.5799
1124	NGA	Nigeria	developing	1.5	50%	1850	0.5	GDP per capita (PPP)	463.443	367.74	95.7035
1125	NIC	Nicaragua	developing	1.5	50%	1850	0.5	GDP per capita (PPP)	456.119	275.274	180.845
1126	NIU	Niue	developing	1.5	50%	1850	0.5	GDP per capita (PPP)	403.16	30.0951	373.065
1127	NLD	Netherlands	developed	1.5	50%	1850	0.5	GDP per capita (PPP)	196.426	-1213.24	1409.67
1128	NOR	Norway	developed	1.5	50%	1850	0.5	GDP per capita (PPP)	191.883	-865.236	1057.12
1129	NPL	Nepal	ldc	1.5	50%	1850	0.5	GDP per capita (PPP)	461.972	349.053	112.919
1130	NRU	Nauru	developing	1.5	50%	1850	0.5	GDP per capita (PPP)	426.485	180.382	246.104
1131	NZL	New Zealand	developed	1.5	50%	1850	0.5	GDP per capita (PPP)	293.21	-1003.75	1296.96
1132	OMN	Oman	developing	1.5	50%	1850	0.5	GDP per capita (PPP)	354.84	-471.065	825.905
1133	PAK	Pakistan	developing	1.5	50%	1850	0.5	GDP per capita (PPP)	460.899	376.849	84.0497
1134	PAN	Panama	developing	1.5	50%	1850	0.5	GDP per capita (PPP)	367.183	161.864	205.32
1135	PER	Peru	developing	1.5	50%	1850	0.5	GDP per capita (PPP)	427.14	240.521	186.619
1136	PHL	Philippines	developing	1.5	50%	1850	0.5	GDP per capita (PPP)	448.161	360.684	87.4769
1137	PLW	Palau	developing	1.5	50%	1850	0.5	GDP per capita (PPP)	402.894	-2642.61	3045.5
1138	PNG	Papua New Guinea	developing	1.5	50%	1850	0.5	GDP per capita (PPP)	465.09	375.229	89.861
1139	POL	Poland	developed	1.5	50%	1850	0.5	GDP per capita (PPP)	289.789	-1096.11	1385.9
1140	PRK	North Korea	developing	1.5	50%	1850	0.5	GDP per capita (PPP)	403.16	-60.8168	463.977
1141	PRT	Portugal	developed	1.5	50%	1850	0.5	GDP per capita (PPP)	294.432	-361.29	655.722
1142	PRY	Paraguay	developing	1.5	50%	1850	0.5	GDP per capita (PPP)	423.942	-54.9504	478.892
1143	QAT	Qatar	developing	1.5	50%	1850	0.5	GDP per capita (PPP)	191.883	-2500.19	2692.07
1144	ROU	Romania	developed	1.5	50%	1850	0.5	GDP per capita (PPP)	297.34	-674.806	972.146
1145	RUS	Russia	developed	1.5	50%	1850	0.5	GDP per capita (PPP)	312.912	-1449.98	1762.89
1146	RWA	Rwanda	ldc	1.5	50%	1850	0.5	GDP per capita (PPP)	470.818	441.396	29.4219
1147	SAU	Saudi Arabia	developing	1.5	50%	1850	0.5	GDP per capita (PPP)	312.541	-327.936	640.477
1148	SDN	Sudan	ldc	1.5	50%	1850	0.5	GDP per capita (PPP)	467.361	359.252	108.109
1149	SEN	Senegal	ldc	1.5	50%	1850	0.5	GDP per capita (PPP)	468.303	398.578	69.7248
1150	SGP	Singapore	developing	1.5	50%	1850	0.5	GDP per capita (PPP)	191.883	-234.04	425.923
1151	SLB	Solomon Islands	ldc	1.5	50%	1850	0.5	GDP per capita (PPP)	470.398	433.494	36.904
1152	SLE	Sierra Leone	ldc	1.5	50%	1850	0.5	GDP per capita (PPP)	472.362	420.093	52.2685
1153	SLV	El Salvador	developing	1.5	50%	1850	0.5	GDP per capita (PPP)	434.126	268.065	166.06
1154	SMR	San Marino	developed	1.5	50%	1850	0.5	GDP per capita (PPP)	269.609	-387.217	656.826
1155	SOM	Somalia	ldc	1.5	50%	1850	0.5	GDP per capita (PPP)	474.703	367.232	107.471
1156	SRB	Serbia	developed	1.5	50%	1850	0.5	GDP per capita (PPP)	360.809	-724.996	1085.8
1157	SSD	South Sudan	ldc	1.5	50%	1850	0.5	GDP per capita (PPP)	467.327	120.828	346.499
1158	STP	Sao Tome and Principe	ldc	1.5	50%	1850	0.5	GDP per capita (PPP)	465.031	423.357	41.6745
1159	SUR	Suriname	developing	1.5	50%	1850	0.5	GDP per capita (PPP)	414.958	-69.7702	484.728
1160	SVK	Slovakia	developed	1.5	50%	1850	0.5	GDP per capita (PPP)	317.572	-970.143	1287.71
1161	SVN	Slovenia	developed	1.5	50%	1850	0.5	GDP per capita (PPP)	267.481	-652.639	920.12
1162	SWE	Sweden	developed	1.5	50%	1850	0.5	GDP per capita (PPP)	241.389	-574.116	815.505
1163	SWZ	Eswatini	developing	1.5	50%	1850	0.5	GDP per capita (PPP)	445.451	255.55	189.901
1164	SYC	Seychelles	developing	1.5	50%	1850	0.5	GDP per capita (PPP)	354.947	56.3537	298.593
1165	SYR	Syria	developing	1.5	50%	1850	0.5	GDP per capita (PPP)	403.16	259.526	143.634
1166	TCA	Turks and Caicos Islands	developing	1.5	50%	1850	0.5	GDP per capita (PPP)	398.342	240.567	157.774
1167	TCD	Chad	ldc	1.5	50%	1850	0.5	GDP per capita (PPP)	474.004	398.284	75.7196
1168	TGO	Togo	ldc	1.5	50%	1850	0.5	GDP per capita (PPP)	471.428	400.303	71.1256
1169	THA	Thailand	developing	1.5	50%	1850	0.5	GDP per capita (PPP)	387.262	25.6751	361.587
1170	TJK	Tajikistan	developing	1.5	50%	1850	0.5	GDP per capita (PPP)	464.841	333.784	131.057
1171	TKM	Turkmenistan	developing	1.5	50%	1850	0.5	GDP per capita (PPP)	403.16	-426.15	829.31
1172	TLS	Timor-Leste	ldc	1.5	50%	1850	0.5	GDP per capita (PPP)	458.962	281.926	177.036
1173	TON	Tonga	developing	1.5	50%	1850	0.5	GDP per capita (PPP)	452.54	254.41	198.13
1174	TTO	Trinidad and Tobago	developing	1.5	50%	1850	0.5	GDP per capita (PPP)	358.988	-2844.33	3203.32
1175	TUN	Tunisia	developing	1.5	50%	1850	0.5	GDP per capita (PPP)	433.36	224.669	208.691
1176	TUR	Türkiye	developing	1.5	50%	1850	0.5	GDP per capita (PPP)	354.737	99.1411	255.596
1177	TUV	Tuvalu	ldc	1.5	50%	1850	0.5	GDP per capita (PPP)	456.476	298.639	157.837
1178	TZA	Tanzania	ldc	1.5	50%	1850	0.5	GDP per capita (PPP)	471.231	413.088	58.1426
1179	UGA	Uganda	ldc	1.5	50%	1850	0.5	GDP per capita (PPP)	471.484	426.08	45.4045
1180	UKR	Ukraine	developed	1.5	50%	1850	0.5	GDP per capita (PPP)	395.857	-1673.05	2068.91
1181	URY	Uruguay	developing	1.5	50%	1850	0.5	GDP per capita (PPP)	360.27	-960.547	1320.82
1182	USA	United States	developed	1.5	50%	1850	0.5	GDP per capita (PPP)	199.313	-1884.21	2083.52
1183	UZB	Uzbekistan	developing	1.5	50%	1850	0.5	GDP per capita (PPP)	447.736	13.8146	433.921
1184	VCT	St. Vincent and the Grenadines	developing	1.5	50%	1850	0.5	GDP per capita (PPP)	407.083	125.137	281.945
1185	VEN	Venezuela	developing	1.5	50%	1850	0.5	GDP per capita (PPP)	403.16	-126.443	529.603
1186	VGB	British Virgin Islands	developing	1.5	50%	1850	0.5	GDP per capita (PPP)	403.16	123.905	279.255
1187	VNM	Vietnam	developing	1.5	50%	1850	0.5	GDP per capita (PPP)	428.944	270.178	158.765
1188	VUT	Vanuatu	developing	1.5	50%	1850	0.5	GDP per capita (PPP)	469.686	320.23	149.455
1189	WSM	Samoa	developing	1.5	50%	1850	0.5	GDP per capita (PPP)	458.441	315.295	143.146
1190	YEM	Yemen	ldc	1.5	50%	1850	0.5	GDP per capita (PPP)	467.327	413.205	54.1216
1191	ZAF	South Africa	developing	1.5	50%	1850	0.5	GDP per capita (PPP)	423.58	-90.287	513.867
1192	ZMB	Zambia	ldc	1.5	50%	1850	0.5	GDP per capita (PPP)	468.948	355.064	113.884
1193	ZWE	Zimbabwe	developing	1.5	50%	1850	0.5	GDP per capita (PPP)	470.964	338.424	132.541
1194	ABW	Aruba	developing	2	0%	1850	0.5	Equal per capita	506.943	-3767.66	4274.6
1195	AFG	Afghanistan	ldc	2	0%	1850	0.5	Equal per capita	506.943	468.388	38.5556
1196	AGO	Angola	ldc	2	0%	1850	0.5	Equal per capita	506.943	384.155	122.789
1197	AIA	Anguilla	developing	2	0%	1850	0.5	Equal per capita	506.943	27.623	479.32
1198	ALB	Albania	developed	2	0%	1850	0.5	Equal per capita	506.943	202.47	304.473
1199	AND	Andorra	developed	2	0%	1850	0.5	Equal per capita	506.943	-0.566558	507.51
1200	ARE	United Arab Emirates	developing	2	0%	1850	0.5	Equal per capita	506.943	-424.834	931.777
1201	ARG	Argentina	developing	2	0%	1850	0.5	Equal per capita	506.943	-40.0024	546.946
1202	ARM	Armenia	developing	2	0%	1850	0.5	Equal per capita	506.943	-66.1913	573.135
1203	ATG	Antigua and Barbuda	developing	2	0%	1850	0.5	Equal per capita	506.943	5.87431	501.069
1204	AUS	Australia	developed	2	0%	1850	0.5	Equal per capita	506.943	-814.626	1321.57
1205	AUT	Austria	developed	2	0%	1850	0.5	Equal per capita	506.943	-554.724	1061.67
1206	AZE	Azerbaijan	developing	2	0%	1850	0.5	Equal per capita	506.943	-172.055	678.999
1207	BDI	Burundi	ldc	2	0%	1850	0.5	Equal per capita	506.943	486.805	20.1378
1208	BEL	Belgium	developed	2	0%	1850	0.5	Equal per capita	506.943	-1107.45	1614.39
1209	BEN	Benin	ldc	2	0%	1850	0.5	Equal per capita	506.943	462.223	44.7201
1210	BFA	Burkina Faso	ldc	2	0%	1850	0.5	Equal per capita	506.943	459.094	47.849
1211	BGD	Bangladesh	ldc	2	0%	1850	0.5	Equal per capita	506.943	461.775	45.1684
1212	BGR	Bulgaria	developed	2	0%	1850	0.5	Equal per capita	506.943	-935.155	1442.1
1213	BHR	Bahrain	developing	2	0%	1850	0.5	Equal per capita	506.943	-1658.16	2165.1
1214	BHS	Bahamas	developing	2	0%	1850	0.5	Equal per capita	506.943	-180.141	687.084
1215	BIH	Bosnia and Herzegovina	developed	2	0%	1850	0.5	Equal per capita	506.943	-495.89	1002.83
1216	BLR	Belarus	developed	2	0%	1850	0.5	Equal per capita	506.943	-743.265	1250.21
1217	BLZ	Belize	developing	2	0%	1850	0.5	Equal per capita	506.943	232.612	274.331
1218	BOL	Bolivia	developing	2	0%	1850	0.5	Equal per capita	506.943	325.973	180.97
1219	BRA	Brazil	developing	2	0%	1850	0.5	Equal per capita	506.943	132.393	374.55
1220	BRB	Barbados	developing	2	0%	1850	0.5	Equal per capita	506.943	-1274.39	1781.33
1221	BRN	Brunei Darussalam	developing	2	0%	1850	0.5	Equal per capita	506.943	-1765.48	2272.43
1222	BTN	Bhutan	ldc	2	0%	1850	0.5	Equal per capita	506.943	174.945	331.998
1223	BWA	Botswana	developing	2	0%	1850	0.5	Equal per capita	506.943	57.8204	449.123
1224	CAF	Central African Republic	ldc	2	0%	1850	0.5	Equal per capita	506.943	257.26	249.683
1225	CAN	Canada	developed	2	0%	1850	0.5	Equal per capita	506.943	-883.649	1390.59
1226	CHE	Switzerland	developed	2	0%	1850	0.5	Equal per capita	506.943	-101.198	608.142
1227	CHL	Chile	developing	2	0%	1850	0.5	Equal per capita	506.943	190.616	316.327
1228	CHN	China	developing	2	0%	1850	0.5	Equal per capita	506.943	90.1246	416.819
1229	CIV	Cote d'Ivoire	developing	2	0%	1850	0.5	Equal per capita	506.943	459.877	47.0658
1230	CMR	Cameroon	developing	2	0%	1850	0.5	Equal per capita	506.943	435.236	71.7074
1231	COD	DR Congo	ldc	2	0%	1850	0.5	Equal per capita	506.943	472.785	34.1587
1232	COG	Congo Republic	developing	2	0%	1850	0.5	Equal per capita	506.943	295.807	211.136
1233	COK	Cook Islands	developing	2	0%	1850	0.5	Equal per capita	506.943	138.255	368.688
1234	COL	Colombia	developing	2	0%	1850	0.5	Equal per capita	506.943	297.92	209.023
1235	COM	Comoros	ldc	2	0%	1850	0.5	Equal per capita	506.943	435.125	71.8179
1236	CPV	Cabo Verde	developing	2	0%	1850	0.5	Equal per capita	506.943	432.238	74.7056
1237	CRI	Costa Rica	developing	2	0%	1850	0.5	Equal per capita	506.943	296.335	210.609
1238	CUB	Cuba	developing	2	0%	1850	0.5	Equal per capita	506.943	40.6861	466.257
1239	CYP	Cyprus	developed	2	0%	1850	0.5	Equal per capita	506.943	48.8661	458.077
1240	CZE	Czech Republic	developed	2	0%	1850	0.5	Equal per capita	506.943	-1178.54	1685.48
1241	DEU	Germany	developed	2	0%	1850	0.5	Equal per capita	506.943	-1382.23	1889.17
1242	DJI	Djibouti	ldc	2	0%	1850	0.5	Equal per capita	506.943	377.298	129.645
1243	DMA	Dominica	developing	2	0%	1850	0.5	Equal per capita	506.943	244.686	262.258
1244	DNK	Denmark	developed	2	0%	1850	0.5	Equal per capita	506.943	-718.487	1225.43
1245	DOM	Dominican Republic	developing	2	0%	1850	0.5	Equal per capita	506.943	321.622	185.321
1246	DZA	Algeria	developing	2	0%	1850	0.5	Equal per capita	506.943	255.948	250.995
1247	ECU	Ecuador	developing	2	0%	1850	0.5	Equal per capita	506.943	279.585	227.358
1248	EGY	Egypt	developing	2	0%	1850	0.5	Equal per capita	506.943	404.392	102.552
1249	ERI	Eritrea	ldc	2	0%	1850	0.5	Equal per capita	506.943	383	123.943
1250	ESP	Spain	developed	2	0%	1850	0.5	Equal per capita	506.943	-141.863	648.806
1251	EST	Estonia	developed	2	0%	1850	0.5	Equal per capita	506.943	-2249.26	2756.2
1252	ETH	Ethiopia	ldc	2	0%	1850	0.5	Equal per capita	506.943	459.574	47.3696
1253	FIN	Finland	developed	2	0%	1850	0.5	Equal per capita	506.943	-691.699	1198.64
1254	FJI	Fiji	developing	2	0%	1850	0.5	Equal per capita	506.943	256.193	250.75
1255	FRA	France	developed	2	0%	1850	0.5	Equal per capita	506.943	-537.949	1044.89
1256	FSM	Micronesia, Fed. Sts.	developing	2	0%	1850	0.5	Equal per capita	506.943	397.023	109.921
1257	GAB	Gabon	developing	2	0%	1850	0.5	Equal per capita	506.943	-47.5329	554.476
1258	GBR	United Kingdom	developed	2	0%	1850	0.5	Equal per capita	506.943	-1226.64	1733.58
1259	GEO	Georgia	developing	2	0%	1850	0.5	Equal per capita	506.943	-541.933	1048.88
1260	GHA	Ghana	developing	2	0%	1850	0.5	Equal per capita	506.943	457.964	48.9796
1261	GIN	Guinea	ldc	2	0%	1850	0.5	Equal per capita	506.943	407.22	99.7229
1262	GMB	Gambia	ldc	2	0%	1850	0.5	Equal per capita	506.943	455.092	51.8508
1263	GNB	Guinea-Bissau	ldc	2	0%	1850	0.5	Equal per capita	506.943	407.591	99.3519
1264	GNQ	Equatorial Guinea	developing	2	0%	1850	0.5	Equal per capita	506.943	60.5054	446.438
1265	GRC	Greece	developed	2	0%	1850	0.5	Equal per capita	506.943	-399.665	906.608
1266	GRD	Grenada	developing	2	0%	1850	0.5	Equal per capita	506.943	330.95	175.993
1267	GTM	Guatemala	developing	2	0%	1850	0.5	Equal per capita	506.943	406.738	100.205
1268	GUY	Guyana	developing	2	0%	1850	0.5	Equal per capita	506.943	-34.4506	541.394
1269	HND	Honduras	developing	2	0%	1850	0.5	Equal per capita	506.943	419.866	87.0776
1270	HRV	Croatia	developed	2	0%	1850	0.5	Equal per capita	506.943	-290.354	797.297
1271	HTI	Haiti	ldc	2	0%	1850	0.5	Equal per capita	506.943	423.549	83.3943
1272	HUN	Hungary	developed	2	0%	1850	0.5	Equal per capita	506.943	-497.694	1004.64
1273	IDN	Indonesia	developing	2	0%	1850	0.5	Equal per capita	506.943	350.27	156.673
1274	IND	India	developing	2	0%	1850	0.5	Equal per capita	506.943	412.218	94.7255
1275	IRL	Ireland	developed	2	0%	1850	0.5	Equal per capita	506.943	-618.031	1124.97
1276	IRN	Iran	developing	2	0%	1850	0.5	Equal per capita	506.943	28.4119	478.531
1277	IRQ	Iraq	developing	2	0%	1850	0.5	Equal per capita	506.943	280.773	226.17
1278	ISL	Iceland	developed	2	0%	1850	0.5	Equal per capita	506.943	-645.315	1152.26
1279	ISR	Israel	developed	2	0%	1850	0.5	Equal per capita	506.943	100.151	406.793
1280	ITA	Italy	developed	2	0%	1850	0.5	Equal per capita	506.943	-359.852	866.796
1281	JAM	Jamaica	developing	2	0%	1850	0.5	Equal per capita	506.943	-109.409	616.352
1282	JOR	Jordan	developing	2	0%	1850	0.5	Equal per capita	506.943	382.453	124.49
1283	JPN	Japan	developed	2	0%	1850	0.5	Equal per capita	506.943	-479.138	986.081
1284	KAZ	Kazakhstan	developing	2	0%	1850	0.5	Equal per capita	506.943	-729.862	1236.81
1285	KEN	Kenya	developing	2	0%	1850	0.5	Equal per capita	506.943	433.993	72.9507
1286	KGZ	Kyrgyz Republic	developing	2	0%	1850	0.5	Equal per capita	506.943	237.191	269.752
1287	KHM	Cambodia	ldc	2	0%	1850	0.5	Equal per capita	506.943	346.042	160.901
1288	KIR	Kiribati	ldc	2	0%	1850	0.5	Equal per capita	506.943	473.942	33.0009
1289	KNA	St. Kitts and Nevis	developing	2	0%	1850	0.5	Equal per capita	506.943	-84.4656	591.409
1290	KOR	South Korea	developed	2	0%	1850	0.5	Equal per capita	506.943	-185.101	692.044
1291	KWT	Kuwait	developing	2	0%	1850	0.5	Equal per capita	506.943	-1169.73	1676.68
1292	LAO	Laos	ldc	2	0%	1850	0.5	Equal per capita	506.943	359.186	147.758
1293	LBN	Lebanon	developing	2	0%	1850	0.5	Equal per capita	506.943	116.156	390.788
1294	LBR	Liberia	ldc	2	0%	1850	0.5	Equal per capita	506.943	464.639	42.3043
1295	LBY	Libya	developing	2	0%	1850	0.5	Equal per capita	506.943	-297.497	804.44
1296	LCA	St. Lucia	developing	2	0%	1850	0.5	Equal per capita	506.943	266.601	240.342
1297	LIE	Liechtenstein	developed	2	0%	1850	0.5	Equal per capita	506.943	-174.925	681.869
1298	LKA	Sri Lanka	developing	2	0%	1850	0.5	Equal per capita	506.943	385.132	121.811
1299	LSO	Lesotho	ldc	2	0%	1850	0.5	Equal per capita	506.943	348.971	157.972
1300	LTU	Lithuania	developed	2	0%	1850	0.5	Equal per capita	506.943	-1210.36	1717.3
1301	LUX	Luxembourg	developed	2	0%	1850	0.5	Equal per capita	506.943	-1354.89	1861.83
1302	LVA	Latvia	developed	2	0%	1850	0.5	Equal per capita	506.943	-950.299	1457.24
1303	MAR	Morocco	developing	2	0%	1850	0.5	Equal per capita	506.943	393.129	113.815
1304	MCO	Monaco	developed	2	0%	1850	0.5	Equal per capita	506.943	84.8021	422.141
1305	MDA	Moldova	developed	2	0%	1850	0.5	Equal per capita	506.943	-513.214	1020.16
1306	MDG	Madagascar	ldc	2	0%	1850	0.5	Equal per capita	506.943	431.739	75.2042
1307	MDV	Maldives	developing	2	0%	1850	0.5	Equal per capita	506.943	425.02	81.9229
1308	MEX	Mexico	developing	2	0%	1850	0.5	Equal per capita	506.943	172.21	334.734
1309	MHL	Marshall Islands	developing	2	0%	1850	0.5	Equal per capita	506.943	245.461	261.483
1310	MKD	North Macedonia	developed	2	0%	1850	0.5	Equal per capita	506.943	-246.564	753.508
1311	MLI	Mali	ldc	2	0%	1850	0.5	Equal per capita	506.943	430.286	76.6577
1312	MLT	Malta	developed	2	0%	1850	0.5	Equal per capita	506.943	116.273	390.67
1313	MMR	Myanmar	ldc	2	0%	1850	0.5	Equal per capita	506.943	413.955	92.9881
1314	MNE	Montenegro	developed	2	0%	1850	0.5	Equal per capita	506.943	-128.969	635.912
1315	MNG	Mongolia	developing	2	0%	1850	0.5	Equal per capita	506.943	-224.519	731.463
1316	MOZ	Mozambique	ldc	2	0%	1850	0.5	Equal per capita	506.943	443.706	63.2375
1317	MRT	Mauritania	ldc	2	0%	1850	0.5	Equal per capita	506.943	398.269	108.674
1318	MUS	Mauritius	developing	2	0%	1850	0.5	Equal per capita	506.943	134.964	371.979
1319	MWI	Malawi	ldc	2	0%	1850	0.5	Equal per capita	506.943	479.376	27.5672
1320	MYS	Malaysia	developing	2	0%	1850	0.5	Equal per capita	506.943	149.75	357.194
1321	NAM	Namibia	developing	2	0%	1850	0.5	Equal per capita	506.943	92.0954	414.848
1322	NER	Niger	ldc	2	0%	1850	0.5	Equal per capita	506.943	474.363	32.5799
1323	NGA	Nigeria	developing	2	0%	1850	0.5	Equal per capita	506.943	411.24	95.7035
1324	NIC	Nicaragua	developing	2	0%	1850	0.5	Equal per capita	506.943	326.098	180.845
1325	NIU	Niue	developing	2	0%	1850	0.5	Equal per capita	506.943	133.878	373.065
1326	NLD	Netherlands	developed	2	0%	1850	0.5	Equal per capita	506.943	-902.726	1409.67
1327	NOR	Norway	developed	2	0%	1850	0.5	Equal per capita	506.943	-550.176	1057.12
1328	NPL	Nepal	ldc	2	0%	1850	0.5	Equal per capita	506.943	394.025	112.919
1329	NRU	Nauru	developing	2	0%	1850	0.5	Equal per capita	506.943	260.84	246.104
1330	NZL	New Zealand	developed	2	0%	1850	0.5	Equal per capita	506.943	-790.021	1296.96
1331	OMN	Oman	developing	2	0%	1850	0.5	Equal per capita	506.943	-318.961	825.905
1332	PAK	Pakistan	developing	2	0%	1850	0.5	Equal per capita	506.943	422.894	84.0497
1333	PAN	Panama	developing	2	0%	1850	0.5	Equal per capita	506.943	301.624	205.32
1334	PER	Peru	developing	2	0%	1850	0.5	Equal per capita	506.943	320.324	186.619
1335	PHL	Philippines	developing	2	0%	1850	0.5	Equal per capita	506.943	419.466	87.4769
1336	PLW	Palau	developing	2	0%	1850	0.5	Equal per capita	506.943	-2538.56	3045.5
1337	PNG	Papua New Guinea	developing	2	0%	1850	0.5	Equal per capita	506.943	417.082	89.861
1338	POL	Poland	developed	2	0%	1850	0.5	Equal per capita	506.943	-878.955	1385.9
1339	PRK	North Korea	developing	2	0%	1850	0.5	Equal per capita	506.943	42.9665	463.977
1340	PRT	Portugal	developed	2	0%	1850	0.5	Equal per capita	506.943	-148.778	655.722
1341	PRY	Paraguay	developing	2	0%	1850	0.5	Equal per capita	506.943	28.0513	478.892
1342	QAT	Qatar	developing	2	0%	1850	0.5	Equal per capita	506.943	-2185.13	2692.07
1343	ROU	Romania	developed	2	0%	1850	0.5	Equal per capita	506.943	-465.202	972.146
1344	RUS	Russia	developed	2	0%	1850	0.5	Equal per capita	506.943	-1255.95	1762.89
1345	RWA	Rwanda	ldc	2	0%	1850	0.5	Equal per capita	506.943	477.521	29.4219
1346	SAU	Saudi Arabia	developing	2	0%	1850	0.5	Equal per capita	506.943	-133.533	640.477
1347	SDN	Sudan	ldc	2	0%	1850	0.5	Equal per capita	506.943	398.835	108.109
1348	SEN	Senegal	ldc	2	0%	1850	0.5	Equal per capita	506.943	437.218	69.7248
1349	SGP	Singapore	developing	2	0%	1850	0.5	Equal per capita	506.943	81.0205	425.923
1350	SLB	Solomon Islands	ldc	2	0%	1850	0.5	Equal per capita	506.943	470.039	36.904
1351	SLE	Sierra Leone	ldc	2	0%	1850	0.5	Equal per capita	506.943	454.675	52.2685
1352	SLV	El Salvador	developing	2	0%	1850	0.5	Equal per capita	506.943	340.883	166.06
1353	SMR	San Marino	developed	2	0%	1850	0.5	Equal per capita	506.943	-149.882	656.826
1354	SOM	Somalia	ldc	2	0%	1850	0.5	Equal per capita	506.943	399.472	107.471
1355	SRB	Serbia	developed	2	0%	1850	0.5	Equal per capita	506.943	-578.861	1085.8
1356	SSD	South Sudan	ldc	2	0%	1850	0.5	Equal per capita	506.943	160.445	346.499
1357	STP	Sao Tome and Principe	ldc	2	0%	1850	0.5	Equal per capita	506.943	465.269	41.6745
1358	SUR	Suriname	developing	2	0%	1850	0.5	Equal per capita	506.943	22.2154	484.728
1359	SVK	Slovakia	developed	2	0%	1850	0.5	Equal per capita	506.943	-780.771	1287.71
1360	SVN	Slovenia	developed	2	0%	1850	0.5	Equal per capita	506.943	-413.177	920.12
1361	SWE	Sweden	developed	2	0%	1850	0.5	Equal per capita	506.943	-308.562	815.505
1362	SWZ	Eswatini	developing	2	0%	1850	0.5	Equal per capita	506.943	317.042	189.901
1363	SYC	Seychelles	developing	2	0%	1850	0.5	Equal per capita	506.943	208.35	298.593
1364	SYR	Syria	developing	2	0%	1850	0.5	Equal per capita	506.943	363.31	143.634
1365	TCA	Turks and Caicos Islands	developing	2	0%	1850	0.5	Equal per capita	506.943	349.169	157.774
1366	TCD	Chad	ldc	2	0%	1850	0.5	Equal per capita	506.943	431.224	75.7196
1367	TGO	Togo	ldc	2	0%	1850	0.5	Equal per capita	506.943	435.818	71.1256
1368	THA	Thailand	developing	2	0%	1850	0.5	Equal per capita	506.943	145.356	361.587
1369	TJK	Tajikistan	developing	2	0%	1850	0.5	Equal per capita	506.943	375.886	131.057
1370	TKM	Turkmenistan	developing	2	0%	1850	0.5	Equal per capita	506.943	-322.367	829.31
1371	TLS	Timor-Leste	ldc	2	0%	1850	0.5	Equal per capita	506.943	329.908	177.036
1372	TON	Tonga	developing	2	0%	1850	0.5	Equal per capita	506.943	308.813	198.13
1373	TTO	Trinidad and Tobago	developing	2	0%	1850	0.5	Equal per capita	506.943	-2696.38	3203.32
1374	TUN	Tunisia	developing	2	0%	1850	0.5	Equal per capita	506.943	298.252	208.691
1375	TUR	Türkiye	developing	2	0%	1850	0.5	Equal per capita	506.943	251.347	255.596
1376	TUV	Tuvalu	ldc	2	0%	1850	0.5	Equal per capita	506.943	349.106	157.837
1377	TZA	Tanzania	ldc	2	0%	1850	0.5	Equal per capita	506.943	448.801	58.1426
1378	UGA	Uganda	ldc	2	0%	1850	0.5	Equal per capita	506.943	461.539	45.4045
1379	UKR	Ukraine	developed	2	0%	1850	0.5	Equal per capita	506.943	-1561.96	2068.91
1380	URY	Uruguay	developing	2	0%	1850	0.5	Equal per capita	506.943	-813.873	1320.82
1381	USA	United States	developed	2	0%	1850	0.5	Equal per capita	506.943	-1576.58	2083.52
1382	UZB	Uzbekistan	developing	2	0%	1850	0.5	Equal per capita	506.943	73.0221	433.921
1383	VCT	St. Vincent and the Grenadines	developing	2	0%	1850	0.5	Equal per capita	506.943	224.998	281.945
1384	VEN	Venezuela	developing	2	0%	1850	0.5	Equal per capita	506.943	-22.6595	529.603
1385	VGB	British Virgin Islands	developing	2	0%	1850	0.5	Equal per capita	506.943	227.688	279.255
1386	VNM	Vietnam	developing	2	0%	1850	0.5	Equal per capita	506.943	348.178	158.765
1387	VUT	Vanuatu	developing	2	0%	1850	0.5	Equal per capita	506.943	357.488	149.455
1388	WSM	Samoa	developing	2	0%	1850	0.5	Equal per capita	506.943	363.798	143.146
1389	YEM	Yemen	ldc	2	0%	1850	0.5	Equal per capita	506.943	452.822	54.1216
1390	ZAF	South Africa	developing	2	0%	1850	0.5	Equal per capita	506.943	-6.92411	513.867
1391	ZMB	Zambia	ldc	2	0%	1850	0.5	Equal per capita	506.943	393.059	113.884
1392	ZWE	Zimbabwe	developing	2	0%	1850	0.5	Equal per capita	506.943	374.403	132.541
1393	ABW	Aruba	developing	2	50%	1850	0.5	10-year bond yield	522.26	-3752.34	4274.6
1394	AFG	Afghanistan	ldc	2	50%	1850	0.5	10-year bond yield	667.25	628.695	38.5556
1395	AGO	Angola	ldc	2	50%	1850	0.5	10-year bond yield	540.931	418.143	122.789
1396	AIA	Anguilla	developing	2	50%	1850	0.5	10-year bond yield	522.26	42.9393	479.32
1397	ALB	Albania	developed	2	50%	1850	0.5	10-year bond yield	427.029	122.556	304.473
1398	AND	Andorra	developed	2	50%	1850	0.5	10-year bond yield	385.374	-122.136	507.51
1399	ARE	United Arab Emirates	developing	2	50%	1850	0.5	10-year bond yield	522.26	-409.517	931.777
1400	ARG	Argentina	developing	2	50%	1850	0.5	10-year bond yield	522.26	-24.686	546.946
1401	ARM	Armenia	developing	2	50%	1850	0.5	10-year bond yield	522.26	-50.875	573.135
1402	ATG	Antigua and Barbuda	developing	2	50%	1850	0.5	10-year bond yield	522.26	21.1906	501.069
1403	AUS	Australia	developed	2	50%	1850	0.5	10-year bond yield	362.797	-958.772	1321.57
1404	AUT	Austria	developed	2	50%	1850	0.5	10-year bond yield	340.473	-721.194	1061.67
1405	AZE	Azerbaijan	developing	2	50%	1850	0.5	10-year bond yield	522.26	-156.739	678.999
1406	BDI	Burundi	ldc	2	50%	1850	0.5	10-year bond yield	667.25	647.112	20.1378
1407	BEL	Belgium	developed	2	50%	1850	0.5	10-year bond yield	341.22	-1273.17	1614.39
1408	BEN	Benin	ldc	2	50%	1850	0.5	10-year bond yield	667.25	622.53	44.7201
1409	BFA	Burkina Faso	ldc	2	50%	1850	0.5	10-year bond yield	667.25	619.401	47.849
1410	BGD	Bangladesh	ldc	2	50%	1850	0.5	10-year bond yield	508.95	463.782	45.1684
1411	BGR	Bulgaria	developed	2	50%	1850	0.5	10-year bond yield	398.892	-1043.21	1442.1
1412	BHR	Bahrain	developing	2	50%	1850	0.5	10-year bond yield	426.674	-1738.43	2165.1
1413	BHS	Bahamas	developing	2	50%	1850	0.5	10-year bond yield	522.26	-164.824	687.084
1414	BIH	Bosnia and Herzegovina	developed	2	50%	1850	0.5	10-year bond yield	385.374	-617.459	1002.83
1415	BLR	Belarus	developed	2	50%	1850	0.5	10-year bond yield	385.374	-864.834	1250.21
1416	BLZ	Belize	developing	2	50%	1850	0.5	10-year bond yield	522.26	247.929	274.331
1417	BOL	Bolivia	developing	2	50%	1850	0.5	10-year bond yield	522.26	341.289	180.97
1418	BRA	Brazil	developing	2	50%	1850	0.5	10-year bond yield	653.209	278.659	374.55
1419	BRB	Barbados	developing	2	50%	1850	0.5	10-year bond yield	522.26	-1259.07	1781.33
1420	BRN	Brunei Darussalam	developing	2	50%	1850	0.5	10-year bond yield	522.26	-1750.17	2272.43
1421	BTN	Bhutan	ldc	2	50%	1850	0.5	10-year bond yield	667.25	335.252	331.998
1422	BWA	Botswana	developing	2	50%	1850	0.5	10-year bond yield	470.533	21.4104	449.123
1423	CAF	Central African Republic	ldc	2	50%	1850	0.5	10-year bond yield	667.25	417.567	249.683
1424	CAN	Canada	developed	2	50%	1850	0.5	10-year bond yield	345.523	-1045.07	1390.59
1425	CHE	Switzerland	developed	2	50%	1850	0.5	10-year bond yield	277.738	-330.404	608.142
1426	CHL	Chile	developing	2	50%	1850	0.5	10-year bond yield	426.706	110.379	316.327
1427	CHN	China	developing	2	50%	1850	0.5	10-year bond yield	329.835	-86.9833	416.819
1428	CIV	Cote d'Ivoire	developing	2	50%	1850	0.5	10-year bond yield	522.26	475.194	47.0658
1429	CMR	Cameroon	developing	2	50%	1850	0.5	10-year bond yield	522.26	450.552	71.7074
1430	COD	DR Congo	ldc	2	50%	1850	0.5	10-year bond yield	667.25	633.092	34.1587
1431	COG	Congo Republic	developing	2	50%	1850	0.5	10-year bond yield	522.26	311.123	211.136
1432	COK	Cook Islands	developing	2	50%	1850	0.5	10-year bond yield	522.26	153.571	368.688
1433	COL	Colombia	developing	2	50%	1850	0.5	10-year bond yield	647.626	438.603	209.023
1434	COM	Comoros	ldc	2	50%	1850	0.5	10-year bond yield	667.25	595.432	71.8179
1435	CPV	Cabo Verde	developing	2	50%	1850	0.5	10-year bond yield	522.26	447.554	74.7056
1436	CRI	Costa Rica	developing	2	50%	1850	0.5	10-year bond yield	522.26	311.651	210.609
1437	CUB	Cuba	developing	2	50%	1850	0.5	10-year bond yield	522.26	56.0025	466.257
1438	CYP	Cyprus	developed	2	50%	1850	0.5	10-year bond yield	371.054	-87.0233	458.077
1439	CZE	Czech Republic	developed	2	50%	1850	0.5	10-year bond yield	395.295	-1290.19	1685.48
1440	DEU	Germany	developed	2	50%	1850	0.5	10-year bond yield	319.013	-1570.16	1889.17
1441	DJI	Djibouti	ldc	2	50%	1850	0.5	10-year bond yield	667.25	537.605	129.645
1442	DMA	Dominica	developing	2	50%	1850	0.5	10-year bond yield	522.26	260.002	262.258
1443	DNK	Denmark	developed	2	50%	1850	0.5	10-year bond yield	327.033	-898.397	1225.43
1444	DOM	Dominican Republic	developing	2	50%	1850	0.5	10-year bond yield	522.26	336.939	185.321
1445	DZA	Algeria	developing	2	50%	1850	0.5	10-year bond yield	522.26	271.265	250.995
1446	ECU	Ecuador	developing	2	50%	1850	0.5	10-year bond yield	522.26	294.901	227.358
1447	EGY	Egypt	developing	2	50%	1850	0.5	10-year bond yield	777.617	675.065	102.552
1448	ERI	Eritrea	ldc	2	50%	1850	0.5	10-year bond yield	667.25	543.307	123.943
1449	ESP	Spain	developed	2	50%	1850	0.5	10-year bond yield	353.963	-294.843	648.806
1450	EST	Estonia	developed	2	50%	1850	0.5	10-year bond yield	385.374	-2370.83	2756.2
1451	ETH	Ethiopia	ldc	2	50%	1850	0.5	10-year bond yield	451.866	404.496	47.3696
1452	FIN	Finland	developed	2	50%	1850	0.5	10-year bond yield	337.297	-861.345	1198.64
1453	FJI	Fiji	developing	2	50%	1850	0.5	10-year bond yield	522.26	271.509	250.75
1454	FRA	France	developed	2	50%	1850	0.5	10-year bond yield	334.848	-710.045	1044.89
1455	FSM	Micronesia, Fed. Sts.	developing	2	50%	1850	0.5	10-year bond yield	522.26	412.339	109.921
1456	GAB	Gabon	developing	2	50%	1850	0.5	10-year bond yield	522.26	-32.2166	554.476
1457	GBR	United Kingdom	developed	2	50%	1850	0.5	10-year bond yield	360.433	-1373.15	1733.58
1458	GEO	Georgia	developing	2	50%	1850	0.5	10-year bond yield	522.26	-526.617	1048.88
1459	GHA	Ghana	developing	2	50%	1850	0.5	10-year bond yield	522.26	473.28	48.9796
1460	GIN	Guinea	ldc	2	50%	1850	0.5	10-year bond yield	667.25	567.527	99.7229
1461	GMB	Gambia	ldc	2	50%	1850	0.5	10-year bond yield	667.25	615.399	51.8508
1462	GNB	Guinea-Bissau	ldc	2	50%	1850	0.5	10-year bond yield	667.25	567.898	99.3519
1463	GNQ	Equatorial Guinea	developing	2	50%	1850	0.5	10-year bond yield	522.26	75.8217	446.438
1464	GRC	Greece	developed	2	50%	1850	0.5	10-year bond yield	379.139	-527.469	906.608
1465	GRD	Grenada	developing	2	50%	1850	0.5	10-year bond yield	522.26	346.266	175.993
1466	GTM	Guatemala	developing	2	50%	1850	0.5	10-year bond yield	522.26	422.055	100.205
1467	GUY	Guyana	developing	2	50%	1850	0.5	10-year bond yield	522.26	-19.1343	541.394
1468	HND	Honduras	developing	2	50%	1850	0.5	10-year bond yield	522.26	435.182	87.0776
1469	HRV	Croatia	developed	2	50%	1850	0.5	10-year bond yield	365.543	-431.754	797.297
1470	HTI	Haiti	ldc	2	50%	1850	0.5	10-year bond yield	667.25	583.856	83.3943
1471	HUN	Hungary	developed	2	50%	1850	0.5	10-year bond yield	516.162	-488.476	1004.64
1472	IDN	Indonesia	developing	2	50%	1850	0.5	10-year bond yield	461.162	304.489	156.673
1473	IND	India	developing	2	50%	1850	0.5	10-year bond yield	478.068	383.343	94.7255
1474	IRL	Ireland	developed	2	50%	1850	0.5	10-year bond yield	335.46	-789.514	1124.97
1475	IRN	Iran	developing	2	50%	1850	0.5	10-year bond yield	726.022	247.49	478.531
1476	IRQ	Iraq	developing	2	50%	1850	0.5	10-year bond yield	454.25	228.081	226.17
1477	ISL	Iceland	developed	2	50%	1850	0.5	10-year bond yield	475.984	-676.274	1152.26
1478	ISR	Israel	developed	2	50%	1850	0.5	10-year bond yield	368.05	-38.7426	406.793
1479	ITA	Italy	developed	2	50%	1850	0.5	10-year bond yield	381.03	-485.766	866.796
1480	JAM	Jamaica	developing	2	50%	1850	0.5	10-year bond yield	522.26	-94.0928	616.352
1481	JOR	Jordan	developing	2	50%	1850	0.5	10-year bond yield	341.22	216.729	124.49
1482	JPN	Japan	developed	2	50%	1850	0.5	10-year bond yield	259.206	-726.876	986.081
1483	KAZ	Kazakhstan	developing	2	50%	1850	0.5	10-year bond yield	648.106	-588.7	1236.81
1484	KEN	Kenya	developing	2	50%	1850	0.5	10-year bond yield	684.815	611.864	72.9507
1485	KGZ	Kyrgyz Republic	developing	2	50%	1850	0.5	10-year bond yield	522.26	252.508	269.752
1486	KHM	Cambodia	ldc	2	50%	1850	0.5	10-year bond yield	667.25	506.349	160.901
1487	KIR	Kiribati	ldc	2	50%	1850	0.5	10-year bond yield	667.25	634.249	33.0009
1488	KNA	St. Kitts and Nevis	developing	2	50%	1850	0.5	10-year bond yield	522.26	-69.1492	591.409
1489	KOR	South Korea	developed	2	50%	1850	0.5	10-year bond yield	355.36	-336.685	692.044
1490	KWT	Kuwait	developing	2	50%	1850	0.5	10-year bond yield	362.06	-1314.62	1676.68
1491	LAO	Laos	ldc	2	50%	1850	0.5	10-year bond yield	667.25	519.493	147.758
1492	LBN	Lebanon	developing	2	50%	1850	0.5	10-year bond yield	522.26	131.472	390.788
1493	LBR	Liberia	ldc	2	50%	1850	0.5	10-year bond yield	667.25	624.946	42.3043
1494	LBY	Libya	developing	2	50%	1850	0.5	10-year bond yield	522.26	-282.18	804.44
1495	LCA	St. Lucia	developing	2	50%	1850	0.5	10-year bond yield	522.26	281.918	240.342
1496	LIE	Liechtenstein	developed	2	50%	1850	0.5	10-year bond yield	385.374	-296.495	681.869
1497	LKA	Sri Lanka	developing	2	50%	1850	0.5	10-year bond yield	777.617	655.806	121.811
1498	LSO	Lesotho	ldc	2	50%	1850	0.5	10-year bond yield	667.25	509.278	157.972
1499	LTU	Lithuania	developed	2	50%	1850	0.5	10-year bond yield	387.847	-1329.46	1717.3
1500	LUX	Luxembourg	developed	2	50%	1850	0.5	10-year bond yield	385.374	-1476.46	1861.83
1501	LVA	Latvia	developed	2	50%	1850	0.5	10-year bond yield	317.913	-1139.33	1457.24
1502	MAR	Morocco	developing	2	50%	1850	0.5	10-year bond yield	377.611	263.796	113.815
1503	MCO	Monaco	developed	2	50%	1850	0.5	10-year bond yield	385.374	-36.7675	422.141
1504	MDA	Moldova	developed	2	50%	1850	0.5	10-year bond yield	385.374	-634.784	1020.16
1505	MDG	Madagascar	ldc	2	50%	1850	0.5	10-year bond yield	667.25	592.046	75.2042
1506	MDV	Maldives	developing	2	50%	1850	0.5	10-year bond yield	522.26	440.337	81.9229
1507	MEX	Mexico	developing	2	50%	1850	0.5	10-year bond yield	539.996	205.262	334.734
1508	MHL	Marshall Islands	developing	2	50%	1850	0.5	10-year bond yield	522.26	260.777	261.483
1509	MKD	North Macedonia	developed	2	50%	1850	0.5	10-year bond yield	385.374	-368.134	753.508
1510	MLI	Mali	ldc	2	50%	1850	0.5	10-year bond yield	667.25	590.593	76.6577
1511	MLT	Malta	developed	2	50%	1850	0.5	10-year bond yield	353.188	-37.4823	390.67
1512	MMR	Myanmar	ldc	2	50%	1850	0.5	10-year bond yield	667.25	574.262	92.9881
1513	MNE	Montenegro	developed	2	50%	1850	0.5	10-year bond yield	385.374	-250.539	635.912
1514	MNG	Mongolia	developing	2	50%	1850	0.5	10-year bond yield	522.26	-209.203	731.463
1515	MOZ	Mozambique	ldc	2	50%	1850	0.5	10-year bond yield	667.25	604.013	63.2375
1516	MRT	Mauritania	ldc	2	50%	1850	0.5	10-year bond yield	667.25	558.576	108.674
1517	MUS	Mauritius	developing	2	50%	1850	0.5	10-year bond yield	416.408	44.4286	371.979
1518	MWI	Malawi	ldc	2	50%	1850	0.5	10-year bond yield	667.25	639.683	27.5672
1519	MYS	Malaysia	developing	2	50%	1850	0.5	10-year bond yield	364.589	7.39521	357.194
1520	NAM	Namibia	developing	2	50%	1850	0.5	10-year bond yield	445.97	31.1223	414.848
1521	NER	Niger	ldc	2	50%	1850	0.5	10-year bond yield	667.25	634.67	32.5799
1522	NGA	Nigeria	developing	2	50%	1850	0.5	10-year bond yield	675.141	579.438	95.7035
1523	NIC	Nicaragua	developing	2	50%	1850	0.5	10-year bond yield	522.26	341.415	180.845
1524	NIU	Niue	developing	2	50%	1850	0.5	10-year bond yield	522.26	149.195	373.065
1525	NLD	Netherlands	developed	2	50%	1850	0.5	10-year bond yield	329.238	-1080.43	1409.67
1526	NOR	Norway	developed	2	50%	1850	0.5	10-year bond yield	350.136	-706.983	1057.12
1527	NPL	Nepal	ldc	2	50%	1850	0.5	10-year bond yield	667.25	554.332	112.919
1528	NRU	Nauru	developing	2	50%	1850	0.5	10-year bond yield	522.26	276.156	246.104
1529	NZL	New Zealand	developed	2	50%	1850	0.5	10-year bond yield	388.788	-908.177	1296.96
1530	OMN	Oman	developing	2	50%	1850	0.5	10-year bond yield	522.26	-303.645	825.905
1531	PAK	Pakistan	developing	2	50%	1850	0.5	10-year bond yield	721.122	637.072	84.0497
1532	PAN	Panama	developing	2	50%	1850	0.5	10-year bond yield	522.26	316.94	205.32
1533	PER	Peru	developing	2	50%	1850	0.5	10-year bond yield	496.108	309.489	186.619
1534	PHL	Philippines	developing	2	50%	1850	0.5	10-year bond yield	443.67	356.193	87.4769
1535	PLW	Palau	developing	2	50%	1850	0.5	10-year bond yield	522.26	-2523.24	3045.5
1536	PNG	Papua New Guinea	developing	2	50%	1850	0.5	10-year bond yield	522.26	432.399	89.861
1537	POL	Poland	developed	2	50%	1850	0.5	10-year bond yield	449.988	-935.91	1385.9
1538	PRK	North Korea	developing	2	50%	1850	0.5	10-year bond yield	522.26	58.2828	463.977
1539	PRT	Portugal	developed	2	50%	1850	0.5	10-year bond yield	348.481	-307.24	655.722
1540	PRY	Paraguay	developing	2	50%	1850	0.5	10-year bond yield	522.26	43.3677	478.892
1541	QAT	Qatar	developing	2	50%	1850	0.5	10-year bond yield	367.248	-2324.82	2692.07
1542	ROU	Romania	developed	2	50%	1850	0.5	10-year bond yield	488.841	-483.305	972.146
1543	RUS	Russia	developed	2	50%	1850	0.5	10-year bond yield	585.348	-1177.54	1762.89
1544	RWA	Rwanda	ldc	2	50%	1850	0.5	10-year bond yield	667.25	637.828	29.4219
1545	SAU	Saudi Arabia	developing	2	50%	1850	0.5	10-year bond yield	376.581	-263.896	640.477
1546	SDN	Sudan	ldc	2	50%	1850	0.5	10-year bond yield	667.25	559.142	108.109
1547	SEN	Senegal	ldc	2	50%	1850	0.5	10-year bond yield	667.25	597.525	69.7248
1548	SGP	Singapore	developing	2	50%	1850	0.5	10-year bond yield	345.134	-80.7892	425.923
1549	SLB	Solomon Islands	ldc	2	50%	1850	0.5	10-year bond yield	667.25	630.346	36.904
1550	SLE	Sierra Leone	ldc	2	50%	1850	0.5	10-year bond yield	667.25	614.982	52.2685
1551	SLV	El Salvador	developing	2	50%	1850	0.5	10-year bond yield	522.26	356.199	166.06
1552	SMR	San Marino	developed	2	50%	1850	0.5	10-year bond yield	385.374	-271.452	656.826
1553	SOM	Somalia	ldc	2	50%	1850	0.5	10-year bond yield	667.25	559.779	107.471
1554	SRB	Serbia	developed	2	50%	1850	0.5	10-year bond yield	470.879	-614.925	1085.8
1555	SSD	South Sudan	ldc	2	50%	1850	0.5	10-year bond yield	667.25	320.752	346.499
1556	STP	Sao Tome and Principe	ldc	2	50%	1850	0.5	10-year bond yield	667.25	625.576	41.6745
1557	SUR	Suriname	developing	2	50%	1850	0.5	10-year bond yield	522.26	37.5317	484.728
1558	SVK	Slovakia	developed	2	50%	1850	0.5	10-year bond yield	350.912	-936.802	1287.71
1559	SVN	Slovenia	developed	2	50%	1850	0.5	10-year bond yield	358.755	-561.365	920.12
1560	SWE	Sweden	developed	2	50%	1850	0.5	10-year bond yield	322.188	-493.318	815.505
1561	SWZ	Eswatini	developing	2	50%	1850	0.5	10-year bond yield	522.26	332.359	189.901
1562	SYC	Seychelles	developing	2	50%	1850	0.5	10-year bond yield	522.26	223.667	298.593
1563	SYR	Syria	developing	2	50%	1850	0.5	10-year bond yield	522.26	378.626	143.634
1564	TCA	Turks and Caicos Islands	developing	2	50%	1850	0.5	10-year bond yield	522.26	364.485	157.774
1565	TCD	Chad	ldc	2	50%	1850	0.5	10-year bond yield	667.25	591.531	75.7196
1566	TGO	Togo	ldc	2	50%	1850	0.5	10-year bond yield	667.25	596.125	71.1256
1567	THA	Thailand	developing	2	50%	1850	0.5	10-year bond yield	316.83	-44.7576	361.587
1568	TJK	Tajikistan	developing	2	50%	1850	0.5	10-year bond yield	522.26	391.203	131.057
1569	TKM	Turkmenistan	developing	2	50%	1850	0.5	10-year bond yield	522.26	-307.051	829.31
1570	TLS	Timor-Leste	ldc	2	50%	1850	0.5	10-year bond yield	667.25	490.215	177.036
1571	TON	Tonga	developing	2	50%	1850	0.5	10-year bond yield	522.26	324.129	198.13
1572	TTO	Trinidad and Tobago	developing	2	50%	1850	0.5	10-year bond yield	522.26	-2681.06	3203.32
1573	TUN	Tunisia	developing	2	50%	1850	0.5	10-year bond yield	522.26	313.568	208.691
1574	TUR	Türkiye	developing	2	50%	1850	0.5	10-year bond yield	563.699	308.103	255.596
1575	TUV	Tuvalu	ldc	2	50%	1850	0.5	10-year bond yield	667.25	509.413	157.837
1576	TZA	Tanzania	ldc	2	50%	1850	0.5	10-year bond yield	636.429	578.286	58.1426
1577	UGA	Uganda	ldc	2	50%	1850	0.5	10-year bond yield	718.747	673.343	45.4045
1578	UKR	Ukraine	developed	2	50%	1850	0.5	10-year bond yield	744.114	-1324.79	2068.91
1579	URY	Uruguay	developing	2	50%	1850	0.5	10-year bond yield	522.26	-798.557	1320.82
1580	USA	United States	developed	2	50%	1850	0.5	10-year bond yield	364.577	-1718.95	2083.52
1581	UZB	Uzbekistan	developing	2	50%	1850	0.5	10-year bond yield	522.26	88.3384	433.921
1582	VCT	St. Vincent and the Grenadines	developing	2	50%	1850	0.5	10-year bond yield	522.26	240.315	281.945
1583	VEN	Venezuela	developing	2	50%	1850	0.5	10-year bond yield	568.719	39.1167	529.603
1584	VGB	British Virgin Islands	developing	2	50%	1850	0.5	10-year bond yield	522.26	243.005	279.255
1585	VNM	Vietnam	developing	2	50%	1850	0.5	10-year bond yield	383.333	224.567	158.765
1586	VUT	Vanuatu	developing	2	50%	1850	0.5	10-year bond yield	522.26	372.804	149.455
1587	WSM	Samoa	developing	2	50%	1850	0.5	10-year bond yield	522.26	379.114	143.146
1588	YEM	Yemen	ldc	2	50%	1850	0.5	10-year bond yield	667.25	613.129	54.1216
1589	ZAF	South Africa	developing	2	50%	1850	0.5	10-year bond yield	559.007	45.1392	513.867
1590	ZMB	Zambia	ldc	2	50%	1850	0.5	10-year bond yield	777.617	663.732	113.884
1591	ZWE	Zimbabwe	developing	2	50%	1850	0.5	10-year bond yield	522.26	389.719	132.541
1592	ABW	Aruba	developing	2	50%	1850	0.5	Historical fossil fuel sales (not considering colonies)	524.902	-3749.7	4274.6
1593	AFG	Afghanistan	ldc	2	50%	1850	0.5	Historical fossil fuel sales (not considering colonies)	524.65	486.094	38.5556
1594	AGO	Angola	ldc	2	50%	1850	0.5	Historical fossil fuel sales (not considering colonies)	502.111	379.323	122.789
1595	AIA	Anguilla	developing	2	50%	1850	0.5	Historical fossil fuel sales (not considering colonies)	524.902	45.5821	479.32
1596	ALB	Albania	developed	2	50%	1850	0.5	Historical fossil fuel sales (not considering colonies)	502.555	198.082	304.473
1597	AND	Andorra	developed	2	50%	1850	0.5	Historical fossil fuel sales (not considering colonies)	524.902	17.3926	507.51
1598	ARE	United Arab Emirates	developing	2	50%	1850	0.5	Historical fossil fuel sales (not considering colonies)	244.479	-687.298	931.777
1599	ARG	Argentina	developing	2	50%	1850	0.5	Historical fossil fuel sales (not considering colonies)	495.217	-51.7286	546.946
1600	ARM	Armenia	developing	2	50%	1850	0.5	Historical fossil fuel sales (not considering colonies)	524.902	-48.2322	573.135
1601	ATG	Antigua and Barbuda	developing	2	50%	1850	0.5	Historical fossil fuel sales (not considering colonies)	524.902	23.8335	501.069
1602	AUS	Australia	developed	2	50%	1850	0.5	Historical fossil fuel sales (not considering colonies)	442.028	-879.542	1321.57
1603	AUT	Austria	developed	2	50%	1850	0.5	Historical fossil fuel sales (not considering colonies)	511.351	-550.316	1061.67
1604	AZE	Azerbaijan	developing	2	50%	1850	0.5	Historical fossil fuel sales (not considering colonies)	441.401	-237.598	678.999
1605	BDI	Burundi	ldc	2	50%	1850	0.5	Historical fossil fuel sales (not considering colonies)	524.902	504.765	20.1378
1606	BEL	Belgium	developed	2	50%	1850	0.5	Historical fossil fuel sales (not considering colonies)	514.548	-1099.84	1614.39
1607	BEN	Benin	ldc	2	50%	1850	0.5	Historical fossil fuel sales (not considering colonies)	524.814	480.093	44.7201
1608	BFA	Burkina Faso	ldc	2	50%	1850	0.5	Historical fossil fuel sales (not considering colonies)	524.902	477.053	47.849
1609	BGD	Bangladesh	ldc	2	50%	1850	0.5	Historical fossil fuel sales (not considering colonies)	524.144	478.976	45.1684
1610	BGR	Bulgaria	developed	2	50%	1850	0.5	Historical fossil fuel sales (not considering colonies)	510.064	-932.034	1442.1
1611	BHR	Bahrain	developing	2	50%	1850	0.5	Historical fossil fuel sales (not considering colonies)	403.331	-1761.77	2165.1
1612	BHS	Bahamas	developing	2	50%	1850	0.5	Historical fossil fuel sales (not considering colonies)	524.902	-162.182	687.084
1613	BIH	Bosnia and Herzegovina	developed	2	50%	1850	0.5	Historical fossil fuel sales (not considering colonies)	522.243	-480.59	1002.83
1614	BLR	Belarus	developed	2	50%	1850	0.5	Historical fossil fuel sales (not considering colonies)	520.856	-729.352	1250.21
1615	BLZ	Belize	developing	2	50%	1850	0.5	Historical fossil fuel sales (not considering colonies)	521.227	246.896	274.331
1616	BOL	Bolivia	developing	2	50%	1850	0.5	Historical fossil fuel sales (not considering colonies)	514.137	333.167	180.97
1617	BRA	Brazil	developing	2	50%	1850	0.5	Historical fossil fuel sales (not considering colonies)	513.552	139.002	374.55
1618	BRB	Barbados	developing	2	50%	1850	0.5	Historical fossil fuel sales (not considering colonies)	517.501	-1263.83	1781.33
1619	BRN	Brunei Darussalam	developing	2	50%	1850	0.5	Historical fossil fuel sales (not considering colonies)	244.479	-2027.95	2272.43
1620	BTN	Bhutan	ldc	2	50%	1850	0.5	Historical fossil fuel sales (not considering colonies)	524.768	192.769	331.998
1621	BWA	Botswana	developing	2	50%	1850	0.5	Historical fossil fuel sales (not considering colonies)	524.093	74.9704	449.123
1622	CAF	Central African Republic	ldc	2	50%	1850	0.5	Historical fossil fuel sales (not considering colonies)	524.902	275.219	249.683
1623	CAN	Canada	developed	2	50%	1850	0.5	Historical fossil fuel sales (not considering colonies)	363.987	-1026.61	1390.59
1624	CHE	Switzerland	developed	2	50%	1850	0.5	Historical fossil fuel sales (not considering colonies)	524.899	-83.2424	608.142
1625	CHL	Chile	developing	2	50%	1850	0.5	Historical fossil fuel sales (not considering colonies)	521.028	204.701	316.327
1626	CHN	China	developing	2	50%	1850	0.5	Historical fossil fuel sales (not considering colonies)	514.651	97.832	416.819
1627	CIV	Cote d'Ivoire	developing	2	50%	1850	0.5	Historical fossil fuel sales (not considering colonies)	523.878	476.812	47.0658
1628	CMR	Cameroon	developing	2	50%	1850	0.5	Historical fossil fuel sales (not considering colonies)	522.113	450.406	71.7074
1629	COD	DR Congo	ldc	2	50%	1850	0.5	Historical fossil fuel sales (not considering colonies)	524.728	490.569	34.1587
1630	COG	Congo Republic	developing	2	50%	1850	0.5	Historical fossil fuel sales (not considering colonies)	491.617	280.481	211.136
1631	COK	Cook Islands	developing	2	50%	1850	0.5	Historical fossil fuel sales (not considering colonies)	524.902	156.214	368.688
1632	COL	Colombia	developing	2	50%	1850	0.5	Historical fossil fuel sales (not considering colonies)	501.487	292.464	209.023
1633	COM	Comoros	ldc	2	50%	1850	0.5	Historical fossil fuel sales (not considering colonies)	524.902	453.085	71.8179
1634	CPV	Cabo Verde	developing	2	50%	1850	0.5	Historical fossil fuel sales (not considering colonies)	524.902	450.197	74.7056
1635	CRI	Costa Rica	developing	2	50%	1850	0.5	Historical fossil fuel sales (not considering colonies)	524.902	314.294	210.609
1636	CUB	Cuba	developing	2	50%	1850	0.5	Historical fossil fuel sales (not considering colonies)	518.489	52.2316	466.257
1637	CYP	Cyprus	developed	2	50%	1850	0.5	Historical fossil fuel sales (not considering colonies)	524.902	66.8252	458.077
1638	CZE	Czech Republic	developed	2	50%	1850	0.5	Historical fossil fuel sales (not considering colonies)	507.469	-1178.01	1685.48
1639	DEU	Germany	developed	2	50%	1850	0.5	Historical fossil fuel sales (not considering colonies)	499.572	-1389.6	1889.17
1640	DJI	Djibouti	ldc	2	50%	1850	0.5	Historical fossil fuel sales (not considering colonies)	524.902	395.257	129.645
1641	DMA	Dominica	developing	2	50%	1850	0.5	Historical fossil fuel sales (not considering colonies)	524.902	262.645	262.258
1642	DNK	Denmark	developed	2	50%	1850	0.5	Historical fossil fuel sales (not considering colonies)	472.466	-752.965	1225.43
1643	DOM	Dominican Republic	developing	2	50%	1850	0.5	Historical fossil fuel sales (not considering colonies)	524.902	339.582	185.321
1644	DZA	Algeria	developing	2	50%	1850	0.5	Historical fossil fuel sales (not considering colonies)	471.657	220.662	250.995
1645	ECU	Ecuador	developing	2	50%	1850	0.5	Historical fossil fuel sales (not considering colonies)	492.075	264.717	227.358
1646	EGY	Egypt	developing	2	50%	1850	0.5	Historical fossil fuel sales (not considering colonies)	514.959	412.407	102.552
1647	ERI	Eritrea	ldc	2	50%	1850	0.5	Historical fossil fuel sales (not considering colonies)	524.902	400.96	123.943
1648	ESP	Spain	developed	2	50%	1850	0.5	Historical fossil fuel sales (not considering colonies)	521.698	-127.108	648.806
1649	EST	Estonia	developed	2	50%	1850	0.5	Historical fossil fuel sales (not considering colonies)	524.902	-2231.3	2756.2
1650	ETH	Ethiopia	ldc	2	50%	1850	0.5	Historical fossil fuel sales (not considering colonies)	524.902	477.533	47.3696
1651	FIN	Finland	developed	2	50%	1850	0.5	Historical fossil fuel sales (not considering colonies)	524.902	-673.74	1198.64
1652	FJI	Fiji	developing	2	50%	1850	0.5	Historical fossil fuel sales (not considering colonies)	524.902	274.152	250.75
1653	FRA	France	developed	2	50%	1850	0.5	Historical fossil fuel sales (not considering colonies)	519.013	-525.879	1044.89
1654	FSM	Micronesia, Fed. Sts.	developing	2	50%	1850	0.5	Historical fossil fuel sales (not considering colonies)	524.902	414.982	109.921
1655	GAB	Gabon	developing	2	50%	1850	0.5	Historical fossil fuel sales (not considering colonies)	418.967	-135.51	554.476
1656	GBR	United Kingdom	developed	2	50%	1850	0.5	Historical fossil fuel sales (not considering colonies)	457.858	-1275.72	1733.58
1657	GEO	Georgia	developing	2	50%	1850	0.5	Historical fossil fuel sales (not considering colonies)	524.42	-524.457	1048.88
1658	GHA	Ghana	developing	2	50%	1850	0.5	Historical fossil fuel sales (not considering colonies)	524.173	475.193	48.9796
1659	GIN	Guinea	ldc	2	50%	1850	0.5	Historical fossil fuel sales (not considering colonies)	524.902	425.18	99.7229
1660	GMB	Gambia	ldc	2	50%	1850	0.5	Historical fossil fuel sales (not considering colonies)	524.902	473.052	51.8508
1661	GNB	Guinea-Bissau	ldc	2	50%	1850	0.5	Historical fossil fuel sales (not considering colonies)	524.902	425.551	99.3519
1662	GNQ	Equatorial Guinea	developing	2	50%	1850	0.5	Historical fossil fuel sales (not considering colonies)	426.238	-20.1995	446.438
1663	GRC	Greece	developed	2	50%	1850	0.5	Historical fossil fuel sales (not considering colonies)	518.294	-388.314	906.608
1664	GRD	Grenada	developing	2	50%	1850	0.5	Historical fossil fuel sales (not considering colonies)	524.902	348.909	175.993
1665	GTM	Guatemala	developing	2	50%	1850	0.5	Historical fossil fuel sales (not considering colonies)	524.252	424.047	100.205
1666	GUY	Guyana	developing	2	50%	1850	0.5	Historical fossil fuel sales (not considering colonies)	524.902	-16.4915	541.394
1667	HND	Honduras	developing	2	50%	1850	0.5	Historical fossil fuel sales (not considering colonies)	524.902	437.825	87.0776
1668	HRV	Croatia	developed	2	50%	1850	0.5	Historical fossil fuel sales (not considering colonies)	513.93	-283.367	797.297
1669	HTI	Haiti	ldc	2	50%	1850	0.5	Historical fossil fuel sales (not considering colonies)	524.902	441.508	83.3943
1670	HUN	Hungary	developed	2	50%	1850	0.5	Historical fossil fuel sales (not considering colonies)	501.725	-502.913	1004.64
1671	IDN	Indonesia	developing	2	50%	1850	0.5	Historical fossil fuel sales (not considering colonies)	513.164	356.49	156.673
1672	IND	India	developing	2	50%	1850	0.5	Historical fossil fuel sales (not considering colonies)	523.29	428.565	94.7255
1673	IRL	Ireland	developed	2	50%	1850	0.5	Historical fossil fuel sales (not considering colonies)	521.744	-603.23	1124.97
1674	IRN	Iran	developing	2	50%	1850	0.5	Historical fossil fuel sales (not considering colonies)	446.265	-32.2666	478.531
1675	IRQ	Iraq	developing	2	50%	1850	0.5	Historical fossil fuel sales (not considering colonies)	465.207	239.037	226.17
1676	ISL	Iceland	developed	2	50%	1850	0.5	Historical fossil fuel sales (not considering colonies)	524.902	-627.356	1152.26
1677	ISR	Israel	developed	2	50%	1850	0.5	Historical fossil fuel sales (not considering colonies)	523.435	116.642	406.793
1678	ITA	Italy	developed	2	50%	1850	0.5	Historical fossil fuel sales (not considering colonies)	518.174	-348.621	866.796
1679	JAM	Jamaica	developing	2	50%	1850	0.5	Historical fossil fuel sales (not considering colonies)	524.902	-91.45	616.352
1680	JOR	Jordan	developing	2	50%	1850	0.5	Historical fossil fuel sales (not considering colonies)	524.744	400.253	124.49
1681	JPN	Japan	developed	2	50%	1850	0.5	Historical fossil fuel sales (not considering colonies)	522.031	-464.05	986.081
1682	KAZ	Kazakhstan	developing	2	50%	1850	0.5	Historical fossil fuel sales (not considering colonies)	447.711	-789.094	1236.81
1683	KEN	Kenya	developing	2	50%	1850	0.5	Historical fossil fuel sales (not considering colonies)	524.902	451.952	72.9507
1684	KGZ	Kyrgyz Republic	developing	2	50%	1850	0.5	Historical fossil fuel sales (not considering colonies)	524.614	254.862	269.752
1685	KHM	Cambodia	ldc	2	50%	1850	0.5	Historical fossil fuel sales (not considering colonies)	524.902	364.002	160.901
1686	KIR	Kiribati	ldc	2	50%	1850	0.5	Historical fossil fuel sales (not considering colonies)	524.902	491.902	33.0009
1687	KNA	St. Kitts and Nevis	developing	2	50%	1850	0.5	Historical fossil fuel sales (not considering colonies)	524.902	-66.5064	591.409
1688	KOR	South Korea	developed	2	50%	1850	0.5	Historical fossil fuel sales (not considering colonies)	523.609	-168.436	692.044
1689	KWT	Kuwait	developing	2	50%	1850	0.5	Historical fossil fuel sales (not considering colonies)	244.479	-1432.2	1676.68
1690	LAO	Laos	ldc	2	50%	1850	0.5	Historical fossil fuel sales (not considering colonies)	524.792	377.034	147.758
1691	LBN	Lebanon	developing	2	50%	1850	0.5	Historical fossil fuel sales (not considering colonies)	524.902	134.115	390.788
1692	LBR	Liberia	ldc	2	50%	1850	0.5	Historical fossil fuel sales (not considering colonies)	524.902	482.598	42.3043
1693	LBY	Libya	developing	2	50%	1850	0.5	Historical fossil fuel sales (not considering colonies)	244.479	-559.961	804.44
1694	LCA	St. Lucia	developing	2	50%	1850	0.5	Historical fossil fuel sales (not considering colonies)	524.902	284.56	240.342
1695	LIE	Liechtenstein	developed	2	50%	1850	0.5	Historical fossil fuel sales (not considering colonies)	524.902	-156.966	681.869
1696	LKA	Sri Lanka	developing	2	50%	1850	0.5	Historical fossil fuel sales (not considering colonies)	524.902	403.091	121.811
1697	LSO	Lesotho	ldc	2	50%	1850	0.5	Historical fossil fuel sales (not considering colonies)	524.902	366.931	157.972
1698	LTU	Lithuania	developed	2	50%	1850	0.5	Historical fossil fuel sales (not considering colonies)	523.476	-1193.83	1717.3
1699	LUX	Luxembourg	developed	2	50%	1850	0.5	Historical fossil fuel sales (not considering colonies)	524.902	-1336.93	1861.83
1700	LVA	Latvia	developed	2	50%	1850	0.5	Historical fossil fuel sales (not considering colonies)	524.902	-932.34	1457.24
1701	MAR	Morocco	developing	2	50%	1850	0.5	Historical fossil fuel sales (not considering colonies)	524.773	410.959	113.815
1702	MCO	Monaco	developed	2	50%	1850	0.5	Historical fossil fuel sales (not considering colonies)	524.902	102.761	422.141
1703	MDA	Moldova	developed	2	50%	1850	0.5	Historical fossil fuel sales (not considering colonies)	524.879	-495.279	1020.16
1704	MDG	Madagascar	ldc	2	50%	1850	0.5	Historical fossil fuel sales (not considering colonies)	524.902	449.698	75.2042
1705	MDV	Maldives	developing	2	50%	1850	0.5	Historical fossil fuel sales (not considering colonies)	524.902	442.98	81.9229
1706	MEX	Mexico	developing	2	50%	1850	0.5	Historical fossil fuel sales (not considering colonies)	487.723	152.99	334.734
1707	MHL	Marshall Islands	developing	2	50%	1850	0.5	Historical fossil fuel sales (not considering colonies)	524.902	263.42	261.483
1708	MKD	North Macedonia	developed	2	50%	1850	0.5	Historical fossil fuel sales (not considering colonies)	522.895	-230.613	753.508
1709	MLI	Mali	ldc	2	50%	1850	0.5	Historical fossil fuel sales (not considering colonies)	524.902	448.245	76.6577
1710	MLT	Malta	developed	2	50%	1850	0.5	Historical fossil fuel sales (not considering colonies)	524.902	134.232	390.67
1711	MMR	Myanmar	ldc	2	50%	1850	0.5	Historical fossil fuel sales (not considering colonies)	522.584	429.596	92.9881
1712	MNE	Montenegro	developed	2	50%	1850	0.5	Historical fossil fuel sales (not considering colonies)	523.67	-112.243	635.912
1713	MNG	Mongolia	developing	2	50%	1850	0.5	Historical fossil fuel sales (not considering colonies)	512.498	-218.965	731.463
1714	MOZ	Mozambique	ldc	2	50%	1850	0.5	Historical fossil fuel sales (not considering colonies)	524.534	461.297	63.2375
1715	MRT	Mauritania	ldc	2	50%	1850	0.5	Historical fossil fuel sales (not considering colonies)	524.146	415.472	108.674
1716	MUS	Mauritius	developing	2	50%	1850	0.5	Historical fossil fuel sales (not considering colonies)	524.902	152.923	371.979
1717	MWI	Malawi	ldc	2	50%	1850	0.5	Historical fossil fuel sales (not considering colonies)	524.898	497.331	27.5672
1718	MYS	Malaysia	developing	2	50%	1850	0.5	Historical fossil fuel sales (not considering colonies)	488.525	131.332	357.194
1719	NAM	Namibia	developing	2	50%	1850	0.5	Historical fossil fuel sales (not considering colonies)	524.902	110.055	414.848
1720	NER	Niger	ldc	2	50%	1850	0.5	Historical fossil fuel sales (not considering colonies)	524.807	492.227	32.5799
1721	NGA	Nigeria	developing	2	50%	1850	0.5	Historical fossil fuel sales (not considering colonies)	514.993	419.289	95.7035
1722	NIC	Nicaragua	developing	2	50%	1850	0.5	Historical fossil fuel sales (not considering colonies)	524.902	344.057	180.845
1723	NIU	Niue	developing	2	50%	1850	0.5	Historical fossil fuel sales (not considering colonies)	524.902	151.838	373.065
1724	NLD	Netherlands	developed	2	50%	1850	0.5	Historical fossil fuel sales (not considering colonies)	463.032	-946.638	1409.67
1725	NOR	Norway	developed	2	50%	1850	0.5	Historical fossil fuel sales (not considering colonies)	244.479	-812.64	1057.12
1726	NPL	Nepal	ldc	2	50%	1850	0.5	Historical fossil fuel sales (not considering colonies)	524.902	411.983	112.919
1727	NRU	Nauru	developing	2	50%	1850	0.5	Historical fossil fuel sales (not considering colonies)	524.902	278.799	246.104
1728	NZL	New Zealand	developed	2	50%	1850	0.5	Historical fossil fuel sales (not considering colonies)	501.942	-795.022	1296.96
1729	OMN	Oman	developing	2	50%	1850	0.5	Historical fossil fuel sales (not considering colonies)	304.897	-521.008	825.905
1730	PAK	Pakistan	developing	2	50%	1850	0.5	Historical fossil fuel sales (not considering colonies)	523.828	439.778	84.0497
1731	PAN	Panama	developing	2	50%	1850	0.5	Historical fossil fuel sales (not considering colonies)	524.902	319.583	205.32
1732	PER	Peru	developing	2	50%	1850	0.5	Historical fossil fuel sales (not considering colonies)	517.532	330.913	186.619
1733	PHL	Philippines	developing	2	50%	1850	0.5	Historical fossil fuel sales (not considering colonies)	524.558	437.081	87.4769
1734	PLW	Palau	developing	2	50%	1850	0.5	Historical fossil fuel sales (not considering colonies)	524.902	-2520.6	3045.5
1735	PNG	Papua New Guinea	developing	2	50%	1850	0.5	Historical fossil fuel sales (not considering colonies)	521.489	431.628	89.861
1736	POL	Poland	developed	2	50%	1850	0.5	Historical fossil fuel sales (not considering colonies)	493.041	-892.857	1385.9
1737	PRK	North Korea	developing	2	50%	1850	0.5	Historical fossil fuel sales (not considering colonies)	518.325	54.3478	463.977
1738	PRT	Portugal	developed	2	50%	1850	0.5	Historical fossil fuel sales (not considering colonies)	524.681	-131.04	655.722
1739	PRY	Paraguay	developing	2	50%	1850	0.5	Historical fossil fuel sales (not considering colonies)	524.902	46.0105	478.892
1740	QAT	Qatar	developing	2	50%	1850	0.5	Historical fossil fuel sales (not considering colonies)	244.479	-2447.59	2692.07
1741	ROU	Romania	developed	2	50%	1850	0.5	Historical fossil fuel sales (not considering colonies)	482.133	-490.012	972.146
1742	RUS	Russia	developed	2	50%	1850	0.5	Historical fossil fuel sales (not considering colonies)	377.917	-1384.98	1762.89
1743	RWA	Rwanda	ldc	2	50%	1850	0.5	Historical fossil fuel sales (not considering colonies)	524.902	495.481	29.4219
1744	SAU	Saudi Arabia	developing	2	50%	1850	0.5	Historical fossil fuel sales (not considering colonies)	244.479	-395.997	640.477
1745	SDN	Sudan	ldc	2	50%	1850	0.5	Historical fossil fuel sales (not considering colonies)	522.299	414.19	108.109
1746	SEN	Senegal	ldc	2	50%	1850	0.5	Historical fossil fuel sales (not considering colonies)	524.891	455.166	69.7248
1747	SGP	Singapore	developing	2	50%	1850	0.5	Historical fossil fuel sales (not considering colonies)	524.902	98.9796	425.923
1748	SLB	Solomon Islands	ldc	2	50%	1850	0.5	Historical fossil fuel sales (not considering colonies)	524.902	487.998	36.904
1749	SLE	Sierra Leone	ldc	2	50%	1850	0.5	Historical fossil fuel sales (not considering colonies)	524.902	472.634	52.2685
1750	SLV	El Salvador	developing	2	50%	1850	0.5	Historical fossil fuel sales (not considering colonies)	524.902	358.842	166.06
1751	SMR	San Marino	developed	2	50%	1850	0.5	Historical fossil fuel sales (not considering colonies)	524.902	-131.923	656.826
1752	SOM	Somalia	ldc	2	50%	1850	0.5	Historical fossil fuel sales (not considering colonies)	524.902	417.431	107.471
1753	SRB	Serbia	developed	2	50%	1850	0.5	Historical fossil fuel sales (not considering colonies)	515.645	-570.159	1085.8
1754	SSD	South Sudan	ldc	2	50%	1850	0.5	Historical fossil fuel sales (not considering colonies)	521.867	175.369	346.499
1755	STP	Sao Tome and Principe	ldc	2	50%	1850	0.5	Historical fossil fuel sales (not considering colonies)	524.902	483.228	41.6745
1756	SUR	Suriname	developing	2	50%	1850	0.5	Historical fossil fuel sales (not considering colonies)	505.379	20.6515	484.728
1757	SVK	Slovakia	developed	2	50%	1850	0.5	Historical fossil fuel sales (not considering colonies)	524.015	-763.699	1287.71
1758	SVN	Slovenia	developed	2	50%	1850	0.5	Historical fossil fuel sales (not considering colonies)	522.65	-397.47	920.12
1759	SWE	Sweden	developed	2	50%	1850	0.5	Historical fossil fuel sales (not considering colonies)	524.737	-290.769	815.505
1760	SWZ	Eswatini	developing	2	50%	1850	0.5	Historical fossil fuel sales (not considering colonies)	524.346	334.445	189.901
1761	SYC	Seychelles	developing	2	50%	1850	0.5	Historical fossil fuel sales (not considering colonies)	524.902	226.309	298.593
1762	SYR	Syria	developing	2	50%	1850	0.5	Historical fossil fuel sales (not considering colonies)	511.779	368.145	143.634
1763	TCA	Turks and Caicos Islands	developing	2	50%	1850	0.5	Historical fossil fuel sales (not considering colonies)	524.902	367.128	157.774
1764	TCD	Chad	ldc	2	50%	1850	0.5	Historical fossil fuel sales (not considering colonies)	521.962	446.242	75.7196
1765	TGO	Togo	ldc	2	50%	1850	0.5	Historical fossil fuel sales (not considering colonies)	524.902	453.777	71.1256
1766	THA	Thailand	developing	2	50%	1850	0.5	Historical fossil fuel sales (not considering colonies)	516.459	154.872	361.587
1767	TJK	Tajikistan	developing	2	50%	1850	0.5	Historical fossil fuel sales (not considering colonies)	524.824	393.767	131.057
1768	TKM	Turkmenistan	developing	2	50%	1850	0.5	Historical fossil fuel sales (not considering colonies)	419.102	-410.209	829.31
1769	TLS	Timor-Leste	ldc	2	50%	1850	0.5	Historical fossil fuel sales (not considering colonies)	480.113	303.078	177.036
1770	TON	Tonga	developing	2	50%	1850	0.5	Historical fossil fuel sales (not considering colonies)	524.902	326.772	198.13
1771	TTO	Trinidad and Tobago	developing	2	50%	1850	0.5	Historical fossil fuel sales (not considering colonies)	244.479	-2958.84	3203.32
1772	TUN	Tunisia	developing	2	50%	1850	0.5	Historical fossil fuel sales (not considering colonies)	513.274	304.582	208.691
1773	TUR	Türkiye	developing	2	50%	1850	0.5	Historical fossil fuel sales (not considering colonies)	522.685	267.088	255.596
1774	TUV	Tuvalu	ldc	2	50%	1850	0.5	Historical fossil fuel sales (not considering colonies)	524.902	367.065	157.837
1775	TZA	Tanzania	ldc	2	50%	1850	0.5	Historical fossil fuel sales (not considering colonies)	524.877	466.734	58.1426
1776	UGA	Uganda	ldc	2	50%	1850	0.5	Historical fossil fuel sales (not considering colonies)	524.902	479.498	45.4045
1777	UKR	Ukraine	developed	2	50%	1850	0.5	Historical fossil fuel sales (not considering colonies)	507.999	-1560.91	2068.91
1778	URY	Uruguay	developing	2	50%	1850	0.5	Historical fossil fuel sales (not considering colonies)	524.902	-795.914	1320.82
1779	USA	United States	developed	2	50%	1850	0.5	Historical fossil fuel sales (not considering colonies)	436.736	-1646.79	2083.52
1780	UZB	Uzbekistan	developing	2	50%	1850	0.5	Historical fossil fuel sales (not considering colonies)	509.944	76.0232	433.921
1781	VCT	St. Vincent and the Grenadines	developing	2	50%	1850	0.5	Historical fossil fuel sales (not considering colonies)	524.902	242.957	281.945
1782	VEN	Venezuela	developing	2	50%	1850	0.5	Historical fossil fuel sales (not considering colonies)	365.77	-163.832	529.603
1783	VGB	British Virgin Islands	developing	2	50%	1850	0.5	Historical fossil fuel sales (not considering colonies)	524.902	245.647	279.255
1784	VNM	Vietnam	developing	2	50%	1850	0.5	Historical fossil fuel sales (not considering colonies)	520.546	361.781	158.765
1785	VUT	Vanuatu	developing	2	50%	1850	0.5	Historical fossil fuel sales (not considering colonies)	524.902	375.447	149.455
1786	WSM	Samoa	developing	2	50%	1850	0.5	Historical fossil fuel sales (not considering colonies)	524.902	381.757	143.146
1787	YEM	Yemen	ldc	2	50%	1850	0.5	Historical fossil fuel sales (not considering colonies)	519.802	465.68	54.1216
1788	ZAF	South Africa	developing	2	50%	1850	0.5	Historical fossil fuel sales (not considering colonies)	511.475	-2.39277	513.867
1789	ZMB	Zambia	ldc	2	50%	1850	0.5	Historical fossil fuel sales (not considering colonies)	524.846	410.962	113.884
1790	ZWE	Zimbabwe	developing	2	50%	1850	0.5	Historical fossil fuel sales (not considering colonies)	523.877	391.337	132.541
1791	ABW	Aruba	developing	2	50%	1850	0.5	Historical fossil fuel sales (considering colonies)	526.633	-3747.97	4274.6
1792	AFG	Afghanistan	ldc	2	50%	1850	0.5	Historical fossil fuel sales (considering colonies)	526.353	487.798	38.5556
1793	AGO	Angola	ldc	2	50%	1850	0.5	Historical fossil fuel sales (considering colonies)	501.567	378.778	122.789
1794	AIA	Anguilla	developing	2	50%	1850	0.5	Historical fossil fuel sales (considering colonies)	526.633	47.313	479.32
1795	ALB	Albania	developed	2	50%	1850	0.5	Historical fossil fuel sales (considering colonies)	501.876	197.403	304.473
1796	AND	Andorra	developed	2	50%	1850	0.5	Historical fossil fuel sales (considering colonies)	526.633	19.1234	507.51
1797	ARE	United Arab Emirates	developing	2	50%	1850	0.5	Historical fossil fuel sales (considering colonies)	244.429	-687.348	931.777
1798	ARG	Argentina	developing	2	50%	1850	0.5	Historical fossil fuel sales (considering colonies)	493.746	-53.1992	546.946
1799	ARM	Armenia	developing	2	50%	1850	0.5	Historical fossil fuel sales (considering colonies)	526.633	-46.5013	573.135
1800	ATG	Antigua and Barbuda	developing	2	50%	1850	0.5	Historical fossil fuel sales (considering colonies)	526.633	25.5643	501.069
1801	AUS	Australia	developed	2	50%	1850	0.5	Historical fossil fuel sales (considering colonies)	434.884	-886.685	1321.57
1802	AUT	Austria	developed	2	50%	1850	0.5	Historical fossil fuel sales (considering colonies)	511.62	-550.047	1061.67
1803	AZE	Azerbaijan	developing	2	50%	1850	0.5	Historical fossil fuel sales (considering colonies)	434.126	-244.873	678.999
1804	BDI	Burundi	ldc	2	50%	1850	0.5	Historical fossil fuel sales (considering colonies)	526.633	506.495	20.1378
1805	BEL	Belgium	developed	2	50%	1850	0.5	Historical fossil fuel sales (considering colonies)	515.124	-1099.26	1614.39
1806	BEN	Benin	ldc	2	50%	1850	0.5	Historical fossil fuel sales (considering colonies)	526.535	481.815	44.7201
1807	BFA	Burkina Faso	ldc	2	50%	1850	0.5	Historical fossil fuel sales (considering colonies)	526.633	478.784	47.849
1808	BGD	Bangladesh	ldc	2	50%	1850	0.5	Historical fossil fuel sales (considering colonies)	525.793	480.625	45.1684
1809	BGR	Bulgaria	developed	2	50%	1850	0.5	Historical fossil fuel sales (considering colonies)	510.194	-931.904	1442.1
1810	BHR	Bahrain	developing	2	50%	1850	0.5	Historical fossil fuel sales (considering colonies)	399.823	-1765.28	2165.1
1811	BHS	Bahamas	developing	2	50%	1850	0.5	Historical fossil fuel sales (considering colonies)	526.633	-160.451	687.084
1812	BIH	Bosnia and Herzegovina	developed	2	50%	1850	0.5	Historical fossil fuel sales (considering colonies)	523.688	-479.145	1002.83
1813	BLR	Belarus	developed	2	50%	1850	0.5	Historical fossil fuel sales (considering colonies)	522.151	-728.058	1250.21
1814	BLZ	Belize	developing	2	50%	1850	0.5	Historical fossil fuel sales (considering colonies)	522.561	248.23	274.331
1815	BOL	Bolivia	developing	2	50%	1850	0.5	Historical fossil fuel sales (considering colonies)	514.707	333.737	180.97
1816	BRA	Brazil	developing	2	50%	1850	0.5	Historical fossil fuel sales (considering colonies)	514.059	139.509	374.55
1817	BRB	Barbados	developing	2	50%	1850	0.5	Historical fossil fuel sales (considering colonies)	518.463	-1262.87	1781.33
1818	BRN	Brunei Darussalam	developing	2	50%	1850	0.5	Historical fossil fuel sales (considering colonies)	244.429	-2028	2272.43
1819	BTN	Bhutan	ldc	2	50%	1850	0.5	Historical fossil fuel sales (considering colonies)	526.484	194.486	331.998
1820	BWA	Botswana	developing	2	50%	1850	0.5	Historical fossil fuel sales (considering colonies)	525.737	76.614	449.123
1821	CAF	Central African Republic	ldc	2	50%	1850	0.5	Historical fossil fuel sales (considering colonies)	526.633	276.95	249.683
1822	CAN	Canada	developed	2	50%	1850	0.5	Historical fossil fuel sales (considering colonies)	348.363	-1042.23	1390.59
1823	CHE	Switzerland	developed	2	50%	1850	0.5	Historical fossil fuel sales (considering colonies)	526.63	-81.5119	608.142
1824	CHL	Chile	developing	2	50%	1850	0.5	Historical fossil fuel sales (considering colonies)	522.341	206.014	316.327
1825	CHN	China	developing	2	50%	1850	0.5	Historical fossil fuel sales (considering colonies)	515.276	98.4573	416.819
1826	CIV	Cote d'Ivoire	developing	2	50%	1850	0.5	Historical fossil fuel sales (considering colonies)	525.499	478.433	47.0658
1827	CMR	Cameroon	developing	2	50%	1850	0.5	Historical fossil fuel sales (considering colonies)	523.543	451.836	71.7074
1828	COD	DR Congo	ldc	2	50%	1850	0.5	Historical fossil fuel sales (considering colonies)	526.442	492.283	34.1587
1829	COG	Congo Republic	developing	2	50%	1850	0.5	Historical fossil fuel sales (considering colonies)	489.759	278.623	211.136
1830	COK	Cook Islands	developing	2	50%	1850	0.5	Historical fossil fuel sales (considering colonies)	526.633	157.945	368.688
1831	COL	Colombia	developing	2	50%	1850	0.5	Historical fossil fuel sales (considering colonies)	500.693	291.67	209.023
1832	COM	Comoros	ldc	2	50%	1850	0.5	Historical fossil fuel sales (considering colonies)	526.633	454.815	71.8179
1833	CPV	Cabo Verde	developing	2	50%	1850	0.5	Historical fossil fuel sales (considering colonies)	526.633	451.928	74.7056
1834	CRI	Costa Rica	developing	2	50%	1850	0.5	Historical fossil fuel sales (considering colonies)	526.633	316.025	210.609
1835	CUB	Cuba	developing	2	50%	1850	0.5	Historical fossil fuel sales (considering colonies)	519.528	53.2708	466.257
1836	CYP	Cyprus	developed	2	50%	1850	0.5	Historical fossil fuel sales (considering colonies)	526.633	68.5561	458.077
1837	CZE	Czech Republic	developed	2	50%	1850	0.5	Historical fossil fuel sales (considering colonies)	507.32	-1178.16	1685.48
1838	DEU	Germany	developed	2	50%	1850	0.5	Historical fossil fuel sales (considering colonies)	498.572	-1390.6	1889.17
1839	DJI	Djibouti	ldc	2	50%	1850	0.5	Historical fossil fuel sales (considering colonies)	526.633	396.988	129.645
1840	DMA	Dominica	developing	2	50%	1850	0.5	Historical fossil fuel sales (considering colonies)	526.633	264.376	262.258
1841	DNK	Denmark	developed	2	50%	1850	0.5	Historical fossil fuel sales (considering colonies)	468.541	-756.889	1225.43
1842	DOM	Dominican Republic	developing	2	50%	1850	0.5	Historical fossil fuel sales (considering colonies)	526.633	341.312	185.321
1843	DZA	Algeria	developing	2	50%	1850	0.5	Historical fossil fuel sales (considering colonies)	467.814	216.819	250.995
1844	ECU	Ecuador	developing	2	50%	1850	0.5	Historical fossil fuel sales (considering colonies)	490.266	262.908	227.358
1845	EGY	Egypt	developing	2	50%	1850	0.5	Historical fossil fuel sales (considering colonies)	515.622	413.07	102.552
1846	ERI	Eritrea	ldc	2	50%	1850	0.5	Historical fossil fuel sales (considering colonies)	526.633	402.69	123.943
1847	ESP	Spain	developed	2	50%	1850	0.5	Historical fossil fuel sales (considering colonies)	523.039	-125.767	648.806
1848	EST	Estonia	developed	2	50%	1850	0.5	Historical fossil fuel sales (considering colonies)	526.633	-2229.57	2756.2
1849	ETH	Ethiopia	ldc	2	50%	1850	0.5	Historical fossil fuel sales (considering colonies)	526.633	479.264	47.3696
1850	FIN	Finland	developed	2	50%	1850	0.5	Historical fossil fuel sales (considering colonies)	526.633	-672.009	1198.64
1851	FJI	Fiji	developing	2	50%	1850	0.5	Historical fossil fuel sales (considering colonies)	526.633	275.883	250.75
1852	FRA	France	developed	2	50%	1850	0.5	Historical fossil fuel sales (considering colonies)	519.892	-525.001	1044.89
1853	FSM	Micronesia, Fed. Sts.	developing	2	50%	1850	0.5	Historical fossil fuel sales (considering colonies)	526.633	416.713	109.921
1854	GAB	Gabon	developing	2	50%	1850	0.5	Historical fossil fuel sales (considering colonies)	409.407	-145.069	554.476
1855	GBR	United Kingdom	developed	2	50%	1850	0.5	Historical fossil fuel sales (considering colonies)	444.947	-1288.63	1733.58
1856	GEO	Georgia	developing	2	50%	1850	0.5	Historical fossil fuel sales (considering colonies)	526.099	-522.778	1048.88
1857	GHA	Ghana	developing	2	50%	1850	0.5	Historical fossil fuel sales (considering colonies)	525.825	476.845	48.9796
1858	GIN	Guinea	ldc	2	50%	1850	0.5	Historical fossil fuel sales (considering colonies)	526.633	426.91	99.7229
1859	GMB	Gambia	ldc	2	50%	1850	0.5	Historical fossil fuel sales (considering colonies)	526.633	474.782	51.8508
1860	GNB	Guinea-Bissau	ldc	2	50%	1850	0.5	Historical fossil fuel sales (considering colonies)	526.633	427.281	99.3519
1861	GNQ	Equatorial Guinea	developing	2	50%	1850	0.5	Historical fossil fuel sales (considering colonies)	417.329	-29.1091	446.438
1862	GRC	Greece	developed	2	50%	1850	0.5	Historical fossil fuel sales (considering colonies)	519.312	-387.296	906.608
1863	GRD	Grenada	developing	2	50%	1850	0.5	Historical fossil fuel sales (considering colonies)	526.633	350.64	175.993
1864	GTM	Guatemala	developing	2	50%	1850	0.5	Historical fossil fuel sales (considering colonies)	525.912	425.707	100.205
1865	GUY	Guyana	developing	2	50%	1850	0.5	Historical fossil fuel sales (considering colonies)	526.633	-14.7606	541.394
1866	HND	Honduras	developing	2	50%	1850	0.5	Historical fossil fuel sales (considering colonies)	526.633	439.556	87.0776
1867	HRV	Croatia	developed	2	50%	1850	0.5	Historical fossil fuel sales (considering colonies)	514.478	-282.819	797.297
1868	HTI	Haiti	ldc	2	50%	1850	0.5	Historical fossil fuel sales (considering colonies)	526.633	443.239	83.3943
1869	HUN	Hungary	developed	2	50%	1850	0.5	Historical fossil fuel sales (considering colonies)	500.956	-503.681	1004.64
1870	IDN	Indonesia	developing	2	50%	1850	0.5	Historical fossil fuel sales (considering colonies)	513.79	357.116	156.673
1871	IND	India	developing	2	50%	1850	0.5	Historical fossil fuel sales (considering colonies)	524.886	430.161	94.7255
1872	IRL	Ireland	developed	2	50%	1850	0.5	Historical fossil fuel sales (considering colonies)	523.134	-601.84	1124.97
1873	IRN	Iran	developing	2	50%	1850	0.5	Historical fossil fuel sales (considering colonies)	439.515	-39.0165	478.531
1874	IRQ	Iraq	developing	2	50%	1850	0.5	Historical fossil fuel sales (considering colonies)	460.502	234.332	226.17
1875	ISL	Iceland	developed	2	50%	1850	0.5	Historical fossil fuel sales (considering colonies)	526.633	-625.625	1152.26
1876	ISR	Israel	developed	2	50%	1850	0.5	Historical fossil fuel sales (considering colonies)	525.008	118.215	406.793
1877	ITA	Italy	developed	2	50%	1850	0.5	Historical fossil fuel sales (considering colonies)	519.18	-347.616	866.796
1878	JAM	Jamaica	developing	2	50%	1850	0.5	Historical fossil fuel sales (considering colonies)	526.633	-89.7191	616.352
1879	JOR	Jordan	developing	2	50%	1850	0.5	Historical fossil fuel sales (considering colonies)	526.457	401.967	124.49
1880	JPN	Japan	developed	2	50%	1850	0.5	Historical fossil fuel sales (considering colonies)	523.452	-462.629	986.081
1881	KAZ	Kazakhstan	developing	2	50%	1850	0.5	Historical fossil fuel sales (considering colonies)	441.117	-795.688	1236.81
1882	KEN	Kenya	developing	2	50%	1850	0.5	Historical fossil fuel sales (considering colonies)	526.633	453.683	72.9507
1883	KGZ	Kyrgyz Republic	developing	2	50%	1850	0.5	Historical fossil fuel sales (considering colonies)	526.314	256.562	269.752
1884	KHM	Cambodia	ldc	2	50%	1850	0.5	Historical fossil fuel sales (considering colonies)	526.633	365.732	160.901
1885	KIR	Kiribati	ldc	2	50%	1850	0.5	Historical fossil fuel sales (considering colonies)	526.633	493.632	33.0009
1886	KNA	St. Kitts and Nevis	developing	2	50%	1850	0.5	Historical fossil fuel sales (considering colonies)	526.633	-64.7756	591.409
1887	KOR	South Korea	developed	2	50%	1850	0.5	Historical fossil fuel sales (considering colonies)	525.2	-166.844	692.044
1888	KWT	Kuwait	developing	2	50%	1850	0.5	Historical fossil fuel sales (considering colonies)	244.429	-1432.25	1676.68
1889	LAO	Laos	ldc	2	50%	1850	0.5	Historical fossil fuel sales (considering colonies)	526.511	378.753	147.758
1890	LBN	Lebanon	developing	2	50%	1850	0.5	Historical fossil fuel sales (considering colonies)	526.633	135.846	390.788
1891	LBR	Liberia	ldc	2	50%	1850	0.5	Historical fossil fuel sales (considering colonies)	526.633	484.329	42.3043
1892	LBY	Libya	developing	2	50%	1850	0.5	Historical fossil fuel sales (considering colonies)	244.429	-560.011	804.44
1893	LCA	St. Lucia	developing	2	50%	1850	0.5	Historical fossil fuel sales (considering colonies)	526.633	286.291	240.342
1894	LIE	Liechtenstein	developed	2	50%	1850	0.5	Historical fossil fuel sales (considering colonies)	526.633	-155.235	681.869
1895	LKA	Sri Lanka	developing	2	50%	1850	0.5	Historical fossil fuel sales (considering colonies)	526.633	404.822	121.811
1896	LSO	Lesotho	ldc	2	50%	1850	0.5	Historical fossil fuel sales (considering colonies)	526.633	368.661	157.972
1897	LTU	Lithuania	developed	2	50%	1850	0.5	Historical fossil fuel sales (considering colonies)	525.053	-1192.25	1717.3
1898	LUX	Luxembourg	developed	2	50%	1850	0.5	Historical fossil fuel sales (considering colonies)	526.633	-1335.2	1861.83
1899	LVA	Latvia	developed	2	50%	1850	0.5	Historical fossil fuel sales (considering colonies)	526.633	-930.609	1457.24
1900	MAR	Morocco	developing	2	50%	1850	0.5	Historical fossil fuel sales (considering colonies)	526.548	412.734	113.815
1901	MCO	Monaco	developed	2	50%	1850	0.5	Historical fossil fuel sales (considering colonies)	526.633	104.492	422.141
1902	MDA	Moldova	developed	2	50%	1850	0.5	Historical fossil fuel sales (considering colonies)	526.607	-493.551	1020.16
1903	MDG	Madagascar	ldc	2	50%	1850	0.5	Historical fossil fuel sales (considering colonies)	526.633	451.429	75.2042
1904	MDV	Maldives	developing	2	50%	1850	0.5	Historical fossil fuel sales (considering colonies)	526.633	444.71	81.9229
1905	MEX	Mexico	developing	2	50%	1850	0.5	Historical fossil fuel sales (considering colonies)	485.445	150.711	334.734
1906	MHL	Marshall Islands	developing	2	50%	1850	0.5	Historical fossil fuel sales (considering colonies)	526.633	265.151	261.483
1907	MKD	North Macedonia	developed	2	50%	1850	0.5	Historical fossil fuel sales (considering colonies)	524.409	-229.098	753.508
1908	MLI	Mali	ldc	2	50%	1850	0.5	Historical fossil fuel sales (considering colonies)	526.633	449.976	76.6577
1909	MLT	Malta	developed	2	50%	1850	0.5	Historical fossil fuel sales (considering colonies)	526.633	135.963	390.67
1910	MMR	Myanmar	ldc	2	50%	1850	0.5	Historical fossil fuel sales (considering colonies)	524.123	431.135	92.9881
1911	MNE	Montenegro	developed	2	50%	1850	0.5	Historical fossil fuel sales (considering colonies)	525.268	-110.645	635.912
1912	MNG	Mongolia	developing	2	50%	1850	0.5	Historical fossil fuel sales (considering colonies)	512.891	-218.572	731.463
1913	MOZ	Mozambique	ldc	2	50%	1850	0.5	Historical fossil fuel sales (considering colonies)	526.235	462.998	63.2375
1914	MRT	Mauritania	ldc	2	50%	1850	0.5	Historical fossil fuel sales (considering colonies)	525.796	417.121	108.674
1915	MUS	Mauritius	developing	2	50%	1850	0.5	Historical fossil fuel sales (considering colonies)	526.633	154.654	371.979
1916	MWI	Malawi	ldc	2	50%	1850	0.5	Historical fossil fuel sales (considering colonies)	526.628	499.061	27.5672
1917	MYS	Malaysia	developing	2	50%	1850	0.5	Historical fossil fuel sales (considering colonies)	486.428	129.234	357.194
1918	NAM	Namibia	developing	2	50%	1850	0.5	Historical fossil fuel sales (considering colonies)	526.633	111.785	414.848
1919	NER	Niger	ldc	2	50%	1850	0.5	Historical fossil fuel sales (considering colonies)	526.527	493.947	32.5799
1920	NGA	Nigeria	developing	2	50%	1850	0.5	Historical fossil fuel sales (considering colonies)	515.661	419.957	95.7035
1921	NIC	Nicaragua	developing	2	50%	1850	0.5	Historical fossil fuel sales (considering colonies)	526.633	345.788	180.845
1922	NIU	Niue	developing	2	50%	1850	0.5	Historical fossil fuel sales (considering colonies)	526.633	153.568	373.065
1923	NLD	Netherlands	developed	2	50%	1850	0.5	Historical fossil fuel sales (considering colonies)	455.278	-954.391	1409.67
1924	NOR	Norway	developed	2	50%	1850	0.5	Historical fossil fuel sales (considering colonies)	244.429	-812.69	1057.12
1925	NPL	Nepal	ldc	2	50%	1850	0.5	Historical fossil fuel sales (considering colonies)	526.633	413.714	112.919
1926	NRU	Nauru	developing	2	50%	1850	0.5	Historical fossil fuel sales (considering colonies)	526.633	280.53	246.104
1927	NZL	New Zealand	developed	2	50%	1850	0.5	Historical fossil fuel sales (considering colonies)	501.351	-795.613	1296.96
1928	OMN	Oman	developing	2	50%	1850	0.5	Historical fossil fuel sales (considering colonies)	282.901	-543.003	825.905
1929	PAK	Pakistan	developing	2	50%	1850	0.5	Historical fossil fuel sales (considering colonies)	525.443	441.393	84.0497
1930	PAN	Panama	developing	2	50%	1850	0.5	Historical fossil fuel sales (considering colonies)	526.633	321.314	205.32
1931	PER	Peru	developing	2	50%	1850	0.5	Historical fossil fuel sales (considering colonies)	518.468	331.849	186.619
1932	PHL	Philippines	developing	2	50%	1850	0.5	Historical fossil fuel sales (considering colonies)	526.252	438.775	87.4769
1933	PLW	Palau	developing	2	50%	1850	0.5	Historical fossil fuel sales (considering colonies)	526.633	-2518.87	3045.5
1934	PNG	Papua New Guinea	developing	2	50%	1850	0.5	Historical fossil fuel sales (considering colonies)	522.852	432.991	89.861
1935	POL	Poland	developed	2	50%	1850	0.5	Historical fossil fuel sales (considering colonies)	491.336	-894.562	1385.9
1936	PRK	North Korea	developing	2	50%	1850	0.5	Historical fossil fuel sales (considering colonies)	519.346	55.3692	463.977
1937	PRT	Portugal	developed	2	50%	1850	0.5	Historical fossil fuel sales (considering colonies)	524.894	-130.828	655.722
1938	PRY	Paraguay	developing	2	50%	1850	0.5	Historical fossil fuel sales (considering colonies)	526.633	47.7413	478.892
1939	QAT	Qatar	developing	2	50%	1850	0.5	Historical fossil fuel sales (considering colonies)	244.429	-2447.64	2692.07
1940	ROU	Romania	developed	2	50%	1850	0.5	Historical fossil fuel sales (considering colonies)	479.252	-492.894	972.146
1941	RUS	Russia	developed	2	50%	1850	0.5	Historical fossil fuel sales (considering colonies)	363.796	-1399.1	1762.89
1942	RWA	Rwanda	ldc	2	50%	1850	0.5	Historical fossil fuel sales (considering colonies)	526.633	497.211	29.4219
1943	SAU	Saudi Arabia	developing	2	50%	1850	0.5	Historical fossil fuel sales (considering colonies)	244.429	-396.047	640.477
1944	SDN	Sudan	ldc	2	50%	1850	0.5	Historical fossil fuel sales (considering colonies)	523.749	415.64	108.109
1945	SEN	Senegal	ldc	2	50%	1850	0.5	Historical fossil fuel sales (considering colonies)	526.62	456.895	69.7248
1946	SGP	Singapore	developing	2	50%	1850	0.5	Historical fossil fuel sales (considering colonies)	526.633	100.71	425.923
1947	SLB	Solomon Islands	ldc	2	50%	1850	0.5	Historical fossil fuel sales (considering colonies)	526.633	489.729	36.904
1948	SLE	Sierra Leone	ldc	2	50%	1850	0.5	Historical fossil fuel sales (considering colonies)	526.633	474.365	52.2685
1949	SLV	El Salvador	developing	2	50%	1850	0.5	Historical fossil fuel sales (considering colonies)	526.633	360.573	166.06
1950	SMR	San Marino	developed	2	50%	1850	0.5	Historical fossil fuel sales (considering colonies)	526.633	-130.192	656.826
1951	SOM	Somalia	ldc	2	50%	1850	0.5	Historical fossil fuel sales (considering colonies)	526.633	419.162	107.471
1952	SRB	Serbia	developed	2	50%	1850	0.5	Historical fossil fuel sales (considering colonies)	516.378	-569.427	1085.8
1953	SSD	South Sudan	ldc	2	50%	1850	0.5	Historical fossil fuel sales (considering colonies)	523.271	176.772	346.499
1954	STP	Sao Tome and Principe	ldc	2	50%	1850	0.5	Historical fossil fuel sales (considering colonies)	526.633	484.959	41.6745
1955	SUR	Suriname	developing	2	50%	1850	0.5	Historical fossil fuel sales (considering colonies)	505.005	20.2769	484.728
1956	SVK	Slovakia	developed	2	50%	1850	0.5	Historical fossil fuel sales (considering colonies)	525.651	-762.064	1287.71
1957	SVN	Slovenia	developed	2	50%	1850	0.5	Historical fossil fuel sales (considering colonies)	524.138	-395.982	920.12
1958	SWE	Sweden	developed	2	50%	1850	0.5	Historical fossil fuel sales (considering colonies)	526.45	-289.055	815.505
1959	SWZ	Eswatini	developing	2	50%	1850	0.5	Historical fossil fuel sales (considering colonies)	526.03	336.129	189.901
1960	SYC	Seychelles	developing	2	50%	1850	0.5	Historical fossil fuel sales (considering colonies)	526.633	228.04	298.593
1961	SYR	Syria	developing	2	50%	1850	0.5	Historical fossil fuel sales (considering colonies)	512.094	368.461	143.634
1962	TCA	Turks and Caicos Islands	developing	2	50%	1850	0.5	Historical fossil fuel sales (considering colonies)	526.633	368.859	157.774
1963	TCD	Chad	ldc	2	50%	1850	0.5	Historical fossil fuel sales (considering colonies)	523.376	447.656	75.7196
1964	TGO	Togo	ldc	2	50%	1850	0.5	Historical fossil fuel sales (considering colonies)	526.633	455.508	71.1256
1965	THA	Thailand	developing	2	50%	1850	0.5	Historical fossil fuel sales (considering colonies)	517.279	155.692	361.587
1966	TJK	Tajikistan	developing	2	50%	1850	0.5	Historical fossil fuel sales (considering colonies)	526.546	395.489	131.057
1967	TKM	Turkmenistan	developing	2	50%	1850	0.5	Historical fossil fuel sales (considering colonies)	409.422	-419.888	829.31
1968	TLS	Timor-Leste	ldc	2	50%	1850	0.5	Historical fossil fuel sales (considering colonies)	477.014	299.978	177.036
1969	TON	Tonga	developing	2	50%	1850	0.5	Historical fossil fuel sales (considering colonies)	526.633	328.503	198.13
1970	TTO	Trinidad and Tobago	developing	2	50%	1850	0.5	Historical fossil fuel sales (considering colonies)	244.429	-2958.89	3203.32
1971	TUN	Tunisia	developing	2	50%	1850	0.5	Historical fossil fuel sales (considering colonies)	513.753	305.062	208.691
1972	TUR	Türkiye	developing	2	50%	1850	0.5	Historical fossil fuel sales (considering colonies)	524.177	268.58	255.596
1973	TUV	Tuvalu	ldc	2	50%	1850	0.5	Historical fossil fuel sales (considering colonies)	526.633	368.796	157.837
1974	TZA	Tanzania	ldc	2	50%	1850	0.5	Historical fossil fuel sales (considering colonies)	526.605	468.462	58.1426
1975	UGA	Uganda	ldc	2	50%	1850	0.5	Historical fossil fuel sales (considering colonies)	526.633	481.229	45.4045
1976	UKR	Ukraine	developed	2	50%	1850	0.5	Historical fossil fuel sales (considering colonies)	507.907	-1561	2068.91
1977	URY	Uruguay	developing	2	50%	1850	0.5	Historical fossil fuel sales (considering colonies)	526.633	-794.183	1320.82
1978	USA	United States	developed	2	50%	1850	0.5	Historical fossil fuel sales (considering colonies)	428.958	-1654.57	2083.52
1979	UZB	Uzbekistan	developing	2	50%	1850	0.5	Historical fossil fuel sales (considering colonies)	510.062	76.1408	433.921
1980	VCT	St. Vincent and the Grenadines	developing	2	50%	1850	0.5	Historical fossil fuel sales (considering colonies)	526.633	244.688	281.945
1981	VEN	Venezuela	developing	2	50%	1850	0.5	Historical fossil fuel sales (considering colonies)	350.34	-179.263	529.603
1982	VGB	British Virgin Islands	developing	2	50%	1850	0.5	Historical fossil fuel sales (considering colonies)	526.633	247.378	279.255
1983	VNM	Vietnam	developing	2	50%	1850	0.5	Historical fossil fuel sales (considering colonies)	521.843	363.077	158.765
1984	VUT	Vanuatu	developing	2	50%	1850	0.5	Historical fossil fuel sales (considering colonies)	526.633	377.178	149.455
1985	WSM	Samoa	developing	2	50%	1850	0.5	Historical fossil fuel sales (considering colonies)	526.633	383.488	143.146
1986	YEM	Yemen	ldc	2	50%	1850	0.5	Historical fossil fuel sales (considering colonies)	520.983	466.861	54.1216
1987	ZAF	South Africa	developing	2	50%	1850	0.5	Historical fossil fuel sales (considering colonies)	511.804	-2.06308	513.867
1988	ZMB	Zambia	ldc	2	50%	1850	0.5	Historical fossil fuel sales (considering colonies)	526.571	412.687	113.884
1989	ZWE	Zimbabwe	developing	2	50%	1850	0.5	Historical fossil fuel sales (considering colonies)	525.9	393.359	132.541
1990	ABW	Aruba	developing	2	50%	1850	0.5	GDP per capita (MER)	362.473	-3912.13	4274.6
1991	AFG	Afghanistan	ldc	2	50%	1850	0.5	GDP per capita (MER)	556.207	517.652	38.5556
1992	AGO	Angola	ldc	2	50%	1850	0.5	GDP per capita (MER)	551.272	428.484	122.789
1993	AIA	Anguilla	developing	2	50%	1850	0.5	GDP per capita (MER)	510.972	31.652	479.32
1994	ALB	Albania	developed	2	50%	1850	0.5	GDP per capita (MER)	526.026	221.553	304.473
1995	AND	Andorra	developed	2	50%	1850	0.5	GDP per capita (MER)	351.506	-156.004	507.51
1996	ARE	United Arab Emirates	developing	2	50%	1850	0.5	GDP per capita (MER)	359.336	-572.441	931.777
1997	ARG	Argentina	developing	2	50%	1850	0.5	GDP per capita (MER)	494.829	-52.1168	546.946
1998	ARM	Armenia	developing	2	50%	1850	0.5	GDP per capita (MER)	529.584	-43.5507	573.135
[truncated: 10,737 more rows]
