# Supplementary material for: A justice-based framework to determine countries’ fair warming contributions to Paris Agreement
Source: Research Square preprint supplement (doi:10.21203/rs.3.rs-4129114/v1), 2024-03-29
Supplement: Supplementary file 2 [file cfc90586e4cb152ef467d08a.xlsx]

## Sheet: Sheet1
	ISO3	Country	Country group	Population in 2050 (thousands)	Remaining CO2-we budgets per capita (2021-2050)(tCO2-we) | indicator as equal per capita	Remaining CO2-we budgets per capita (2021-2050)(tCO2-we) | indicator as 10-year bond yield	Remaining CO2-we budgets per capita (2021-2050)(tCO2-we) | indicator as GDP per capita (PPP)	Remaining CO2-we budgets per capita (2021-2050)(tCO2-we) | indicator as historical fossil fuel sales
0	ABW	Aruba	developing	94.185	-3865.59	-3853.23	-4017.14	-3849.7
1	AFG	Afghanistan	ldc	74075.2	370.457	499.796	434.703	386.117
2	AGO	Angola	ldc	72328.1	286.224	313.646	340.477	281.886
3	AIA	Anguilla	developing	15.294	-70.3078	-57.9503	-76.1603	-54.4215
4	ALB	Albania	developed	2456.47	104.54	40.0632	90.4961	100.451
5	AND	Andorra	developed	80.504	-98.4973	-196.582	-237.901	-82.611
6	ARE	United Arab Emirates	developing	11449.5	-522.765	-510.407	-739.722	-734.566
7	ARG	Argentina	developing	51621.2	-137.933	-125.576	-165.136	-148.581
8	ARM	Armenia	developing	2573.47	-164.122	-151.765	-172.765	-148.236
9	ATG	Antigua and Barbuda	developing	99.03	-92.0565	-79.6989	-113.752	-76.1702
10	AUS	Australia	developed	32192.9	-912.557	-1028.86	-1047.47	-970.696
11	AUT	Austria	developed	8924.19	-652.655	-786.966	-856.343	-648.881
12	AZE	Azerbaijan	developing	10867.3	-269.986	-257.629	-268.976	-328.737
13	BDI	Burundi	ldc	24208.7	388.875	518.214	455.398	404.761
14	BEL	Belgium	developed	12090.7	-1205.38	-1339.09	-1396.23	-1198.78
15	BEN	Benin	ldc	25264	364.292	493.631	424.097	380.099
16	BFA	Burkina Faso	ldc	40541.5	361.164	490.503	423.571	377.05
17	BGD	Bangladesh	ldc	203905	363.844	365.463	407.639	379.053
18	BGR	Bulgaria	developed	5187.39	-1033.09	-1120.26	-1134.4	-1030.46
19	BHR	Bahrain	developing	1809.24	-1756.09	-1820.85	-1887.53	-1842.52
20	BHS	Bahamas	developing	450.625	-278.072	-265.714	-346.506	-262.185
21	BIH	Bosnia and Herzegovina	developed	2739.01	-593.821	-691.905	-620.56	-580.311
22	BLR	Belarus	developed	8409.63	-841.196	-939.281	-882.573	-828.926
23	BLZ	Belize	developing	538.838	134.681	147.039	170.493	147.283
24	BOL	Bolivia	developing	16609.9	228.042	240.4	267.103	234.306
25	BRA	Brazil	developing	230886	34.4622	152.473	35.058	40.2034
26	BRB	Barbados	developing	267.788	-1372.32	-1359.96	-1376.21	-1363.02
27	BRN	Brunei Darussalam	developing	498.373	-1863.41	-1851.06	-2063.83	-2075.21
28	BTN	Bhutan	ldc	874.294	77.0142	206.353	96.8462	92.78
29	BWA	Botswana	developing	3679.34	-40.1103	-69.4867	-23.9826	-24.9473
30	CAF	Central African Republic	ldc	11533.4	159.329	288.668	225.699	175.215
31	CAN	Canada	developed	45890.8	-981.58	-1111.82	-1113.54	-1109.53
32	CHE	Switzerland	developed	9753.75	-199.129	-384.057	-416.259	-183.246
33	CHL	Chile	developing	20675.4	92.6856	27.9488	39.2432	105.109
34	CHN	China	developing	1.34294e+06	-7.80622	-150.701	-33.8765	-1.08322
35	CIV	Cote d'Ivoire	developing	51358.2	361.947	374.304	416.047	376.917
36	CMR	Cameroon	developing	51279.6	337.305	349.663	395.839	350.698
37	COD	DR Congo	ldc	217494	374.854	504.193	440.838	390.586
38	COG	Congo Republic	developing	10378.9	197.876	210.234	257.131	184.012
39	COK	Cook Islands	developing	17.674	40.3241	52.6816	34.4715	56.2104
40	COL	Colombia	developing	56987.7	199.989	313.495	198.765	194.946
41	COM	Comoros	ldc	1246.21	337.195	466.534	394.899	353.081
42	CPV	Cabo Verde	developing	727.457	334.307	346.664	377.942	350.193
43	CRI	Costa Rica	developing	5702.52	198.404	210.761	173.697	214.29
44	CUB	Cuba	developing	10028.1	-57.2447	-44.8871	-63.0972	-47.0911
45	CYP	Cyprus	developed	1391.79	-49.0647	-158.703	-111.472	-33.1784
46	CZE	Czech Republic	developed	10577.1	-1276.47	-1366.55	-1414.82	-1276.16
47	DEU	Germany	developed	78932.2	-1480.16	-1631.79	-1691.48	-1486.92
48	DJI	Djibouti	ldc	1502.58	279.367	408.706	329.636	295.254
49	DMA	Dominica	developing	74.167	146.755	159.112	161.982	162.641
50	DNK	Denmark	developed	6558.55	-816.418	-961.573	-1011.02	-847.402
51	DOM	Dominican Republic	developing	13180.5	223.692	236.049	213.456	239.578
52	DZA	Algeria	developing	60001.1	158.017	170.375	185.711	126.447
53	ECU	Ecuador	developing	22269.8	181.654	194.012	207.357	168.199
54	EGY	Egypt	developing	160340	306.461	524.846	335.389	313.463
55	ERI	Eritrea	ldc	5964.02	285.07	414.409	343.384	300.956
56	ESP	Spain	developed	44219.6	-239.793	-363.221	-369.618	-226.807
57	EST	Estonia	developed	1171.69	-2347.19	-2445.27	-2498.03	-2331.3
58	ETH	Ethiopia	ldc	214812	361.643	317.205	423.499	377.529
59	FIN	Finland	developed	5460.92	-789.63	-926.504	-976.31	-773.743
60	FJI	Fiji	developing	1094.17	158.262	170.62	182.827	174.148
61	FRA	France	developed	69632.2	-635.88	-774.73	-793.442	-625.433
62	FSM	Micronesia, Fed. Sts.	developing	135.457	299.092	311.449	353.594	314.978
63	GAB	Gabon	developing	3757.05	-145.464	-133.106	-120.169	-224.158
64	GBR	United Kingdom	developed	72114.8	-1324.57	-1442.77	-1472.87	-1374.59
65	GEO	Georgia	developing	3384.66	-639.864	-627.507	-656.391	-624.409
66	GHA	Ghana	developing	52231.8	360.033	372.39	411.295	375.267
67	GIN	Guinea	ldc	23711.7	309.29	438.629	370.104	325.176
68	GMB	Gambia	ldc	4673.74	357.162	486.501	419.646	373.048
69	GNB	Guinea-Bissau	ldc	3445.29	309.661	439	372.533	325.547
70	GNQ	Equatorial Guinea	developing	2790.53	-37.4254	-25.0678	-11.9566	-109.728
71	GRC	Greece	developed	9144.95	-497.596	-600.711	-596.058	-487.616
72	GRD	Grenada	developing	136.253	233.019	245.377	238.753	248.906
73	GTM	Guatemala	developing	24600.7	308.808	321.165	346.105	324.112
74	GUY	Guyana	developing	878.746	-132.381	-120.024	-164.442	-116.495
75	HND	Honduras	developing	14258.5	321.935	334.292	370.195	337.821
76	HRV	Croatia	developed	3333.43	-388.285	-502.369	-503.853	-382.205
77	HTI	Haiti	ldc	15087.5	325.618	454.957	383.077	341.505
78	HUN	Hungary	developed	8817.4	-595.625	-588.187	-711.611	-600.456
79	IDN	Indonesia	developing	317225	252.339	215.402	269.505	257.863
80	IND	India	developing	1.67049e+06	314.287	290.99	354.855	328.764
81	IRL	Ireland	developed	5724.69	-715.962	-854.318	-933.091	-702.898
82	IRN	Iran	developing	99007.2	-69.5188	107.238	-67.8184	-123.922
83	IRQ	Iraq	developing	74515.1	182.843	140.329	225.004	145.373
84	ISL	Iceland	developed	408.783	-743.246	-768.224	-915.411	-727.359
85	ISR	Israel	developed	12991.8	2.21992	-109.842	-72.0199	16.7945
86	ITA	Italy	developed	52250.5	-457.783	-559.373	-628.292	-447.911
87	JAM	Jamaica	developing	2493.82	-207.34	-194.982	-193.417	-191.454
88	JOR	Jordan	developing	15005.9	284.522	150.813	318.6	300.266
89	JPN	Japan	developed	103784	-577.069	-776.949	-741.066	-563.749
90	KAZ	Kazakhstan	developing	25610	-827.793	-713.9	-856.342	-880.903
91	KEN	Kenya	developing	85211.7	336.062	479.572	389.654	351.948
92	KGZ	Kyrgyz Republic	developing	9426.86	139.26	151.618	190.515	154.889
93	KHM	Cambodia	ldc	20258.4	248.112	377.451	298.627	263.998
94	KIR	Kiribati	ldc	188.57	376.012	505.351	437.741	391.898
95	KNA	St. Kitts and Nevis	developing	46.882	-182.396	-170.039	-248.573	-166.51
96	KOR	South Korea	developed	45770.9	-283.032	-405.333	-456.033	-268.302
97	KWT	Kuwait	developing	5155.41	-1267.67	-1384.56	-1273.52	-1479.47
98	LAO	Laos	ldc	9775.55	261.255	390.594	299.794	277.042
99	LBN	Lebanon	developing	4937.58	18.2249	30.5825	13.053	34.1112
100	LBR	Liberia	ldc	8890.7	366.708	496.047	430.901	382.594
101	LBY	Libya	developing	8539.98	-395.428	-383.07	-413.728	-607.229
102	LCA	St. Lucia	developing	177.856	168.67	181.028	171.108	184.557
103	LIE	Liechtenstein	developed	42.287	-272.856	-370.941	-412.26	-256.97
104	LKA	Sri Lanka	developing	21815	287.201	505.586	287.546	303.088
105	LSO	Lesotho	ldc	2898.37	251.041	380.38	310.355	266.927
106	LTU	Lithuania	developed	2187.55	-1308.29	-1404.38	-1491.69	-1293.68
107	LUX	Luxembourg	developed	781.91	-1452.82	-1550.9	-1669.95	-1436.93
108	LVA	Latvia	developed	1433.73	-1048.23	-1200.74	-1184.9	-1032.34
109	MAR	Morocco	developing	45896.1	295.198	190.85	330.49	311.016
110	MCO	Monaco	developed	37.664	-13.1287	-111.214	-152.533	2.75758
111	MDA	Moldova	developed	2997.53	-611.145	-709.23	-603.93	-595.28
112	MDG	Madagascar	ldc	51593	333.808	463.147	398.057	349.695
113	MDV	Maldives	developing	569.909	327.09	339.447	309.558	342.976
114	MEX	Mexico	developing	143772	74.2788	100.946	64.0452	56.9333
115	MHL	Marshall Islands	developing	51.211	147.53	159.887	191.395	163.416
116	MKD	North Macedonia	developed	1909.31	-344.495	-442.58	-366.459	-330.403
117	MLI	Mali	ldc	47439.8	332.355	461.694	395.809	348.241
118	MLT	Malta	developed	522.737	18.3424	-105.711	-134.137	34.2287
119	MMR	Myanmar	ldc	59929.4	316.024	445.364	366.269	329.885
120	MNE	Montenegro	developed	586.385	-226.9	-324.985	-271.221	-212.116
121	MNG	Mongolia	developing	4518.86	-322.45	-310.093	-297.338	-317.652
122	MOZ	Mozambique	ldc	63044.5	345.775	475.114	411.005	361.34
123	MRT	Mauritania	ldc	8914.67	300.338	429.677	354.946	315.549
124	MUS	Mauritius	developing	1226.23	37.0333	-36.0126	-2.90303	52.9196
125	MWI	Malawi	ldc	37159.3	381.445	510.784	445.805	397.328
126	MYS	Malaysia	developing	41032.4	51.8187	-63.0357	12.3947	35.2668
127	NAM	Namibia	developing	3779.92	-5.83535	-55.0298	31.9214	10.051
128	NER	Niger	ldc	67043.3	376.433	505.772	442.549	392.233
129	NGA	Nigeria	developing	377460	313.309	449.014	367.74	320.342
130	NIC	Nicaragua	developing	9094.64	228.167	240.525	275.274	244.054
131	NIU	Niue	developing	2.096	35.9476	48.3052	30.0951	51.8339
132	NLD	Netherlands	developed	18168.8	-1000.66	-1144.03	-1213.24	-1042.34
133	NOR	Norway	developed	6367.56	-648.106	-774.622	-865.236	-859.908
134	NPL	Nepal	ldc	37401.4	296.094	425.433	349.053	311.98
135	NRU	Nauru	developing	14.695	162.909	175.267	180.382	178.795
136	NZL	New Zealand	developed	5951.43	-887.952	-983.283	-1003.75	-892.464
137	OMN	Oman	developing	6328.98	-416.892	-404.535	-471.065	-597.654
138	PAK	Pakistan	developing	367808	324.963	497.767	376.849	339.889
139	PAN	Panama	developing	5736.12	203.693	216.05	161.864	219.579
140	PER	Peru	developing	42022.6	222.393	213.651	240.521	231.692
141	PHL	Philippines	developing	157892	321.536	270.485	360.684	337.114
142	PLW	Palau	developing	16.689	-2636.49	-2624.13	-2642.61	-2620.6
143	PNG	Papua New Guinea	developing	14910.4	319.151	331.509	375.229	331.987
144	POL	Poland	developed	34932.3	-976.886	-1022.84	-1096.11	-989.478
145	PRK	North Korea	developing	25807.2	-54.9643	-42.6067	-60.8168	-44.9575
146	PRT	Portugal	developed	9261.31	-246.709	-374.559	-361.29	-232.226
147	PRY	Paraguay	developing	8591.49	-69.8795	-57.5219	-54.9504	-53.9932
148	QAT	Qatar	developing	3358.45	-2283.06	-2395.77	-2500.19	-2494.86
149	ROU	Romania	developed	17457.2	-563.133	-577.739	-674.806	-585.475
150	RUS	Russia	developed	133133	-1353.88	-1290.62	-1449.98	-1469.37
151	RWA	Rwanda	ldc	23030	379.591	508.93	441.396	395.477
152	SAU	Saudi Arabia	developing	48374.5	-231.464	-336.643	-327.936	-443.266
153	SDN	Sudan	ldc	84494.3	300.904	430.243	359.252	314.463
154	SEN	Senegal	ldc	32562.9	339.288	468.627	398.578	355.163
155	SGP	Singapore	developing	6337.23	-16.9103	-147.462	-234.04	-1.02398
156	SLB	Solomon Islands	ldc	1225.41	372.109	501.448	433.494	387.995
157	SLE	Sierra Leone	ldc	13595	356.744	486.083	420.093	372.63
158	SLV	El Salvador	developing	6636.85	242.952	255.31	268.065	258.839
159	SMR	San Marino	developed	32.044	-247.813	-345.898	-387.217	-231.927
160	SOM	Somalia	ldc	36462.8	301.541	430.88	367.232	317.427
161	SRB	Serbia	developed	5777.81	-676.792	-705.889	-724.996	-669.18
162	SSD	South Sudan	ldc	17460.8	62.5138	191.853	120.828	75.6873
163	STP	Sao Tome and Principe	ldc	366.663	367.338	496.677	423.357	383.224
164	SUR	Suriname	developing	725.519	-75.7154	-63.3578	-69.7702	-77.2794
165	SVK	Slovakia	developed	5186.97	-878.702	-1004.59	-970.143	-863.609
166	SVN	Slovenia	developed	2003.26	-511.107	-630.669	-652.639	-497.234
167	SWE	Sweden	developed	11902	-406.493	-555.558	-574.116	-390.755
168	SWZ	Eswatini	developing	1655.12	219.112	231.469	255.55	234.511
169	SYC	Seychelles	developing	116.644	110.419	122.777	56.3537	126.306
170	SYR	Syria	developing	38306.4	265.379	277.736	259.526	269.535
171	TCA	Turks and Caicos Islands	developing	52.865	251.238	263.596	240.567	267.125
172	TCD	Chad	ldc	36452	333.293	462.632	398.284	346.551
173	TGO	Togo	ldc	15478.9	337.887	467.226	400.303	353.773
174	THA	Thailand	developing	67880.1	47.4253	-105.962	25.6751	55.7645
175	TJK	Tajikistan	developing	15201	277.955	290.313	333.784	293.771
176	TKM	Turkmenistan	developing	8263.83	-420.298	-407.94	-426.15	-498.98
177	TLS	Timor-Leste	ldc	1806.87	231.977	361.316	281.926	207.829
178	TON	Tonga	developing	131.225	210.882	223.24	254.41	226.769
179	TTO	Trinidad and Tobago	developing	1485.14	-2794.31	-2781.95	-2844.33	-3006.11
180	TUN	Tunisia	developing	14315.8	200.321	212.679	224.669	205.815
181	TUR	Türkiye	developing	95829.3	153.416	199.208	99.1411	167.32
182	TUV	Tuvalu	ldc	13.211	251.176	380.515	298.639	267.062
183	TZA	Tanzania	ldc	129932	350.87	455.341	413.088	366.733
184	UGA	Uganda	ldc	87622.1	363.608	534.496	426.08	379.494
185	UKR	Ukraine	developed	32867.7	-1659.89	-1468.54	-1673.05	-1659.12
186	URY	Uruguay	developing	3337.14	-911.804	-899.446	-960.547	-895.918
187	USA	United States	developed	378476	-1674.51	-1789.38	-1884.21	-1737.43
188	UZB	Uzbekistan	developing	45593.1	-24.9087	-12.5512	13.8146	-22.3924
189	VCT	St. Vincent and the Grenadines	developing	101.691	127.067	139.425	125.137	142.954
190	VEN	Venezuela	developing	35937.4	-120.59	-70.748	-126.443	-246.942
191	VGB	British Virgin Islands	developing	34.768	129.758	142.115	123.905	145.644
192	VNM	Vietnam	developing	107013	250.247	150.515	270.178	262.268
193	VUT	Vanuatu	developing	578.567	259.557	271.915	320.23	275.443
194	WSM	Samoa	developing	320.016	265.867	278.224	315.295	281.753
195	YEM	Yemen	ldc	55296.3	354.891	484.23	413.205	366.218
196	ZAF	South Africa	developing	73529.8	-104.855	-62.8491	-90.287	-100.933
197	ZMB	Zambia	ldc	37460.4	295.128	513.513	355.064	310.964
198	ZWE	Zimbabwe	developing	26438.6	276.472	288.83	338.424	291.767
