# Supplementary material for: A justice-based framework to determine countries’ fair warming contributions to Paris Agreement
Source: Research Square preprint supplement (doi:10.21203/rs.3.rs-4129114/v1), 2024-03-29
Supplement: Supplementary file 3 [file e8b6f5c80aa57c8f467ff425.xlsx]

## Sheet: Start year=1850
year	ABW	AFG	AGO	AIA	ALB	AND	ANNEXI	ANT	AOSIS	ARE	ARG	ARM	ATG	AUS	AUT	AZE	BASIC	BDI	BEL	BEN	BFA	BGD	BGR	BHR	BHS	BIH	BLR	BLZ	BOL	BRA	BRB	BRN	BTN	BWA	CAF	CAN	CHE	CHL	CHN	CIV	CMR	COD	COG	COK	COL	COM	CPV	CRI	CUB
1980	7.871e-05	0.00046527	0.00078853	2.8e-07	6.535e-05	2.09e-06	0.370699	0.00063225	0.00288231	0.00019788	0.00531201	0.00015202	5.67e-06	0.0072586	0.00189731	0.00078824	0.0749891	6.767e-05	0.00450525	9.369e-05	0.00011913	0.00152457	0.00131566	0.0003487	3.532e-05	0.00036605	0.00174527	1.228e-05	0.0003213	0.00935597	5.367e-05	7.431e-05	4.439e-05	0.00017555	0.00033681	0.00931495	0.00091123	0.00071203	0.0383152	0.00017878	0.00024415	0.00118719	0.00011612	4.3e-07	0.00154086	7.53e-06	3.31e-06	9.207e-05	0.00071478
1981	8.493e-05	0.00053832	0.00104131	3.5e-07	6.938e-05	2.41e-06	0.37961	0.00069239	0.00320674	0.00026716	0.00572425	0.00018596	6.67e-06	0.00745957	0.00216904	0.00101559	0.0764368	7.062e-05	0.00488037	0.00010546	0.00012664	0.00169552	0.00162418	0.00048036	4.368e-05	0.00042434	0.00212558	1.284e-05	0.00037364	0.00970275	7.328e-05	0.00010163	3.915e-05	0.00021058	0.00036691	0.00941869	0.00113829	0.00090841	0.0385575	0.00021175	0.00028621	0.00143161	0.00014007	5.2e-07	0.00182495	8.61e-06	3.88e-06	0.0001177	0.00087319
1982	8.673e-05	0.00056254	0.00106712	3.8e-07	7.701e-05	2.83e-06	0.387247	0.00069847	0.00338726	0.00030337	0.00594554	0.00020012	7.23e-06	0.00834936	0.00213991	0.00105825	0.0793576	8.559e-05	0.00522058	0.00012231	0.00014174	0.00172871	0.00159051	0.0004726	4.835e-05	0.00045325	0.00214364	1.567e-05	0.00040858	0.0104036	7.647e-05	0.0001138	5.03e-05	0.00024724	0.00036014	0.0101804	0.00109588	0.00089525	0.0401825	0.00024424	0.00033402	0.00154465	0.00016385	6e-07	0.00192103	9.66e-06	4.39e-06	0.00012683	0.00093299
1983	6.623e-05	0.00051125	0.00092851	3.2e-07	6.662e-05	2.27e-06	0.395569	0.00062897	0.00313586	0.00034453	0.00592424	0.00023238	5.46e-06	0.00817978	0.00211583	0.00098795	0.0819796	6.599e-05	0.00484914	0.00012755	0.00017433	0.00160245	0.00141877	0.00046483	3.999e-05	0.00044742	0.0019968	1.053e-05	0.00040221	0.0108607	7.111e-05	0.0001212	3.322e-05	0.00025158	0.00039181	0.0103147	0.00096401	0.00079919	0.0420288	0.00025662	0.00034266	0.00132223	0.00018005	4.6e-07	0.00173762	6.97e-06	3.14e-06	0.00014826	0.00076764
1984	7.869e-05	0.0005895	0.00096829	3.9e-07	7.394e-05	2.85e-06	0.401824	0.00065015	0.00324318	0.00033642	0.0057307	0.00019238	6.51e-06	0.00807037	0.00201299	0.0011073	0.0831442	6.849e-05	0.00510149	0.00010246	0.00012591	0.00151515	0.00148822	0.00049807	4.83e-05	0.00049984	0.00201316	1.31e-05	0.00046687	0.0114925	6.315e-05	0.00011156	4.292e-05	0.00019795	0.00037734	0.0105465	0.00103489	0.00087194	0.042555	0.00020824	0.00034329	0.00128019	0.00014376	5.5e-07	0.001713	8.21e-06	3.72e-06	0.00011049	0.00082548
1985	7.843e-05	0.00060223	0.00123894	4.1e-07	7.468e-05	2.87e-06	0.410456	0.00074761	0.00397723	0.00032814	0.00662274	0.00019861	6.4e-06	0.00881727	0.00263697	0.00136413	0.0856681	6.002e-05	0.00607197	9.726e-05	0.00012545	0.00208176	0.0020018	0.00048656	4.862e-05	0.00047168	0.00273432	1.169e-05	0.00040492	0.0125418	6.548e-05	0.00011891	3.677e-05	0.00018273	0.00040175	0.011645	0.0013273	0.00104135	0.0443114	0.00020195	0.00032794	0.00169312	0.0001415	5.6e-07	0.00234305	8.04e-06	3.57e-06	0.00011401	0.00101767
1986	0.00012721	0.00066027	0.00114813	6.5e-07	0.00012399	4.68e-06	0.417553	0.00072277	0.00367914	0.0005306	0.00675914	0.00032686	1.055e-05	0.00929018	0.00223603	0.00129929	0.0882969	0.0001069	0.00541268	0.0001718	0.00021731	0.00185003	0.00175063	0.00065115	7.653e-05	0.00059695	0.00242305	2.054e-05	0.00057592	0.0126848	0.00011496	0.00019706	6.422e-05	0.00032703	0.00050534	0.0118845	0.0011758	0.00097395	0.0461244	0.00035637	0.00054519	0.0016713	0.00024791	9.6e-07	0.00217299	1.406e-05	6.2e-06	0.00019811	0.00092488
1987	7.222e-05	0.00066034	0.00119303	4.7e-07	8.369e-05	3.43e-06	0.426177	0.00072974	0.00407743	0.00043768	0.00685396	0.00023128	7.04e-06	0.00936081	0.00260778	0.00142783	0.0903756	7.18e-05	0.00603253	0.00011397	0.00015572	0.00204729	0.00187668	0.0005493	5.125e-05	0.00051158	0.00261587	1.425e-05	0.00052103	0.0130063	6.646e-05	0.00013993	4.311e-05	0.00023473	0.00042261	0.0118679	0.00133627	0.00105099	0.0472917	0.00026807	0.00048169	0.00160737	0.00019675	7.1e-07	0.00225483	1.003e-05	4.31e-06	0.00014042	0.00104308
1988	6.47e-05	0.00070135	0.00126418	4e-07	7.907e-05	3.15e-06	0.435278	0.00085018	0.00424937	0.00052307	0.00676282	0.00025307	6.12e-06	0.00933196	0.00251195	0.0015812	0.0922877	7.174e-05	0.00590268	0.00011481	0.00014383	0.00187831	0.00196964	0.00064729	4.272e-05	0.00063549	0.00275868	1.431e-05	0.00056188	0.0125399	6.7e-05	0.00012648	4.683e-05	0.00025555	0.00050148	0.0119752	0.00138525	0.00114651	0.0490941	0.00029883	0.00056817	0.00165658	0.00019134	6.1e-07	0.00227971	8.99e-06	3.89e-06	0.00012285	0.00112689
1989	0.00012664	0.00066519	0.00133042	7.4e-07	0.00013689	5.38e-06	0.442881	0.00092898	0.00442325	0.00059122	0.00696976	0.00032919	1.131e-05	0.00940672	0.00289464	0.00177919	0.0960917	0.00011476	0.00593792	0.00019218	0.00021682	0.00231865	0.00231683	0.00062254	8.064e-05	0.00068601	0.00315526	2.263e-05	0.00054529	0.0130601	0.00012924	0.00021794	6.853e-05	0.00029882	0.00054183	0.0119028	0.00154902	0.00117484	0.0510804	0.00034448	0.00059157	0.00186833	0.00026561	1.07e-06	0.00262975	1.556e-05	6.85e-06	0.00020889	0.00116547
1990	7.968e-05	0.00055525	0.00131637	4.4e-07	9.592e-05	3.47e-06	0.452112	0.00065447	0.00402634	0.00046984	0.00676131	0.00022338	6.61e-06	0.00952731	0.00255159	0.00172551	0.0987589	7.971e-05	0.00619188	0.00012382	0.00017309	0.00191728	0.00220533	0.00055495	4.354e-05	0.00052007	0.00286073	1.587e-05	0.00044911	0.0133001	6.73e-05	0.0001236	5.739e-05	0.00021458	0.0003947	0.0119778	0.00135727	0.00106736	0.0521089	0.00025615	0.00050946	0.00182996	0.00018182	6.5e-07	0.00248059	9.98e-06	4.27e-06	0.00013031	0.00098595
1991	0.00011475	0.00071063	0.00138902	7.5e-07	0.00012694	5.56e-06	0.457806	0.00083852	0.00421452	0.00064941	0.00668329	0.0003723	1.058e-05	0.00928804	0.00272156	0.00165679	0.100872	0.0001046	0.00581144	0.00017559	0.00024307	0.00201811	0.00220918	0.00064551	7.722e-05	0.00068859	0.00310884	2.166e-05	0.00061635	0.0133713	0.00011378	0.0002212	6.877e-05	0.00033764	0.00055283	0.0120165	0.0014291	0.00116354	0.0543242	0.00039706	0.00069188	0.00173149	0.00030004	1e-06	0.00254846	1.377e-05	6.36e-06	0.0002045	0.00123623
1992	7.961e-05	0.0005703	0.00137747	5.8e-07	9.332e-05	4.29e-06	0.465906	0.00063724	0.00405388	0.00056761	0.00674224	0.00028831	7.52e-06	0.0094906	0.00254331	0.00168625	0.104617	6.883e-05	0.00550996	0.00012175	0.0001536	0.00195789	0.00216106	0.00053875	5.578e-05	0.00054884	0.00297474	1.493e-05	0.00047288	0.0138393	7.946e-05	0.00016623	4.142e-05	0.00023094	0.00045194	0.0121905	0.00131427	0.00106159	0.0553219	0.00028703	0.00061634	0.00175788	0.00022714	7.1e-07	0.002534	9.52e-06	4.52e-06	0.00014628	0.00109351
1993	9.357e-05	0.00062769	0.00124422	7.2e-07	0.00011949	5.44e-06	0.471658	0.00075086	0.00385958	0.00075286	0.00644855	0.00036663	9.61e-06	0.00927534	0.00243881	0.00167089	0.10712	9.685e-05	0.00569249	0.00017109	0.00021181	0.00157987	0.00204163	0.00071979	6.843e-05	0.00070252	0.0028374	2.073e-05	0.00058856	0.0134747	0.00011024	0.0002241	5.69e-05	0.00033072	0.00056597	0.0120658	0.00129081	0.00108178	0.0568789	0.00039725	0.00077086	0.00144618	0.00031934	9.6e-07	0.00222496	1.325e-05	6.23e-06	0.00020176	0.00109149
1994	9.895e-05	0.00066193	0.00142923	7.5e-07	0.00012535	5.66e-06	0.479886	0.00078451	0.00395166	0.00077266	0.00646724	0.00037949	9.66e-06	0.00969614	0.00257717	0.00189348	0.109246	9.994e-05	0.00553981	0.00016687	0.00022139	0.001889	0.00223216	0.00070069	6.98e-05	0.0007009	0.00301417	2.025e-05	0.0005837	0.0147828	0.00010527	0.00021797	6.549e-05	0.00031261	0.00055351	0.0125013	0.0014792	0.00117555	0.0575635	0.00038422	0.00074303	0.00181445	0.00030989	9.5e-07	0.00251583	1.29e-05	6.16e-06	0.00019626	0.00120415
1995	0.00010961	0.00077811	0.00158814	8.1e-07	0.00014917	6.37e-06	0.485305	0.00088008	0.00415594	0.0008407	0.00694298	0.00041313	1.087e-05	0.00984663	0.00258523	0.00202646	0.11196	0.00012111	0.00553943	0.0002031	0.00026662	0.00203338	0.00226575	0.0007673	7.456e-05	0.00079	0.00294447	2.571e-05	0.00069263	0.0150934	0.00011575	0.00023268	7.919e-05	0.00037098	0.00066564	0.0129212	0.00163182	0.00136059	0.0604394	0.00044567	0.00084892	0.00185113	0.00035046	1.09e-06	0.00246806	1.575e-05	7.33e-06	0.00022179	0.00133211
1996	9.63e-05	0.00058295	0.00135345	7.9e-07	0.00012974	6.02e-06	0.492231	0.0007355	0.00396186	0.00080556	0.00678949	0.00039079	9.47e-06	0.00983198	0.00231634	0.00169952	0.114644	9.332e-05	0.00542035	0.00016893	0.00022421	0.0015942	0.00198111	0.00065477	6.719e-05	0.00067232	0.00286932	2.096e-05	0.00055903	0.0153873	0.00010184	0.00021743	5.834e-05	0.00031408	0.00054371	0.0128934	0.00134006	0.00107138	0.0625362	0.00039043	0.00071936	0.00150635	0.00032617	9.7e-07	0.00217226	1.304e-05	6.48e-06	0.00019893	0.00106673
1997	0.00010727	0.00061913	0.00162034	8.7e-07	0.00013813	6.65e-06	0.498048	0.00070351	0.00448475	0.0008713	0.0071074	0.00038156	1.038e-05	0.0100106	0.00257034	0.00193096	0.11817	0.0001049	0.00588034	0.00018212	0.00023096	0.00171644	0.00223163	0.00070769	7.477e-05	0.00065148	0.00315069	2.359e-05	0.00060657	0.015963	0.00010584	0.00022705	6.562e-05	0.00034227	0.00059017	0.0135236	0.00145291	0.00116259	0.0655136	0.00040028	0.00078513	0.00176821	0.00034375	1.05e-06	0.0025543	1.373e-05	6.97e-06	0.00020743	0.00110225
1998	0.0001092	0.00064305	0.00140214	9.8e-07	0.00015929	7.4e-06	0.5053	0.00081662	0.00421511	0.00096171	0.00695882	0.00046939	1.158e-05	0.0103679	0.00217311	0.00157689	0.121922	0.00011905	0.00571331	0.00022001	0.00028957	0.00155822	0.00179421	0.00075311	8.053e-05	0.00073287	0.00272048	2.653e-05	0.00064761	0.0161187	0.00013191	0.00027783	7.289e-05	0.00041152	0.00067756	0.0137416	0.00132731	0.00111927	0.0671925	0.00050477	0.00079731	0.0015226	0.00043217	1.26e-06	0.00220153	1.683e-05	8.36e-06	0.00025797	0.00110487
1999	9.991e-05	0.00056479	0.00161276	9.5e-07	0.00013552	7.22e-06	0.510389	0.00074562	0.00470009	0.00094241	0.00759547	0.00038452	1.042e-05	0.0110147	0.00267956	0.00197837	0.126993	9.789e-05	0.00630356	0.00017344	0.00022536	0.00186003	0.00224208	0.00068061	7.309e-05	0.00063002	0.00316769	2.418e-05	0.00057124	0.0169217	0.00010216	0.00021424	5.991e-05	0.00030904	0.0005701	0.0146063	0.00146179	0.00116331	0.0697201	0.00038729	0.00073029	0.00182025	0.00033521	1.13e-06	0.00260117	1.349e-05	7.37e-06	0.00019949	0.00114026
2000	0.00010859	0.00078624	0.00226332	1e-06	0.00016744	7.67e-06	0.516125	0.00086748	0.00506213	0.00122479	0.00745632	0.00046389	1.167e-05	0.0108594	0.00319389	0.00227743	0.129974	0.00012723	0.00652419	0.00023696	0.00031601	0.00237295	0.00269103	0.00095603	7.873e-05	0.00079656	0.00367984	2.84e-05	0.00079834	0.0171875	0.00013592	0.00028394	7.959e-05	0.0004387	0.00083525	0.0145558	0.00178467	0.00153318	0.073396	0.00053587	0.00104073	0.00242119	0.0004751	1.35e-06	0.00321445	1.791e-05	9.01e-06	0.00027291	0.00146842
2001	8.202e-05	0.00056571	0.0017948	8.4e-07	0.0001323	6.39e-06	0.52406	0.00067786	0.0045682	0.00111313	0.00726923	0.00035768	8.92e-06	0.01086	0.0023922	0.00178295	0.135318	9.258e-05	0.00608086	0.00017909	0.00024126	0.00190423	0.00202794	0.00074364	6.124e-05	0.00059803	0.00276377	2.161e-05	0.00059369	0.0176578	9.931e-05	0.0002158	5.908e-05	0.00032497	0.00067071	0.0153237	0.00147746	0.00126042	0.0752905	0.00040799	0.0007942	0.00174087	0.0003788	1.07e-06	0.00239864	1.326e-05	7.02e-06	0.00020577	0.00114865
2002	9.711e-05	0.00080292	0.00198366	8.1e-07	0.00015795	5.95e-06	0.531669	0.00093335	0.00460898	0.00131564	0.00774707	0.00050231	7.75e-06	0.0117476	0.00268868	0.00193268	0.140462	0.00010527	0.00650815	0.00022636	0.00030394	0.00210058	0.0022209	0.00094866	6.062e-05	0.00084278	0.00302001	1.708e-05	0.00080925	0.0178316	0.00010942	0.00028012	5.357e-05	0.0004497	0.00093987	0.0156833	0.0016237	0.00141762	0.0781226	0.00056326	0.0010001	0.00191023	0.00050406	9e-07	0.00268643	9.78e-06	5.65e-06	0.00026153	0.00134472
2003	9.201e-05	0.00050208	0.0018015	1e-06	0.00013271	7.48e-06	0.539492	0.00072034	0.00513026	0.00121353	0.00762559	0.00037895	9.47e-06	0.0110656	0.00263821	0.00187345	0.144247	8.899e-05	0.00656979	0.00017118	0.00021417	0.00171569	0.00214604	0.00069118	6.944e-05	0.00061913	0.00306682	2.267e-05	0.00052627	0.018097	9.317e-05	0.00021518	5.474e-05	0.00032596	0.00072733	0.0152691	0.00150002	0.00123747	0.0812907	0.00040816	0.00073767	0.0015781	0.00037621	1.1e-06	0.002708	1.187e-05	7.15e-06	0.00019869	0.00110169
2004	7.555e-05	0.00050082	0.00197895	8.5e-07	0.00012858	6.17e-06	0.545655	0.00058271	0.00461136	0.00113861	0.00712893	0.00031685	8.19e-06	0.0107352	0.00245388	0.00160893	0.14756	7.716e-05	0.00582222	0.00016425	0.0002376	0.00181855	0.00190103	0.00068682	5.62e-05	0.00051377	0.00290146	1.881e-05	0.00055777	0.0183398	9.294e-05	0.00020599	4.991e-05	0.00028281	0.0006631	0.0154663	0.00128522	0.00110244	0.0826903	0.00037954	0.00071375	0.00178635	0.00036872	1.01e-06	0.00265413	1.226e-05	6.7e-06	0.00019296	0.00098626
2005	0.00010156	0.0005715	0.00219575	1.2e-06	0.00016133	8.57e-06	0.552133	0.00077829	0.00501273	0.00157816	0.00749529	0.00043016	1.089e-05	0.0110853	0.002807	0.00205216	0.150673	9.185e-05	0.00601707	0.00020199	0.00028261	0.00205152	0.00234572	0.00088625	7.857e-05	0.00068054	0.00314273	2.375e-05	0.00066865	0.0191004	0.00011881	0.0002726	5.572e-05	0.0003587	0.00086286	0.0161024	0.00166013	0.00143697	0.0856299	0.00048821	0.00090285	0.00201551	0.0004749	1.31e-06	0.00296833	1.465e-05	8.59e-06	0.00024627	0.0012126
2006	8.048e-05	0.00057293	0.00231806	9.2e-07	0.00016545	6.9e-06	0.558796	0.00072472	0.0055148	0.00154349	0.00823697	0.00033855	9.6e-06	0.0121414	0.00278534	0.00189946	0.15554	0.0001138	0.0067199	0.00022704	0.00031454	0.00233547	0.00210441	0.00083761	5.886e-05	0.00061039	0.00337869	2.65e-05	0.00066024	0.02062	0.00011619	0.00024535	7.771e-05	0.00035766	0.00086969	0.0172748	0.00151911	0.00136267	0.0898451	0.0004863	0.00085728	0.00209168	0.00047639	1.23e-06	0.00309555	1.721e-05	8.89e-06	0.00024794	0.00123685
2007	9.645e-05	0.00061072	0.00268981	1.21e-06	0.00014874	8.62e-06	0.564759	0.00077103	0.00545492	0.00194002	0.00851782	0.0003789	1.016e-05	0.0123318	0.00313556	0.00231487	0.161484	9.303e-05	0.00642922	0.00019114	0.00026243	0.00251614	0.00253481	0.00093167	7.275e-05	0.00067154	0.00348604	2.541e-05	0.0006864	0.0206968	0.00010021	0.00023395	5.746e-05	0.00033947	0.00103957	0.0176604	0.00187034	0.00174093	0.0936302	0.0004563	0.00101339	0.00239951	0.00042562	1.2e-06	0.00343527	1.292e-05	8.31e-06	0.0002211	0.00146423
2008	0.00010978	0.00074413	0.00283368	1.38e-06	0.00017828	9.74e-06	0.570922	0.00082229	0.0059996	0.00199183	0.00864671	0.00043548	1.188e-05	0.0124634	0.00314658	0.00222351	0.166464	0.00011583	0.00678342	0.00023838	0.00033852	0.00262765	0.00253569	0.00104685	8.235e-05	0.00074788	0.00360523	3.072e-05	0.00085052	0.0218826	0.00012349	0.00028309	7.226e-05	0.00041468	0.00120245	0.0182305	0.00181182	0.00167609	0.0977729	0.00055815	0.00116807	0.00237779	0.0005254	1.44e-06	0.00355418	1.641e-05	1.012e-05	0.00027059	0.00142182
2009	0.00013264	0.00077199	0.00229918	1.76e-06	0.00021838	1.193e-05	0.577309	0.00091103	0.00578534	0.00193809	0.0082985	0.00052269	1.427e-05	0.0124823	0.00298063	0.00206296	0.171674	0.00012548	0.00643703	0.00027688	0.00041677	0.00247862	0.00231055	0.00099712	9.969e-05	0.00083061	0.00319721	3.432e-05	0.00085745	0.0225925	0.00014944	0.00034869	7.821e-05	0.00046227	0.00104194	0.0183388	0.0017597	0.00161522	0.102418	0.00065764	0.00100446	0.00199392	0.00063387	1.73e-06	0.00308421	1.94e-05	1.21e-05	0.00032372	0.00139488
2010	0.00010302	0.00071118	0.00251256	1.38e-06	0.00017477	9.2e-06	0.583398	0.00075079	0.00571756	0.00198671	0.00846325	0.00039808	1.1e-05	0.012508	0.0027834	0.00200653	0.177407	0.0001019	0.00646791	0.00024232	0.00039174	0.00243023	0.00226274	0.00100111	7.432e-05	0.000705	0.0031982	2.769e-05	0.00079987	0.0221819	0.00011427	0.0002935	6.608e-05	0.00041822	0.00113311	0.0177227	0.00165726	0.00157933	0.106477	0.00059701	0.00107773	0.00207277	0.00059129	1.34e-06	0.00315279	1.564e-05	9.66e-06	0.00027471	0.001344
2011	8.441e-05	0.00064122	0.00263825	1.31e-06	0.00014191	8.46e-06	0.589352	0.00074218	0.00625612	0.00213976	0.00872215	0.00032562	9.42e-06	0.0126096	0.00291165	0.00210614	0.184024	8.444e-05	0.00678823	0.00018702	0.00028958	0.00240724	0.00232503	0.0009387	6.507e-05	0.00067746	0.00358849	2.487e-05	0.00070529	0.0219692	9.42e-05	0.00022711	5.063e-05	0.00031592	0.0010629	0.0183305	0.00171071	0.00163805	0.110627	0.00045495	0.0010103	0.00211442	0.00042129	1.14e-06	0.00361352	1.229e-05	8.54e-06	0.00021559	0.00136715
2012	0.00010059	0.00079749	0.00309182	1.54e-06	0.00020502	9.85e-06	0.595876	0.00071723	0.0065365	0.00253886	0.00884263	0.00042709	1.229e-05	0.0130559	0.00318272	0.00225795	0.191657	0.00012185	0.00694472	0.00029185	0.00049463	0.00290728	0.00247793	0.0011357	7.95e-05	0.0007302	0.00359957	3.297e-05	0.00092416	0.0231823	0.00015002	0.00035476	7.328e-05	0.0004651	0.00116373	0.0190409	0.00178128	0.00176621	0.117423	0.00067004	0.00117847	0.00269001	0.00068971	1.62e-06	0.00386842	2.073e-05	1.231e-05	0.00032733	0.0013878
2013	9.006e-05	0.00068733	0.00276883	1.47e-06	0.00017567	9.19e-06	0.600639	0.00064501	0.0060836	0.00233575	0.00838766	0.0003664	1.081e-05	0.0127715	0.00288968	0.00197767	0.199398	0.00010629	0.00629659	0.00025018	0.00042288	0.00261406	0.00216792	0.00094298	7.092e-05	0.00064421	0.00334482	3.027e-05	0.00075661	0.022967	0.00012292	0.0002966	6.318e-05	0.00040914	0.00094376	0.0187068	0.00153416	0.00156535	0.122177	0.00057186	0.00096524	0.0022492	0.00057465	1.4e-06	0.0035228	1.708e-05	1.09e-05	0.00027873	0.00124303
2014	0.0001016	0.00085302	0.00279714	1.57e-06	0.0001891	9.63e-06	0.60593	0.00074434	0.00659919	0.00256279	0.00871709	0.00038019	1.141e-05	0.0129882	0.00295704	0.00224798	0.206504	0.00011059	0.0068191	0.0002544	0.00043907	0.00279785	0.00238661	0.00111442	7.417e-05	0.00072717	0.00341683	3.096e-05	0.00092387	0.0237976	0.00012357	0.00029343	7.031e-05	0.00040326	0.00109819	0.0185035	0.00189585	0.00191115	0.127744	0.00060041	0.00114992	0.00228057	0.00058725	1.44e-06	0.00364051	1.775e-05	1.113e-05	0.00028068	0.00150463
2015	8.523e-05	0.00052405	0.00221095	1.36e-06	0.00015728	8.28e-06	0.610539	0.0006008	0.00619794	0.00222509	0.00827133	0.0003174	9.7e-06	0.0127372	0.00270323	0.00182274	0.21467	9.938e-05	0.00628005	0.0002143	0.00033288	0.00235624	0.00203591	0.00077993	6.295e-05	0.00058745	0.00299434	2.835e-05	0.00058221	0.023328	0.00010283	0.00024583	6.145e-05	0.00033895	0.00062201	0.01894	0.00145001	0.00144272	0.132666	0.00046504	0.00069993	0.00177569	0.00043183	1.22e-06	0.00312488	1.503e-05	9.79e-06	0.00024232	0.00109429
2016	0.00010548	0.00082852	0.00284266	1.75e-06	0.000206	1.038e-05	0.616732	0.00075213	0.00678226	0.00299088	0.00892546	0.00039991	1.224e-05	0.0132733	0.00325193	0.0024422	0.223828	0.00012143	0.00683462	0.00028726	0.00051114	0.0031205	0.00257358	0.00106324	7.891e-05	0.00072776	0.00359869	3.467e-05	0.00088186	0.0250657	0.00013298	0.00031829	7.602e-05	0.00043919	0.00085229	0.0195165	0.00197749	0.00199219	0.139272	0.00063147	0.00101974	0.00231325	0.00060579	1.56e-06	0.00371335	1.98e-05	1.251e-05	0.00031011	0.00151692
2017	0.00013516	0.00083919	0.00300036	2.06e-06	0.00025096	1.247e-05	0.621908	0.00080892	0.00698534	0.00295392	0.00908326	0.00048255	1.5e-05	0.0138804	0.00319883	0.00229434	0.230843	0.00015289	0.00711908	0.00034506	0.00056743	0.00306117	0.00256046	0.00112611	9.657e-05	0.00080509	0.00363067	4.245e-05	0.00090386	0.0253626	0.00015813	0.0003721	9.857e-05	0.00052041	0.00093936	0.0202059	0.00181861	0.00188122	0.14603	0.00070795	0.00108166	0.00239964	0.00067825	1.88e-06	0.00393248	2.389e-05	1.483e-05	0.00036952	0.00141714
2018	0.00010173	0.00082115	0.00291532	1.88e-06	0.00019443	1.052e-05	0.626726	0.0007239	0.00681575	0.00305528	0.00886498	0.00039061	1.186e-05	0.0131452	0.00297488	0.00228171	0.24086	0.0001009	0.00625893	0.00026521	0.00050004	0.00295439	0.00231928	0.00109677	7.93e-05	0.0007135	0.00346999	3.115e-05	0.0008765	0.025128	0.00012643	0.00031206	5.957e-05	0.00039814	0.00079544	0.0195242	0.00178427	0.00191986	0.153321	0.00062442	0.00102946	0.00238959	0.0005799	1.52e-06	0.0038458	1.791e-05	1.211e-05	0.00029551	0.00139593
2019	8.616e-05	0.00085894	0.00280187	1.55e-06	0.00020346	8.92e-06	0.630987	0.00076021	0.00670584	0.00317807	0.00858226	0.00042951	1.031e-05	0.0131519	0.00304045	0.00218775	0.248814	0.00011087	0.00642923	0.00031423	0.00059651	0.00292835	0.00224708	0.0011811	6.624e-05	0.00078053	0.00355963	3.292e-05	0.00095707	0.025033	0.00012356	0.00034955	6.368e-05	0.0004676	0.00086411	0.0191314	0.00171159	0.00185244	0.158408	0.00073325	0.00110436	0.00230103	0.00070272	1.35e-06	0.00374863	1.712e-05	1.137e-05	0.00034255	0.00137286
2020	0.00013489	0.00101222	0.00306274	2.44e-06	0.00026817	1.354e-05	0.633709	0.00085378	0.00704622	0.00337018	0.00891184	0.00047035	1.577e-05	0.0133448	0.00319944	0.0023468	0.253958	0.00014583	0.00649003	0.00037252	0.00068272	0.00329583	0.0024009	0.00130884	0.00010206	0.00087361	0.0035825	4.294e-05	0.00107127	0.0259629	0.00016756	0.00040379	9.059e-05	0.00051039	0.00093956	0.0198272	0.00190877	0.00206729	0.161785	0.00079374	0.0012205	0.00260267	0.000767	2.01e-06	0.00406422	2.551e-05	1.635e-05	0.00039901	0.00152654
2021	0.00012357	0.00087659	0.00272584	2.25e-06	0.00022956	1.254e-05	0.636082	0.00081976	0.00667256	0.00327441	0.00866578	0.0004527	1.523e-05	0.0130583	0.00290799	0.00226478	0.261423	0.00014963	0.00599092	0.00034677	0.0005954	0.00282682	0.00229604	0.00120229	9.503e-05	0.00084306	0.00322697	4.537e-05	0.00092259	0.0265426	0.00014641	0.0003476	8.909e-05	0.00050719	0.00088386	0.0195867	0.00182059	0.00200736	0.16656	0.00074191	0.00112861	0.00228026	0.00067259	2e-06	0.00365604	2.747e-05	1.668e-05	0.00036862	0.00143509
[truncated: 164 more columns]

## Sheet: Start year=1990
year	Baseline_start_1990_except_ISO3_ABW	Baseline_start_1990_except_ISO3_AFG	Baseline_start_1990_except_ISO3_AGO	Baseline_start_1990_except_ISO3_AIA	Baseline_start_1990_except_ISO3_ALB	Baseline_start_1990_except_ISO3_AND	Baseline_start_1990_except_ISO3_ANT	Baseline_start_1990_except_ISO3_ARE	Baseline_start_1990_except_ISO3_ARG	Baseline_start_1990_except_ISO3_ARM	Baseline_start_1990_except_ISO3_ATG	Baseline_start_1990_except_ISO3_AUS	Baseline_start_1990_except_ISO3_AUT	Baseline_start_1990_except_ISO3_AZE	Baseline_start_1990_except_ISO3_BDI	Baseline_start_1990_except_ISO3_BEL	Baseline_start_1990_except_ISO3_BEN	Baseline_start_1990_except_ISO3_BFA	Baseline_start_1990_except_ISO3_BGD	Baseline_start_1990_except_ISO3_BGR	Baseline_start_1990_except_ISO3_BHR	Baseline_start_1990_except_ISO3_BHS	Baseline_start_1990_except_ISO3_BIH	Baseline_start_1990_except_ISO3_BLR	Baseline_start_1990_except_ISO3_BLZ	Baseline_start_1990_except_ISO3_BOL	Baseline_start_1990_except_ISO3_BRA	Baseline_start_1990_except_ISO3_BRB	Baseline_start_1990_except_ISO3_BRN	Baseline_start_1990_except_ISO3_BTN	Baseline_start_1990_except_ISO3_BWA	Baseline_start_1990_except_ISO3_CAF	Baseline_start_1990_except_ISO3_CAN	Baseline_start_1990_except_ISO3_CHE	Baseline_start_1990_except_ISO3_CHL	Baseline_start_1990_except_ISO3_CHN	Baseline_start_1990_except_ISO3_CIV	Baseline_start_1990_except_ISO3_CMR	Baseline_start_1990_except_ISO3_COD	Baseline_start_1990_except_ISO3_COG	Baseline_start_1990_except_ISO3_COK	Baseline_start_1990_except_ISO3_COL	Baseline_start_1990_except_ISO3_COM	Baseline_start_1990_except_ISO3_CPV	Baseline_start_1990_except_ISO3_CRI	Baseline_start_1990_except_ISO3_CUB	Baseline_start_1990_except_ISO3_CYP	Baseline_start_1990_except_ISO3_CZE	Baseline_start_1990_except_ISO3_DEU
1990	1e-08	1.67e-06	7.14e-06	1e-08	3.1e-07	1e-08	3e-08	2.62e-06	2.16e-05	8.4e-07	2e-08	2.799e-05	2.43e-06	3.68e-06	3.3e-07	3.01e-06	7.6e-07	1.17e-06	6.75e-06	3.27e-06	2.75e-06	5e-08	1.3e-06	5.32e-06	7e-08	2.45e-06	6.454e-05	4.4e-07	8.7e-07	1.8e-07	1.54e-06	2.09e-06	2.155e-05	1.44e-06	2.78e-06	0.00019155	1.57e-06	4.51e-06	1.14e-05	1.84e-06	1e-08	9.12e-06	7e-08	3e-08	8.4e-07	2.22e-06	1.6e-07	5.55e-06	2.864e-05
1991	5e-08	8.02e-06	3.444e-05	1e-08	1.66e-06	5e-08	4.1e-07	1.468e-05	0.00010748	4.92e-06	9e-08	0.00014703	1.434e-05	2.084e-05	1.51e-06	1.932e-05	3.61e-06	5.53e-06	3.355e-05	1.861e-05	1.404e-05	3.2e-07	7.3e-06	2.989e-05	3.2e-07	1.188e-05	0.00033775	2.14e-06	4.41e-06	8.5e-07	7.19e-06	9.75e-06	0.00012352	8.83e-06	1.45e-05	0.00102224	7.59e-06	2.11e-05	5.603e-05	8.71e-06	2e-08	4.621e-05	2.9e-07	1.3e-07	4.12e-06	1.197e-05	9.8e-07	3.354e-05	0.00018401
1992	1.7e-07	1.993e-05	8.22e-05	2e-08	4.67e-06	1.6e-07	1.61e-06	4.217e-05	0.00027095	1.445e-05	2.4e-07	0.0003847	4.263e-05	5.924e-05	3.64e-06	6.33e-05	8.87e-06	1.366e-05	7.987e-05	5.306e-05	3.741e-05	1e-06	2.05e-05	8.462e-05	7.9e-07	3.004e-05	0.00083026	5.42e-06	1.14e-05	2.04e-06	1.738e-05	2.342e-05	0.00035853	2.698e-05	3.893e-05	0.0029871	1.908e-05	5.094e-05	0.0001304	2.137e-05	4e-08	0.00011573	7.1e-07	3.3e-07	1.054e-05	3.292e-05	2.99e-06	9.984e-05	0.00057247
1993	4e-07	4.134e-05	0.00016897	4e-08	1e-05	3.6e-07	3.5e-06	9.135e-05	0.00056595	3.073e-05	5e-07	0.00080337	9.152e-05	0.00012257	7.54e-06	0.00013842	1.843e-05	2.826e-05	0.00016429	0.00011008	8.028e-05	2.18e-06	4.159e-05	0.00017799	1.69e-06	6.293e-05	0.00151818	1.126e-05	2.342e-05	4.19e-06	3.539e-05	4.875e-05	0.00077087	5.852e-05	8.187e-05	0.00536877	3.965e-05	0.00010339	0.0002663	4.385e-05	8e-08	0.00024173	1.48e-06	7e-07	2.229e-05	6.871e-05	6.56e-06	0.00021085	0.00123148
1994	6.6e-07	5.558e-05	0.00022894	6e-08	1.435e-05	5.7e-07	5.58e-06	0.00013491	0.00077647	4.483e-05	7.1e-07	0.00112136	0.00013469	0.00017175	1e-05	0.00020512	2.481e-05	3.799e-05	0.00022072	0.00015575	0.00011301	3.31e-06	5.549e-05	0.00025065	2.32e-06	8.642e-05	0.00226648	1.545e-05	3.206e-05	5.53e-06	4.681e-05	6.455e-05	0.00112776	8.754e-05	0.00011566	0.00832558	5.384e-05	0.00013573	0.00035286	5.848e-05	1.2e-07	0.00033245	1.98e-06	9.6e-07	3.095e-05	9.577e-05	9.99e-06	0.00029585	0.0018056
1995	9.1e-07	7.222e-05	0.0003063	9e-08	1.866e-05	7.7e-07	7.55e-06	0.00018143	0.00101243	5.687e-05	9.3e-07	0.00144931	0.00017733	0.00021905	1.312e-05	0.00028217	3.249e-05	4.892e-05	0.0002837	0.00019994	0.00014806	4.38e-06	6.668e-05	0.00032745	3.14e-06	0.0001125	0.00299168	1.997e-05	4.11e-05	7.28e-06	6.091e-05	8.721e-05	0.00150542	0.00011609	0.00015257	0.0109518	7.041e-05	0.00017222	0.00044852	7.485e-05	1.6e-07	0.00043423	2.55e-06	1.27e-06	4.072e-05	0.00012383	1.348e-05	0.00039978	0.00242859
1996	1.59e-06	0.00011044	0.00046633	1.6e-07	2.94e-05	1.28e-06	1.279e-05	0.00029849	0.00126352	8.566e-05	1.47e-06	0.00178304	0.00028018	0.00033062	1.951e-05	0.00045432	4.955e-05	7.538e-05	0.00042392	0.00030363	0.00023453	7.07e-06	9.106e-05	0.00048731	4.67e-06	0.0001757	0.00347271	3.1e-05	6.353e-05	1.088e-05	9.138e-05	0.00013224	0.00194532	0.00018444	0.00023911	0.0147706	0.00010849	0.00025575	0.00059507	0.00011446	2.6e-07	0.00060458	3.91e-06	1.97e-06	6.38e-05	0.00018824	2.211e-05	0.0005858	0.00309527
1997	1.72e-06	0.00010909	0.00055048	1.7e-07	2.957e-05	1.37e-06	1.373e-05	0.00033607	0.00160827	8.444e-05	1.48e-06	0.00222688	0.00030495	0.0003492	1.945e-05	0.00048415	4.906e-05	7.326e-05	0.00047869	0.00032719	0.00024199	7.3e-06	8.778e-05	0.00051161	4.83e-06	0.00017353	0.00447077	3.021e-05	6.213e-05	1.096e-05	9.158e-05	0.00014224	0.00247668	0.00019097	0.00025819	0.0188839	0.00010796	0.00026553	0.0007043	0.00011284	2.7e-07	0.00069704	3.79e-06	1.97e-06	6.334e-05	0.00019382	2.302e-05	0.00063418	0.00389186
1998	2.37e-06	0.00016574	0.00073934	2.4e-07	4.292e-05	1.86e-06	1.845e-05	0.00045565	0.00170336	0.00011366	2.14e-06	0.0023579	0.00039942	0.00044873	2.859e-05	0.00065157	7.376e-05	0.00011241	0.00064255	0.00042054	0.00034359	1.009e-05	0.00011617	0.00067388	6.72e-06	0.00025994	0.00516009	4.507e-05	9.207e-05	1.612e-05	0.00013465	0.00021584	0.00270061	0.00026183	0.00035221	0.0224542	0.00016198	0.00036913	0.00083656	0.00017385	4.1e-07	0.00088594	5.74e-06	2.92e-06	9.46e-05	0.0002698	3.236e-05	0.00086151	0.00418923
1999	2.72e-06	0.00015432	0.00071293	2.7e-07	4.366e-05	2.1e-06	2.067e-05	0.00045649	0.00206236	0.0001104	2.17e-06	0.00312063	0.00039393	0.00041857	2.817e-05	0.00065809	7.254e-05	0.00010568	0.00057518	0.00040181	0.00031138	1.077e-05	0.00010785	0.00062639	7.07e-06	0.00023631	0.00623455	4.338e-05	8.914e-05	1.618e-05	0.0001256	0.00021353	0.00342948	0.00026293	0.00034128	0.0262526	0.00015254	0.00032279	0.00081392	0.00016402	4.2e-07	0.00088657	5.46e-06	2.92e-06	9.245e-05	0.00025669	3.491e-05	0.00083672	0.00530733
2000	3.15e-06	0.00021724	0.00100302	3.1e-07	5.513e-05	2.39e-06	2.245e-05	0.00061211	0.00274951	0.00013051	2.7e-06	0.0039332	0.0004981	0.00052991	3.577e-05	0.00082062	9.529e-05	0.00014497	0.00079936	0.00050637	0.0004225	1.269e-05	0.00013452	0.0008075	8.51e-06	0.00032523	0.00760874	5.641e-05	0.00011548	2.068e-05	0.00016925	0.00031873	0.00451197	0.00032586	0.00045607	0.0297945	0.00020922	0.00045285	0.00112787	0.00023119	5.4e-07	0.00121098	7.26e-06	3.77e-06	0.00012059	0.0003364	4.155e-05	0.00105318	0.00660216
2001	3.54e-06	0.00020445	0.00101151	3.3e-07	5.437e-05	2.51e-06	2.247e-05	0.00063011	0.00242406	0.00011835	2.62e-06	0.00339422	0.00049046	0.00049584	3.227e-05	0.00082672	8.932e-05	0.00013555	0.00078236	0.00048085	0.00040311	1.276e-05	0.0001231	0.00075729	8.08e-06	0.00030874	0.00773325	5.248e-05	0.00010828	1.929e-05	0.00015545	0.00033035	0.00401658	0.00032259	0.00045085	0.0336119	0.00019792	0.00041942	0.00104933	0.00022599	5.4e-07	0.00116357	6.68e-06	3.6e-06	0.00011328	0.00032088	4.223e-05	0.00102134	0.00654893
2002	3.85e-06	0.00022908	0.00125769	3.4e-07	4.806e-05	2.5e-06	2.214e-05	0.00080376	0.0027979	0.00012143	2.33e-06	0.0040272	0.0006188	0.00062452	2.569e-05	0.00107477	8.178e-05	0.00014053	0.00098302	0.00060577	0.00048512	1.199e-05	0.00013277	0.00097729	6.94e-06	0.00036121	0.008616	4.343e-05	0.00010575	1.574e-05	0.00017015	0.00040257	0.00480499	0.00039668	0.00056312	0.0374481	0.0002235	0.00051011	0.00125356	0.00025606	4.7e-07	0.00139691	5.35e-06	3.03e-06	0.00011295	0.00039045	3.977e-05	0.00127608	0.00675656
2003	5.57e-06	0.00021002	0.00106145	4.4e-07	6.153e-05	3.29e-06	2.866e-05	0.00077073	0.00281865	0.0001252	2.98e-06	0.00420982	0.00058197	0.0005543	3.35e-05	0.00101495	9.391e-05	0.00014038	0.00083114	0.00054885	0.00041623	1.548e-05	0.00013992	0.00085282	9.47e-06	0.00031198	0.00953358	5.427e-05	0.00011331	2.062e-05	0.00016476	0.00038116	0.00538952	0.00038678	0.00052688	0.0411354	0.00021179	0.00042543	0.00100915	0.00023391	5.9e-07	0.00124025	6.72e-06	3.97e-06	0.00012084	0.00036075	5.177e-05	0.00118956	0.00799875
2004	5.76e-06	0.00022503	0.00115518	4.1e-07	6.356e-05	2.94e-06	2.567e-05	0.00079181	0.003183	0.0001148	2.96e-06	0.00453779	0.00054014	0.00052265	3.288e-05	0.00091298	9.777e-05	0.0001561	0.00090226	0.0004994	0.00044045	1.455e-05	0.00013455	0.00077903	8.64e-06	0.00033632	0.00986651	5.736e-05	0.00012092	2.031e-05	0.00016074	0.00042183	0.00556174	0.00035473	0.00051357	0.044327	0.00022132	0.00044946	0.00111459	0.00025521	5.9e-07	0.00127651	7.3e-06	4.06e-06	0.00012194	0.00034816	4.892e-05	0.00108857	0.00836069
2005	8.63e-06	0.00029357	0.00148394	5.9e-07	8.566e-05	4.19e-06	3.696e-05	0.00109721	0.00344387	0.00015487	4.02e-06	0.00499067	0.00074911	0.00071328	4.314e-05	0.00127593	0.00012827	0.00020652	0.00119303	0.00068658	0.00057682	2.023e-05	0.00018447	0.00106194	1.179e-05	0.00043892	0.0106275	7.548e-05	0.00015911	2.67e-05	0.00020886	0.0005634	0.00621183	0.00049235	0.00070076	0.0482769	0.00029239	0.00058449	0.001411	0.00033009	7.7e-07	0.00167975	9.49e-06	5.41e-06	0.00016175	0.00047062	6.818e-05	0.00150502	0.00848667
2006	7.86e-06	0.00030457	0.00148229	4.9e-07	8.098e-05	3.38e-06	2.922e-05	0.00105741	0.00371633	0.00012885	3.68e-06	0.00557137	0.00063602	0.00061266	4.404e-05	0.00124827	0.00013169	0.00022173	0.00121136	0.00057571	0.00055161	1.724e-05	0.00016896	0.00100205	1.173e-05	0.0004369	0.0119564	7.246e-05	0.00015499	2.682e-05	0.00020221	0.00061408	0.00697901	0.00041422	0.00064408	0.053059	0.0002944	0.00058876	0.00137743	0.00033662	7.1e-07	0.00165978	9.66e-06	5.38e-06	0.00015741	0.00042916	5.865e-05	0.00145201	0.00986917
2007	1.107e-05	0.00027532	0.00180838	6.7e-07	8.343e-05	4.61e-06	4.035e-05	0.00129697	0.00427053	0.00013984	4.07e-06	0.00604414	0.00077094	0.00068899	4.219e-05	0.00143158	0.00012393	0.00020327	0.00140893	0.00067924	0.00051841	2.088e-05	0.00018791	0.00115669	1.309e-05	0.00039798	0.0131145	6.891e-05	0.00014559	2.608e-05	0.00019597	0.00056524	0.00759124	0.00050615	0.00072046	0.0586028	0.00028272	0.00053207	0.00166422	0.00030237	7.4e-07	0.00206078	8.63e-06	5.45e-06	0.00015656	0.00046169	7.173e-05	0.00172505	0.0104389
2008	1.275e-05	0.00034083	0.00204157	7.7e-07	9.918e-05	5.17e-06	4.536e-05	0.00148921	0.0048061	0.00016243	4.79e-06	0.00662365	0.00088176	0.00080312	5.157e-05	0.00150434	0.00015209	0.00025557	0.00170585	0.00077789	0.0006593	2.389e-05	0.00022162	0.00121615	1.563e-05	0.00049024	0.014336	8.322e-05	0.00017757	3.152e-05	0.00023571	0.00076486	0.00819632	0.00057706	0.0008447	0.0633284	0.00034451	0.00072433	0.00182764	0.00037392	8.9e-07	0.00223386	1.069e-05	6.6e-06	0.00018814	0.00054166	8.228e-05	0.00171599	0.0109942
2009	1.754e-05	0.00042795	0.00167838	1.04e-06	0.00012746	6.67e-06	5.952e-05	0.00157727	0.00412181	0.00020194	6.14e-06	0.00617047	0.00099475	0.00092353	6.227e-05	0.00153039	0.00018941	0.0003293	0.00148491	0.00088201	0.00076467	3.065e-05	0.00028122	0.00124272	1.899e-05	0.00062195	0.0144713	0.00010566	0.00022823	3.82e-05	0.00028518	0.0007813	0.00826503	0.00072097	0.00096678	0.0684866	0.00043309	0.00076275	0.0015026	0.00047438	1.12e-06	0.00190957	1.348e-05	8.35e-06	0.00023424	0.00067877	0.00010625	0.00171228	0.0112673
2010	1.508e-05	0.00041427	0.0018753	8.6e-07	0.00010111	5.32e-06	4.811e-05	0.00165709	0.00470915	0.00015243	4.9e-06	0.00677101	0.00094279	0.00089921	4.929e-05	0.00148847	0.00016455	0.00031866	0.0015858	0.00082043	0.00073209	2.429e-05	0.00023159	0.00131849	1.544e-05	0.00058793	0.0145546	8.254e-05	0.00019695	2.98e-05	0.00025576	0.00075333	0.00860624	0.00060426	0.00096051	0.0735702	0.00040341	0.00074817	0.0016209	0.00045262	8.8e-07	0.00207989	1.064e-05	6.76e-06	0.00020037	0.00059925	8.513e-05	0.00168718	0.0113814
2011	1.558e-05	0.00030984	0.00187352	8.8e-07	9.206e-05	5.24e-06	4.782e-05	0.00175998	0.00510618	0.00013612	4.62e-06	0.00724623	0.00095678	0.00086074	4.591e-05	0.00154862	0.00013846	0.00025149	0.00164826	0.00078851	0.0005936	2.318e-05	0.0002147	0.0012915	1.531e-05	0.00043211	0.0156797	7.306e-05	0.00016217	2.713e-05	0.00020868	0.00059951	0.00923975	0.00054739	0.00093374	0.0785239	0.0003114	0.00061243	0.0016372	0.00032943	8e-07	0.00214358	9.35e-06	6.39e-06	0.00017075	0.00049	8.228e-05	0.00182825	0.0117668
2012	1.787e-05	0.00053	0.00244502	1.03e-06	0.00013815	6.03e-06	5.482e-05	0.00214526	0.0055928	0.00019543	6.35e-06	0.007709	0.00106138	0.0010614	7.247e-05	0.00173061	0.00022357	0.00042603	0.00215402	0.00091419	0.00089544	2.988e-05	0.00029416	0.00147928	2.115e-05	0.00072863	0.016248	0.00011646	0.00026524	4.221e-05	0.00032653	0.00086568	0.00973281	0.00069047	0.00111673	0.0850064	0.00049857	0.00091037	0.00219965	0.00056736	1.17e-06	0.00273041	1.611e-05	9.46e-06	0.00025893	0.00069846	0.00010422	0.00201801	0.0123233
2013	1.803e-05	0.0004593	0.00210416	1.02e-06	0.00012096	5.85e-06	5.368e-05	0.0020054	0.00530409	0.00016891	5.75e-06	0.00754121	0.00098109	0.00095493	6.352e-05	0.00161861	0.00019485	0.00037412	0.00190639	0.00083115	0.00076411	2.776e-05	0.00027005	0.00133578	1.989e-05	0.00061575	0.016773	9.861e-05	0.0002262	3.642e-05	0.00029188	0.00067623	0.00975566	0.00063972	0.00102133	0.0906877	0.00043067	0.00075672	0.00182903	0.00047579	1.02e-06	0.00244938	1.357e-05	8.54e-06	0.00022755	0.00061848	9.776e-05	0.00184651	0.0126696
2014	1.891e-05	0.00044065	0.00220409	1.09e-06	0.00011826	6.03e-06	5.63e-05	0.00225305	0.00532218	0.00016472	5.72e-06	0.00785999	0.00108377	0.00104788	5.929e-05	0.00189118	0.00018587	0.000359	0.00201817	0.00088447	0.00081835	2.809e-05	0.00026908	0.00153861	1.916e-05	0.00062194	0.017764	9.45e-05	0.00021738	3.407e-05	0.00027814	0.00067627	0.0101063	0.00064539	0.00112637	0.0967191	0.00041032	0.00080915	0.00192799	0.00044731	1e-06	0.00253868	1.288e-05	8.38e-06	0.00021809	0.00060319	9.897e-05	0.00209575	0.0127442
2015	1.638e-05	0.00036152	0.0016561	9.7e-07	0.00010118	5.26e-06	4.944e-05	0.00192245	0.00478711	0.00013988	4.96e-06	0.00735766	0.00084861	0.00081611	5.354e-05	0.00143163	0.00016501	0.00029928	0.00156534	0.00071007	0.00063014	2.454e-05	0.00023671	0.00114404	1.783e-05	0.00047628	0.0173352	7.956e-05	0.00018399	2.995e-05	0.0002471	0.00041433	0.00985187	0.00055534	0.00089306	0.102983	0.00034973	0.00054707	0.00139955	0.00035314	8.6e-07	0.00208039	1.11e-05	7.45e-06	0.00019175	0.00051804	8.583e-05	0.00165703	0.0124829
2016	2.085e-05	0.00052107	0.00228164	1.27e-06	0.00013364	6.71e-06	6.43e-05	0.00262122	0.00566415	0.00018157	6.44e-06	0.00805316	0.00109851	0.00106837	6.826e-05	0.00201273	0.00021722	0.00042969	0.00220067	0.00090525	0.00085783	3.201e-05	0.00030516	0.00148985	2.248e-05	0.00067287	0.018113	0.00010447	0.00024295	3.824e-05	0.00031179	0.00056652	0.0106622	0.00070908	0.00116004	0.109098	0.00047227	0.00078373	0.00197046	0.0005003	1.13e-06	0.00275495	1.486e-05	9.71e-06	0.00024798	0.00066668	0.0001106	0.00236325	0.0139343
2017	2.342e-05	0.00058249	0.00223591	1.44e-06	0.00015147	7.73e-06	7.396e-05	0.00257395	0.00565394	0.00021019	7.36e-06	0.00818578	0.00121234	0.00116997	7.806e-05	0.00194642	0.00024587	0.00048002	0.00217178	0.00102273	0.0009441	3.664e-05	0.00034786	0.00159592	2.572e-05	0.00075306	0.0188559	0.00011843	0.00027281	4.379e-05	0.00035234	0.00065544	0.0112824	0.0008174	0.00128565	0.114844	0.00053498	0.00087228	0.00193871	0.00056147	1.29e-06	0.00270671	1.671e-05	1.1e-05	0.00028275	0.0007635	0.00012652	0.00217964	0.0142787
2018	2.199e-05	0.00052685	0.00228112	1.41e-06	0.00013893	7.17e-06	7.055e-05	0.00275865	0.00563617	0.00018652	6.76e-06	0.00832645	0.00113919	0.00111987	6.724e-05	0.00190954	0.00022145	0.00043828	0.00227432	0.00093587	0.00089619	3.398e-05	0.0003162	0.00156028	2.251e-05	0.00068688	0.0194968	0.0001059	0.00024535	3.798e-05	0.00030076	0.00051954	0.0112031	0.00074069	0.001256	0.12275	0.00048113	0.00079468	0.00198922	0.00049857	1.17e-06	0.00283154	1.508e-05	1.003e-05	0.00025112	0.00068014	0.00011691	0.00216392	0.0140985
2019	1.788e-05	0.00065404	0.00228819	1.17e-06	0.00014361	6.01e-06	5.862e-05	0.00276105	0.00569112	0.00020027	5.9e-06	0.00817531	0.00119999	0.00120015	6.872e-05	0.0018852	0.00026277	0.00055655	0.00229837	0.00101333	0.00101271	2.919e-05	0.0003652	0.00158483	2.292e-05	0.00081	0.0191105	0.0001015	0.00027554	3.646e-05	0.00035446	0.00059691	0.0106956	0.00082068	0.00131737	0.128702	0.00059474	0.00091698	0.00202676	0.00060625	1.03e-06	0.00286126	1.398e-05	9.25e-06	0.00029429	0.00077978	0.00011373	0.00212733	0.0137221
2020	2.711e-05	0.00069524	0.00250354	1.83e-06	0.00017965	9.09e-06	9.102e-05	0.00299623	0.00617408	0.00023943	8.73e-06	0.00856526	0.00138672	0.001376	8.88e-05	0.00212697	0.00029609	0.00058876	0.00249519	0.00118005	0.00108076	4.372e-05	0.00040701	0.00180255	2.953e-05	0.000871	0.0203191	0.00013524	0.00031378	4.941e-05	0.00037736	0.0006191	0.0115773	0.00093367	0.0015327	0.13236	0.00063407	0.0009954	0.00225833	0.00065121	1.5e-06	0.00300045	1.997e-05	1.317e-05	0.00032793	0.00082916	0.00014955	0.00237373	0.013893
2021	2.435e-05	0.00062596	0.00230812	1.69e-06	0.00016622	8.3e-06	8.328e-05	0.00299353	0.00570825	0.00022171	8.4e-06	0.00888502	0.00134769	0.00128458	9.452e-05	0.00210785	0.0002827	0.00054585	0.0024417	0.00111709	0.00102617	4.151e-05	0.00039397	0.0017723	3.054e-05	0.00078127	0.0207726	0.00012343	0.0002738	5.09e-05	0.0003671	0.0005503	0.0116965	0.00088037	0.00152436	0.138331	0.0005802	0.00090889	0.00206891	0.00056354	1.47e-06	0.00294335	2.096e-05	1.325e-05	0.00031696	0.000803	0.00014091	0.00232029	0.0146395
[truncated: 158 more columns]

## Sheet: Readme
Estimated historical warming contributions for each country used in this study (starting year of historical warming contributions = 1850/1990)
The data is in ℃.
The column names represent country (or region), which is consistent to PRIMAP.
